# Supplementary material for: Usability, occupational performance and satisfaction evaluation of a smart environment controlled by infrared oculography by people with severe motor disabilities
Source: PubMed Central journal article supplement (PMC8362986; doi:10.1371/journal.pone.0256062), 2021-08-13

# PLOS ONE

## Usability, occupational performance and satisfaction evaluation of a smart environment controlled by infrared oculography by people with severe motor disabilities

--Manuscript Draft--

|                                                                                                                                                                                                                                                                                       |                                                                                                                                                                                                                                                                                                                                                                                                                                                                                                                                                                                                                                                                                                                                                                                                                                                                                                                                                                                                                                                                                                                                                                                                                                                                                                                                                                                                                                                                                                        |
|---------------------------------------------------------------------------------------------------------------------------------------------------------------------------------------------------------------------------------------------------------------------------------------|--------------------------------------------------------------------------------------------------------------------------------------------------------------------------------------------------------------------------------------------------------------------------------------------------------------------------------------------------------------------------------------------------------------------------------------------------------------------------------------------------------------------------------------------------------------------------------------------------------------------------------------------------------------------------------------------------------------------------------------------------------------------------------------------------------------------------------------------------------------------------------------------------------------------------------------------------------------------------------------------------------------------------------------------------------------------------------------------------------------------------------------------------------------------------------------------------------------------------------------------------------------------------------------------------------------------------------------------------------------------------------------------------------------------------------------------------------------------------------------------------------|
| <b>Manuscript Number:</b>                                                                                                                                                                                                                                                             | PONE-D-20-12562                                                                                                                                                                                                                                                                                                                                                                                                                                                                                                                                                                                                                                                                                                                                                                                                                                                                                                                                                                                                                                                                                                                                                                                                                                                                                                                                                                                                                                                                                        |
| <b>Article Type:</b>                                                                                                                                                                                                                                                                  | Research Article                                                                                                                                                                                                                                                                                                                                                                                                                                                                                                                                                                                                                                                                                                                                                                                                                                                                                                                                                                                                                                                                                                                                                                                                                                                                                                                                                                                                                                                                                       |
| <b>Full Title:</b>                                                                                                                                                                                                                                                                    | Usability, occupational performance and satisfaction evaluation of a smart environment controlled by infrared oculography by people with severe motor disabilities                                                                                                                                                                                                                                                                                                                                                                                                                                                                                                                                                                                                                                                                                                                                                                                                                                                                                                                                                                                                                                                                                                                                                                                                                                                                                                                                     |
| <b>Short Title:</b>                                                                                                                                                                                                                                                                   | Evaluation of a smart environment controlled by infrared oculography                                                                                                                                                                                                                                                                                                                                                                                                                                                                                                                                                                                                                                                                                                                                                                                                                                                                                                                                                                                                                                                                                                                                                                                                                                                                                                                                                                                                                                   |
| <b>Corresponding Author:</b>                                                                                                                                                                                                                                                          | Mariana Midori Sime, Ph.D.<br>Federal University of Espirito Santo<br>Vitória, Espirito Santo BRAZIL                                                                                                                                                                                                                                                                                                                                                                                                                                                                                                                                                                                                                                                                                                                                                                                                                                                                                                                                                                                                                                                                                                                                                                                                                                                                                                                                                                                                   |
| <b>Keywords:</b>                                                                                                                                                                                                                                                                      | smart environment; smart home; people with disabilities; assistive technology; infrared oculography; effectiveness                                                                                                                                                                                                                                                                                                                                                                                                                                                                                                                                                                                                                                                                                                                                                                                                                                                                                                                                                                                                                                                                                                                                                                                                                                                                                                                                                                                     |
| <b>Abstract:</b>                                                                                                                                                                                                                                                                      | <p>A smart environment is an assistive technology device that can enable people with motor disabilities to control its equipment (TV, radio, fan, etc.) through a human-machine interface activated by different inputs. However, assistive technology resources are not always considered useful, reaching quite high abandonment rates. This study aims to evaluate the effectiveness of a smart environment controlled through infrared oculography by people with severe motor disabilities. The study sample was composed of six volunteers. Initially, sociodemographic data forms, the Functional Independence Measure (FIM<sup>TM</sup>) and the Canadian Occupational Performance Measure (COPM) were applied. The volunteers used the system in their domestic environment for a week. Afterwards, they were reevaluated with regards to occupational performance (COPM), satisfaction with the use of the assistive technology resource (QUEST 2.0), psychosocial impact (PIADS) and usability of the system (SUS), as well as through semi-structured interviews for suggestions or complaints. Having “control of the TV” was the common demand, in which four of the six volunteers presented positive results in all assessment protocols, reaching greater independence in the control of the smart environment equipment. Non-acceptance of disability and lack of social support may have influenced the participants who showed negative results in using the system correctly.</p> |
| <b>Order of Authors:</b>                                                                                                                                                                                                                                                              | <p>Mariana Midori Sime, Ph.D.</p> <p>Alexandre Bissoli</p> <p>Daniel Lavino-Júnior</p> <p>Teodiano Bastos-Filho</p>                                                                                                                                                                                                                                                                                                                                                                                                                                                                                                                                                                                                                                                                                                                                                                                                                                                                                                                                                                                                                                                                                                                                                                                                                                                                                                                                                                                    |
| <b>Additional Information:</b>                                                                                                                                                                                                                                                        |                                                                                                                                                                                                                                                                                                                                                                                                                                                                                                                                                                                                                                                                                                                                                                                                                                                                                                                                                                                                                                                                                                                                                                                                                                                                                                                                                                                                                                                                                                        |
| <b>Question</b>                                                                                                                                                                                                                                                                       | <b>Response</b>                                                                                                                                                                                                                                                                                                                                                                                                                                                                                                                                                                                                                                                                                                                                                                                                                                                                                                                                                                                                                                                                                                                                                                                                                                                                                                                                                                                                                                                                                        |
| <b>Financial Disclosure</b>                                                                                                                                                                                                                                                           | <p>AB and TBF received a award in Google Research Awards for Latin America, of Google Inc.</p> <p>The funders had no role in study design, data collection and analysis, decision to publish, or preparation of the manuscript.</p>                                                                                                                                                                                                                                                                                                                                                                                                                                                                                                                                                                                                                                                                                                                                                                                                                                                                                                                                                                                                                                                                                                                                                                                                                                                                    |
| <p>Enter a financial disclosure statement that describes the sources of funding for the work included in this submission. Review the <a href="#">submission guidelines</a> for detailed requirements. View published research articles from <a href="#">PLOS ONE</a> for specific</p> |                                                                                                                                                                                                                                                                                                                                                                                                                                                                                                                                                                                                                                                                                                                                                                                                                                                                                                                                                                                                                                                                                                                                                                                                                                                                                                                                                                                                                                                                                                        |

examples.

This statement is required for submission and **will appear in the published article** if the submission is accepted. Please make sure it is accurate.

#### Unfunded studies

Enter: *The author(s) received no specific funding for this work.*

#### Funded studies

Enter a statement with the following details:

- Initials of the authors who received each award
- Grant numbers awarded to each author
- The full name of each funder
- URL of each funder website
- Did the sponsors or funders play any role in the study design, data collection and analysis, decision to publish, or preparation of the manuscript?
- **NO** - Include this sentence at the end of your statement: *The funders had no role in study design, data collection and analysis, decision to publish, or preparation of the manuscript.*
- **YES** - Specify the role(s) played.

\* typeset

#### Competing Interests

Use the instructions below to enter a competing interest statement for this submission. On behalf of all authors, disclose any [competing interests](#) that could be perceived to bias this work—acknowledging all financial support and any other relevant financial or non-financial competing interests.

This statement **will appear in the published article** if the submission is accepted. Please make sure it is accurate. View published research articles from [PLOS ONE](#) for specific examples.

The authors have declared that no competing interests exist.

**NO authors have competing interests**

Enter: *The authors have declared that no competing interests exist.*

**Authors with competing interests**

Enter competing interest details beginning with this statement:

*I have read the journal's policy and the authors of this manuscript have the following competing interests: [insert competing interests here]*

\* typeset

**Ethics Statement**

Enter an ethics statement for this submission. This statement is required if the study involved:

- Human participants
- Human specimens or tissue
- Vertebrate animals or cephalopods
- Vertebrate embryos or tissues
- Field research

Write "N/A" if the submission does not require an ethics statement.

General guidance is provided below. Consult the [submission guidelines](#) for detailed instructions. **Make sure that all information entered here is included in the Methods section of the manuscript.**

This study was approved by the Human Research Ethics Committee of Federal University of Espirito Santo (UFES), Brazil, under protocol no. 976.828, CAAE 39410614.6.0000.5060. All participants who agreed to participate in the research signed a Free and Informed Consent Form (FICF) and received a copy of it.

**Format for specific study types**

**Human Subject Research (involving human participants and/or tissue)**

- Give the name of the institutional review board or ethics committee that approved the study
- Include the approval number and/or a statement indicating approval of this research
- Indicate the form of consent obtained (written/oral) or the reason that consent was not obtained (e.g. the data were analyzed anonymously)

**Animal Research (involving vertebrate animals, embryos or tissues)**

- Provide the name of the Institutional Animal Care and Use Committee (IACUC) or other relevant ethics board that reviewed the study protocol, and indicate whether they approved this research or granted a formal waiver of ethical approval
- Include an approval number if one was obtained
- If the study involved *non-human primates*, add *additional details* about animal welfare and steps taken to ameliorate suffering
- If anesthesia, euthanasia, or any kind of animal sacrifice is part of the study, include briefly which substances and/or methods were applied

**Field Research**

Include the following details if this study involves the collection of plant, animal, or other materials from a natural setting:

- Field permit number
- Name of the institution or relevant body that granted permission

**Data Availability**

Authors are required to make all data underlying the findings described fully available, without restriction, and from the time of publication. PLOS allows rare exceptions to address legal and ethical concerns. See the [PLOS Data Policy](#) and [FAQ](#) for detailed information.

No - some restrictions will apply

A Data Availability Statement describing where the data can be found is required at submission. Your answers to this question constitute the Data Availability Statement and **will be published in the article**, if accepted.

**Important:** Stating 'data available on request from the author' is not sufficient. If your data are only available upon request, select 'No' for the first question and explain your exceptional situation in the text box.

Do the authors confirm that all data underlying the findings described in their manuscript are fully available without restriction?

**Describe where the data may be found in full sentences. If you are copying our sample text, replace any instances of XXX with the appropriate details.**

- If the data are **held or will be held in a public repository**, include URLs, accession numbers or DOIs. If this information will only be available after acceptance, indicate this by ticking the box below. For example: *All XXX files are available from the XXX database (accession number(s) XXX, XXX).*
- If the data are all contained **within the manuscript and/or Supporting Information files**, enter the following: *All relevant data are within the manuscript and its Supporting Information files.*
- If neither of these applies but you are able to provide **details of access elsewhere**, with or without limitations, please do so. For example:

*Data cannot be shared publicly because of [XXX]. Data are available from the XXX Institutional Data Access / Ethics Committee (contact via XXX) for researchers who meet the criteria for access to confidential data.*

*The data underlying the results presented in the study are available from (include the name of the third party*

Data cannot be shared publicly because of Ethics Committee terms. 

*and contact information or URL).*

- This text is appropriate if the data are owned by a third party and authors do not have permission to share the data.

\* typeset

Additional data availability information:

1 **Usability, occupational performance and satisfaction evaluation of a**  
2 **smart environment controlled by infrared oculography by people with**  
3 **severe motor disabilities**

4  
5 Mariana Sime<sup>1\*¶, #a</sup>, Alexandre Bissoli<sup>2&</sup>, Daniel Lavino-Júnior<sup>3&</sup>, Teodiano Bastos-  
6 Filho<sup>4¶, #b</sup>

7 <sup>1</sup> Occupational Therapy Department, Federal University of Espirito Santo (UFES),  
8 Vitoria-ES, Brazil

9 <sup>2</sup> Postgraduate Program in Electrical Engineering, Electrical Engineering Department,  
10 Federal University of Espirito Santo (UFES), Vitoria-ES, Brazil

11 <sup>3</sup> Electrical Engineering Department, Federal University of Espirito Santo (UFES),  
12 Vitoria-ES, Brazil

13 <sup>4</sup> Postgraduate Program in Electrical Engineering, Electrical Engineering Department  
14 and Postgraduate Program in Biotechnology, Federal University of Espirito Santo  
15 (UFES), Vitoria-ES, Brazil

16  
17 <sup>#a</sup> Current Address: Department of Occupational Therapy, Federal University of  
18 Espirito Santo – Maruípe Campus, Vitória, Espirito Santo, Brazil.

19 <sup>#b</sup> Current Address: Department of Electrical Engineering, Federal University of  
20 Espirito Santo – Goiabeiras Campus, Vitória, Espirito Santo, Brazil.

21  
22 \* Corresponding author

23 E-mail: [mariana.sime@ufes.br](mailto:mariana.sime@ufes.br) (MS)

24  
25 ¶ These authors contributed equally to this work.

26 & These authors also contributed equally to this work.

27

28

29

30

## 31 Abstract

32 A smart environment is an assistive technology device that can enable people with  
33 motor disabilities to control its equipment (TV, radio, fan, etc.) through a human-  
34 machine interface activated by different inputs. However, assistive technology  
35 resources are not always considered useful, reaching quite high abandonment rates.  
36 This study aims to evaluate the effectiveness of a smart environment controlled  
37 through infrared oculography by people with severe motor disabilities. The study  
38 sample was composed of six volunteers. Initially, sociodemographic data forms, the  
39 Functional Independence Measure (FIM<sup>TM</sup>) and the Canadian Occupational  
40 Performance Measure (COPM) were applied. The volunteers used the system in their  
41 domestic environment for a week. Afterwards, they were reevaluated with regards to  
42 occupational performance (COPM), satisfaction with the use of the assistive  
43 technology resource (QUEST 2.0), psychosocial impact (PIADS) and usability of the  
44 system (SUS), as well as through semi-structured interviews for suggestions or  
45 complaints. Having 'control of the TV' was the common demand, in which four of the  
46 six volunteers presented positive results in all assessment protocols, reaching greater  
47 independence in the control of the smart environment equipment. Non-acceptance of  
48 disability and lack of social support may have influenced the participants who showed  
49 negative results in using the system correctly.

50

51 **Keywords:** smart environment; smart home; people with disabilities; assistive  
52 technology; infrared oculography; effectiveness

53

54

55



## 56 Introduction

57 A Smart Environment (SE) is a space (room, house, office, etc.) in which the  
 58 services (temperature, lighting, communication, entertainment, security, etc.) and/or  
 59 equipment (heating, air conditioning, lamps, radio, television, alarm, etc.) are managed  
 60 intelligently using technology (computer, tablet, smartphone, remote control, etc.),  
 61 aiming to assist users or residents with their daily activities and providing them with  
 62 better quality of life (QoL) [1,2].

63 Smart environments, or smart homes when referring to people's homes, can also be  
 64 focused on monitoring residents (older people or people with disabilities). In these  
 65 cases, the SE learns the normal patterns of habits and behaviors, thus recognizing  
 66 abnormal situations such as falls, prolonged time in the same place or position, repeated  
 67 walking between two rooms, and changes in routine [2–6].

68 However, more recently, many studies have focused on the development of smart  
 69 homes that aim ~~at providing~~ <sup>to e</sup> greater independence for people with motor disabilities,  
 70 combining their residual skills with the physical environment, since this group ~~presents~~ <sup>experiences</sup>  
 71 several limitations ~~for accessible~~ <sup>in the use of</sup> environments and equipment control [1,7–13].

72 Despite the gradual increase in the number of these studies, only few of them have  
 73 addressed the benefits of SEs for people with disabilities with regard to the exercise of  
 74 autonomy, i.e., freedom of opinion, choice and decision [14], improving performance  
 75 and usability.

76 The reviews by Martin et al. [15] and Brandt et al. [16] found no evidence about the  
 77 effectiveness of smart homes for people with disabilities. Differences in sample size and  
 78 interventions and instruments used hinder comparison between studies, but it was  
 79 possible to notice a tendency to facilitate independence, instrumental Activities of Daily  
 80 Living (ADL), socialization, and quality of life.

81 Marikyan, Papagiannidis and Alamanos [17] consider that there is increased  
82 research addressing SEs; however, they criticize the fact that the studies are restricted to  
83 three themes: they do not consider the multiple diversities of the smart home concept;  
84 focus on the functioning of technological devices, architecture and infrastructure;  
85 present possible benefits of technology, but are little dedicated to pointing out the  
86 perspective of users.

87 In this sense, further studies addressing the effectiveness of SEs in the everyday life  
88 of people with severe motor disabilities should be carried out. The home environment  
89 interaction system used in this study was developed at the Assistive Technology Center  
90 (NTA) of the Federal University of Espirito Santo (UFES), Brazil. It consists of a smart  
91 global box (gBox) coupled to a computer software that enables the user to control  
92 electronic equipment (TV, radio, and fan and lighting using eye-tracking technology  
93 [18].

94 The main objective of this study was to evaluate the effectiveness of the developed  
95 SE controlled through infrared oculography for specific use by people with severe  
96 motor disabilities.

97 The study participants were assessed with regards to their occupational  
98 performance and satisfaction with the use of the Assistive Technology (AT) device, the  
99 psychosocial impact of using the environment control system, the usability of the  
100 equipment, as well as to their suggestions and complaints about the system.

101 The work is organized as follows: in addition to this introduction, a literature  
102 review on people with disabilities, AT, and SE is presented in second section, a  
103 description of the materials and methods used can be found in third section, the results  
104 and discussion are presented in fourth section, the fifth section contains the study  
105 conclusions, and sixth section presents details of the submitted patent.

Type text here

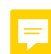

## 106 Literature Review

### 107 People with disabilities

108 ~~Prevalence of people with disabilities has increased worldwide over the years.~~  
109 ~~According to the World Report on Disability [19], there is a progressive concern with~~  
110 ~~this theme due to the aging of populations and the consequent increased risk of~~  
111 ~~disabilities and incidence of chronic diseases such as diabetes, cardiovascular~~  
112 ~~conditions, and cancer.~~

113 In adults or older people, motor disabilities often result from diseases or injuries  
114 that affect the Central Nervous System and/or Peripheral Nervous System, such as  
115 Muscular Dystrophies, Multiple Sclerosis, Amyotrophic Lateral Sclerosis, Stroke,  
116 Cranioencephalic Trauma, Spinal Trauma, among others.

117 The literature indicates that individuals with the aforementioned health conditions  
118 present sensory, motor, language and behavioral impairments at different levels, which  
119 lead to deficits in their occupational performance for carrying out ADL independently,  
120 as well as deficits in the interaction with people and objects [20–29], and these  
121 individuals can become quite dependent on family members and/or caregivers [30].

122 The aforementioned studies demonstrate how much these handicaps or disabilities  
123 impair various aspects of these people's everyday lives, decreasing their QoL, changing  
124 their occupational roles, or increasing their dependence to perform ADL. ~~Thus, it is~~  
125 ~~necessary to address this problem since many diseases or traumas affect young and/or~~  
126 ~~working age populations.~~ In this context, AT devices can be used in order to alleviate  
127 disability in these populations.

128 Aiming at better understanding the consequences of these diseases and aging  
129 processes, the World Health Organization (WHO) published, in 2001, the International  
130 Classification of Functioning, Disability and Health (ICF) with the general objective of

131 establishing a common and standardized language between different countries, as well  
132 as structuring and organizing information related to human functionality [31].

133 Thus, the ICF understands that a person's functionality and disability are the result  
134 of the dynamic interaction between the following elements: Health Condition, Body  
135 Functions and Structures, Activity, Participation, and Contextual Factors  
136 (Environmental and Personal). The focus is no longer centered on the disease or  
137 disorder, and people's disabilities are configured as their environments/contexts limit  
138 their activities and restrict their social participation, not favoring their functionality [31–  
139 33].

140

## 141 **Assistive Technology (AT)**

142 Assistive technology has been defined in different ways: the area of knowledge that  
143 includes products, resources, methodologies, strategies and services [34]; items, products  
144 and equipment acquired, adapted or modified [35] with the aim of improving the  
145 functional performance, independence, and QoL of people with disabilities.

146 According to the ICF, AT devices and resources are allocated into the Environmental  
147 Factors of this classification, and are very important for people with disabilities due to the  
148 expansion of forms of communication, mobility, environment control, integration with  
149 networks, and social and learning skills [31,36].

150 Assistive technology resources can be classified or categorized according to 1) their  
151 purpose – adaptations for ADL, Alternative and Augmentative Communication (AAC),  
152 accessibility for computer use, etc. [36]; 2) their complexity – low-tech (easier to acquire,  
153 control or build, not requiring electricity) or high-tech (more difficult to acquire, more  
154 expensive and complex, including electronic components, or being electronically  
155 powered); 3) ranging from hard technology (palpable, whose components can be

156 purchased and/or assembled, such as computer hardware, AAC, or mobility devices) to  
157 soft technology (less palpable, with support for the use of devices, such as knowledge,  
158 strategies, training, services and software) [37].

159 Therefore, knowledge of several professionals from different areas may be involved  
160 in the prescription, development, manufacturing and application of AT, such as engineers,  
161 designers, physiotherapists, speech therapists, physicians, occupational therapists,  
162 prosthetists, among others [36–38].

163 The literature indicates that AT resources provide countless benefits, of both low and  
164 high technology, to people with motor disabilities and/or older people, especially in the  
165 area of education, work, and life in the community [39]; to the functional performance of  
166 ADL, psychosocial aspects, and reduction of expenses with caregivers and hospital  
167 admissions [40–42]; to the communication and psychosocial adjustments of people with  
168 Incarceration Syndrome [43,44] or degenerative diseases [45]; to independence, social  
169 participation and reduced caregiver burden [46,47]; to improving the function of upper  
170 limbs [21]. 

171 In this context,  can be indicated for people with severe motor disabilities, as they  
172 enable even individuals with little mobility to control the lighting and electronic  
173 equipment of their environment (TV, radio, fan) through a Human-Machine Interface  
174 (HMI) configured to be triggered by different inputs such as voice; surface  
175 electromyography: touch, head movements, inspiration and expiration (sip-n-puff), eye  
176 blink; electroencephalography: brain waves; infrared oculography: eye tracking.

177 However, it is known that although AT plays an important role in the recovery or  
178 improvement of the functionality of people with disabilities, clinical practice and the  
179 literature show high rates of abandonment or non-use of AT devices by users [48–51]. In  
180 the same sense, the literature also points to a lack of studies that address the effectiveness

181 provided by AT in this population [52,53], as well as the importance of good assessment  
182 using valid, reliable and viable instruments, and covering various aspects of AT [54].

183 Several studies have been conducted with the aim of understanding the abandonment  
184 or non-use of AT devices. Many reasons have been described: people do not like or need  
185 the device anymore, stigma and shame for the need of AT, highlight of the need for help,  
186 cognitive problems, cultural or traditional reasons, unfamiliarity of its advantages,  
187 because the device is chosen only by the therapist or the family (not by themselves), low  
188 esthetic quality, difficulty in maintaining and programming it, and difficulty in  
189 performing the desired activities [42,47,48,55].

190 With the aim of decreasing AT abandonment and dissatisfaction rates and increasing  
191 the sense of independence, the literature highlights the importance of patient/user  
192 participation in the development of the AT resource or device [46,56–58], or in the  
193 process of defining and choosing the device best suited to their needs. It is also important  
194 that a trained and updated team carry out the evaluation and monitoring of AT use  
195 [46,48,49,59].

196 Regarding SEs, it is necessary to assess the individuals' real demands in controlling  
197 the environment, the inputs that can be used, the expectations and factors involved in the  
198 process of acceptance and use of this resource, as well as understanding the benefits that  
199 this technology can bring to their occupational performance and use satisfaction.

200 Zhao, Zhang and Crabtree [60] highlight that HMI design plays an important role in  
201 the development and improvement of SEs, as well as advances in the technology of  
202 sensors, monitors and controllers, which provide the necessary tools for their more  
203 efficient and effective use.

204 Thus, for the indication and implementation of AT devices, a possible start would be  
205 from the study of several conceptual models, from which the Human Activity Assistive

206 Technology (HAAT) model [37,61] was used in this study. The HAAT model proposes to  
207 understand the role of AT in the lives of people with disabilities, and is based on four  
208 elements: the Human, the Activity, the Assistive Technology, and the Context in which  
209 the other three elements are inserted. Thus, the HAAT model describes “someone  
210 (human) doing something (activity) in a context using assistive technology” [37] (p.7).

211 According to Cook and Polgar [37], the Activity is the central element of the model,  
212 as it defines the objective of using the AT resource, directed to the person's needs. It also  
213 includes temporal aspects (duration and frequency of participation), involvement of other  
214 people, and place where it occurs. The Human component includes motor, sensory,  
215 cognitive and affective skills, as well as the roles that the person plays in life (a  
216 combination of the many activities that characterize their identity), their experience with  
217 technology, and their motivation to resume the performance of activities and for the use of  
218 technology [37]. The Context considers the physical (natural and built environments),  
219 social (people, society, attitudes), cultural (beliefs, rituals, values, being part of a group)  
220 and institutional (laws, regulations, policies, funding that enable social inclusion) aspects  
221 [37]. Finally, the Assistive Technology factor is the facilitator, so that the person can  
222 perform a certain activity in the context in which they are inserted [37].

223 Thus, during the process of preparing and/or indicating an AT resource or device, it is  
224 important to understand the activity that the person wants and needs to perform, the  
225 capacities they have, and the influence of different aspects of the context that will  
226 influence their acquisition and use.

227 In this study, the person with motor disabilities is considered as the Human  
228 component; the Activity is the use and control of electronic equipment; the AT  
229 component is the SE, controlled by eye tracking; the Context refers to higher autonomy  
230 and independence within the domestic environment.

## 231 **Smart Environment (SE)**

232 According to Rampinelli et al. [62], an SE consists of a network of sensors used to  
233 obtain information from the observed world, together with a network of actuators  
234 (computer screens, wheelchairs, equipment, devices, etc.) that enable users to interact. For  
235 those authors, the sensor network and the intelligence that regulates it are invisible to the  
236 user, making decisions and cooperating between different autonomous agents in order to  
237 carry out an action or task.

238 Lee and Hashimoto [63] present SE as a space where distributed sensors, connected  
239 to a network, observe people and provide them with information, in addition to  
240 controlling all systems through actuators. This space includes robots, which are assisted  
241 by the SE, working as physical agents and performing services for people.

242 According to Aarts and Encarnação [64], in the term Ambient Intelligence,  
243 Ambience refers to the environment and reflects the need for a strong integration of  
244 technology with everyday objects, whereas Intelligence refers to how the environment  
245 should be able to recognize the people who live in it, adapt to them, learn from their  
246 behavior, and possibly act on their behalf.

247 Therefore, the objective of an SE is to improve “the quality of people’s lives by  
248 creating the desired atmosphere and providing appropriate functionality by means of  
249 intelligent, personalized and interconnected systems and services” [64] (p.2).

250 Aldrich [65] proposes five hierarchical classes of smart homes, complemented by  
251 Gentry [13], based on the functionality available to the user: Class 1 is made up of homes  
252 that contain intelligent stand-alone objects: simple and autonomous appliances and  
253 objects that work intelligently by remote control, touch, sip-n-puff, voice control and eye  
254 gaze command, and contain light sensors, smoke and water leak detectors, alarm clocks  
255 and medication alarms. Class 2 comprises homes that contain intelligent and



256 communicating objects that use wired and wireless networks to exchange information  
257 with each other, such as devices controlled by computers; they usually connect Class 1  
258 devices to computers, making it possible to schedule sequential activities. Class 3  
259 includes connected homes that have internal and external networks, enabling remote  
260 control of equipment, via internet, cameras or telephone; they connect class 2 systems to  
261 external computers. Class 4 is composed of learning homes in which computers register  
262 the patterns of human activities and administer the devices according to the residents'  
263 needs. Class 5 includes attentive homes, which are also based on learning the patterns of  
264 human activities to control technology in anticipation of the residents' needs.

265       According to Gentry [13], classes 1 and 2 are composed of passive systems that  
266 cannot monitor the performance of residents, unlike those in classes 3, 4 and 5.

267       Lee and Hashimoto [63] claim that in an SE, the architecture of software and  
268 hardware must present six properties: 1) be modular (components can be added or  
269 removed from the environment); 2) be scalable (enable integration of local spaces with  
270 larger systems); 3) present integration (be simple and integrated with intelligent  
271 components or services existing in the space); 4) be achievable (technologies and  
272 elements that can be easily obtained); 5) be inexpensive (due to the number of  
273 components required and use of standard hardware); 6) be of easy setup and maintenance  
274 (automatic calibration and easy adaptation to the environment).

275       Zhao, Zhang and Crabtree [60] discuss approaches that they consider to be  
276 innovative and that provide general guidance to assist designers and developers with  
277 improving user experience and satisfaction with the SE, such as having more efficient  
278 general control panels (familiar to users), effective user interfaces (known by users and  
279 with individualized settings) and variable accessibility (setting limits for children), as well  
280 as securing privacy. In contrast, Gentry [13] reports that smart home technology was

281 initially developed to provide comfort for people and that, over time, has been used to  
282 assist people with mobility, sensory or cognitive problems. According to that author,  
283 smart homes for people with disabilities refer to the use of electronic AT resources aiming  
284 at increasing their independence and reducing their need for help from caregivers or  
285 family members.

286 For the control of electronic equipment in a smart home by people with motor  
287 disabilities, different ways of capturing their inputs can be used, and Infrared  
288 Oculography (IROG) is a technique that has been significantly studied in computer  
289 science [10,13,18,66,67].

290 In IROG, a device performs eye movement tracking, calculating the point on the  
291 computer screen the user is looking at (a technique known as eye tracking). Eye tracking  
292 devices have a video camera equipped with high resolution infrared (IR) light-emitting  
293 diodes (LED) that reflect and increase the contrast between the pupil and the iris, allowing  
294 precise pupil location and facilitating the tracking of eye movement. This movement then  
295 functions as an HMI modality, enabling users to control several applications through eye  
296 tracking [68–70].

297 This technique has proved to be one of the most indicated and useful for people with  
298 severe motor disabilities who are unable to hold or manipulate a computer keyboard or  
299 mouse, making them able to use this HMI in an easier, comfortable and intuitive way  
300 [71], without the need to place electrodes or equipment on their bodies. Another factor  
301 that contributes to the use of IROG is that eye movement is one of the few abilities  
302 maintained in people with severe motor disabilities [72].

303

304

305

## 306 **Materials and Methods**

307 This study was approved by the Human Research Ethics Committee of Federal  
308 University of Espirito Santo (UFES), Brazil, under protocol no. 976.828, CAAE  
309 39410614.6.0000.5060. All participants who agreed to participate in the research signed  
310 a Free and Informed Consent Form (FICF) and received a copy of it.

311

## 312 **Materials**

313 The following materials were used in this study:

314 Notebook computer: HP 14-AP020, with Intel<sup>®</sup> Core™ i3-5005U processor,  
315 Windows<sup>®</sup> 10 Home Edition operating system, 4GB RAM and 500GB HD memory,  
316 integrated graphics with Intel<sup>®</sup> HD graphics technology, and 14" LED screen. Tobii Eye  
317 Tracker 4C [73]: the advantages of the Tobii 4C for this study are as follows: a)  
318 possibility of making movements with the head without changing the equipment  
319 calibration, b) possibility to choose whether the control will be carried out with only one  
320 or both eyes, c) booting with the computer, and d) register of the user with no need for  
321 frequent calibrations. For better use, the Gaze Point software [74], which allows  
322 controlling the mouse cursor, was also installed in the notebook computer. Global Box  
323 (gBox): an SE controller module [18]. Through the computer, the user sends commands  
324 to the gBox (Fig 1) via Wi-Fi to activate the home devices, which are attached to the box  
325 sockets. SE control interface (CI) (Fig 2) [18]: configured in a Web application with a  
326 management center in which it is possible to view the last commands emitted by the  
327 user, configure the signals of the TV remote control(s), record the actions performed by  
328 the user, download the data history, and change access passwords. The CI covers the  
329 whole notebook computer screen, allowing greater concentration during use. When  
330 clicking on START in the initial interface (a), a CI containing the main menu (b)

331 appears on the screen, and the user can go to the devices they wish to turn on (START),  
332 configure the system (CONFIG), or return to the initial screen (CLOSE). In the  
333 configuration menu (c), the user can choose the size of the icons (small, medium, or  
334 large) and the reaction time of the cursor (0.5s, 1.0s, 2.0s, or 3.0s). In the home  
335 equipment control menu (d), the devices registered for control (fan, radio, TV, and  
336 lighting) are displayed. To activate the device, the mouse cursor must be positioned on  
337 its icon for the time defined in the settings. When activated, the background of the icon  
338 turns yellow (e), except for the TV icon, which when activated directs the user to a  
339 submenu (f) to turn it on/off or control its channels or volume. In this submenu, when  
340 any icon is clicked on, it will momentarily show a yellow background, indicating the  
341 click. Router: D-Link Wi-Fi Router + 150Mbps repeater mode: it has the function of  
342 sending equipment control commands from the notebook computer to the gBox.  
343 Portable table: used to position the equipment (Fig 3), facilitating its transport and use  
344 by the user, occupying the smallest space possible in the residence.

345

346 **Fig 1. gBox: electronic module to control home devices in the SE.**

347

348 **Fig 2. User control interface. Reproduced with permission from [18].**

349

350 **Fig 3. Portable table, eye tracker, and notebook computer are installed.**

351

## 352 **Data collection instruments**

353 The following instruments were used to collect information from the volunteers  
354 during HMI use:

355 Sociodemographic data forms applied at the beginning of the evaluation to collect  
356 the participant's personal data (name, age, gender, occupation, primary caregiver,  
357 education level, contacts, etc.), as well as information on the diagnosis and history of  
358 the disease or injury, body structures affected, main complaints, treatments undergone,  
359 and experience with the use of technology.

360 Functional Independence Measure (FIM<sup>TM</sup>) [75,76]: it assesses the degree of  
361 assistance needed so that users can perform motor and cognitive activities. Eighteen  
362 tasks are evaluated, divided into self-care, sphincter control, transfers, locomotion,  
363 communication, and social cognition. The score ranges from 1 (total assistance) to 7  
364 (complete independence). In this study, this measure was applied to characterize the  
365 difficulties of each volunteer in the performance of ADL, and was scored based on the  
366 volunteers or caregivers' reports.

367 Canadian Occupational Performance Measure (COPM) [77]: created for the  
368 practice of Client-centered Occupational Therapy, it evaluates the intervention results,  
369 scoring from 1 to 10 the changes in the client's perception of their performance in  
370 carrying out activities and satisfaction with performance. Changes are considered  
371 significant when two or more points are reached between the initial and final  
372 assessments. It was directed to obtain information on demands for the use of home  
373 devices in SEs. In this study, it was applied at evaluation and reevaluation.

374 Psychosocial Impact of Assistive Devices Scale (PIADS) [78]: it assesses the  
375 effects of an AT device on the functional independence, well-being and QoL of users. It  
376 is self-administered, punctuating the 26 sentences in the questionnaire using a Likert  
377 scale that varies between -3 (maximum negative impact) and +3 (maximum positive  
378 impact). This instrument is divided into three subscales: Competence (impact of the  
379 device on functional independence, performance and productivity), Adaptability

380 (feeling of willingness to risk, how much the device enables participation in activities),  
381 and Self-esteem (effect of the device on self-confidence, self-esteem, and emotional  
382 well-being), which according to the developers are fundamental for QoL. This scale was  
383 applied at reevaluation.

384 Quebec User Evaluation of Satisfaction with Assistive Technology (QUEST 2.0)  
385 [79,80]: it assesses satisfaction with the AT resource (eight items) and with the services  
386 received by the user (four items) from a scale ranging from 1 (not fully satisfied) to 5  
387 (very satisfied). In its second part, the interviewees must indicate three out of the 12  
388 items that they consider most important. This instrument aimed to assess the satisfaction  
389 with the environment control system and the services offered by the team with regard  
390 mainly to guidelines, equipment installation, and training for use. It was applied at  
391 reevaluation.

392 System Usability Scale (SUS) [81]: it is used to evaluate the usability of the  
393 environment control system. It is self-administered, with ten sentences covering a  
394 variety of aspects of the system usability, such as need for support, training and  
395 complexity, with a high level of apparent validity for measuring usability. It is scored  
396 using a 5-point Likert scale ranging from 1 (strongly disagree) to 5 (strongly agree).  
397 This tool was applied at reevaluation.

398 Semi-structured interviews applied at reevaluation with the aim of obtaining  
399 information about the process of using the system that could not be obtained from the  
400 other instruments. Issues such as time of use, positive and negative points of the system,  
401 complaints, and suggestions for improvement were addressed. For better registration  
402 and analysis, the interviews were audio recorded and later transcribed.

403

404

## 405 **Participants**

406 Inclusion criteria were as follows: people aged  $\geq 18$  years with motor disabilities that  
407 compromised the normal interaction with equipment in the home environment, such as  
408 people with quadriplegia, Amyotrophic Lateral Sclerosis (ALS), Multiple Sclerosis (MS),  
409 among other health conditions indicated by rehabilitation institutions or professionals.  
410 Volunteers should also have a caregiver of age and literate. Individuals with cognitive  
411 deficits that compromised understanding of the equipment functioning and use, as well as  
412 of the assessment instruments, and with visual deficits not corrected by lenses (glasses or  
413 contact lenses) were excluded from the study. Information on the cognitive deficit of each  
414 volunteer was obtained from their assisting professionals.

415

## 416 **Procedures**

417 A visit to each of the volunteer's homes was scheduled for the initial assessment and  
418 installation of the system. After acceptance, each volunteer or caregiver signed a FICF,  
419 responded to the sociodemographic data form, and underwent application of the FIM<sup>TM</sup>  
420 and COPM measures, which address activities that require the use of equipment at home.

421 The system was installed in the residence room most used during the day as indicated  
422 by the volunteer or caregiver. Figure 4 shows the system installed in the home of one of  
423 the volunteers.

424

425 **Fig 4. System installed in the home of one of the study participants.**

426

427 Both the volunteer and the caregiver were trained to use the system. The caregiver's  
428 role was to turn on the notebook computer, position the table where the computer and the  
429 eye tracker were installed, and calibrate the eye tracker whenever necessary. A copy of

430 the user manual containing detailed explanations on the eye tracker calibration and  
431 equipment control was also provided to the participants.

432 The system remained installed at each participant's home for one week, as in the  
433 study conducted by Calvo et al. [82], who evaluated the impact of using an eye tracking  
434 device on the QoL of people with ALS for seven days and found improvement in the  
435 perceived QoL of users. When necessary, extra visits to the participants' homes were  
436 made in order to make adjustments or assist with use.

437 At the end of that period, reassessments were carried out using the COPM, the other  
438 instruments (QUEST 2.0, PIADS, and SUS), and the semi-structured interview.

439 It is worth mentioning that a pilot study was previously carried out with a participant  
440 with motor disabilities aiming to verify the system functionality in a common home  
441 environment, and whether the defined methodology was adequate to the study objectives  
442 with regard to application of the evaluation protocols and reassessments, verbal and  
443 written guidelines, and training. For this volunteer, specifically, the system was used for  
444 three weeks and presented no problems.

445 The pre- and post-test statistical analyses of the COPM instrument were performed  
446 using the Paired Sample *t*-Test considering a statistically significant difference of 5%  
447 ( $p < 0.05$ ). This statistical test was chosen because of its robustness, considering the low  
448 sampling power obtained with small samples. Results of the other instruments are  
449 presented descriptively.

450

## 451 **Results and Discussion**

452 Six people with disabilities participated in this study. Of these, two individuals did  
453 not use the system during the period that the equipment remained in their homes, and  
454 their cases will be discussed later.



455 Despite its small sample size, this research aimed to analyze few volunteers for a  
 456 prolonged time of use of the system in their homes, and not occasionally in the  
 457 laboratory, because its main objectives were to assess occupational performance,  
 458 usability, and satisfaction with the developed AT device.

459 Table 1 shows the main information about the volunteers who used the system.

460

461 **Table 1. Data of participants who used the system**

| <b>Volunteer</b> | <b>Age</b> | <b>Gender</b>  | <b>Education level</b>      | <b>Caregiver</b>          | <b>Health condition</b>                             | <b>Time elapsed since diagnosis</b> |
|------------------|------------|----------------|-----------------------------|---------------------------|-----------------------------------------------------|-------------------------------------|
| <b>PP1</b>       | 63         | F <sup>a</sup> | Complete higher education   | Husband                   | Amyotrophic Lateral Sclerosis + Psoriatic Arthritis | 5 months                            |
| <b>PP3</b>       | 30         | F              | Incomplete higher education | Mother + formal caregiver | Autoimmune vasculitis                               | 8 years                             |
| <b>PP5</b>       | 46         | M <sup>b</sup> | Complete high school        | Fiancée                   | Spinal cord injury (incomplete C7 level)            | 29 years                            |
| <b>PP6</b>       | 58         | M              | Complete higher education   | Former wife + children    | Amyotrophic Lateral Sclerosis                       | 1 year and 9 months                 |

462 <sup>a</sup>F – Female; <sup>b</sup>M – Male.

463

464 The mean age of participants was 49 years. Volunteers PP1, PP5, and PP6 presented  
 465 basic knowledge of technologies, more focused on the use of cell phones. Volunteer PP3  
 466 had intermediate knowledge in using computers and cell phones before presenting the  
 467 disease signs and symptoms.

468 Results on functionality collected through the FIM<sup>TM</sup> are presented in Table 2.

469

470 **Table 2. FIM™ results of participants who used the system**

| <b>Volunteer</b> | <b>Motor FIM™</b> | <b>Cognitive FIM™</b> | <b>Total FIM™</b> |
|------------------|-------------------|-----------------------|-------------------|
| <b>PP1</b>       | 47/91             | 35/35                 | 82/126            |
| <b>PP3</b>       | 25/91             | 23/35                 | 48/126            |
| <b>PP5</b>       | 44/91             | 35/35                 | 79/126            |
| <b>PP6</b>       | 67/91             | 35/35                 | 102/126           |

471

472 As previously described, the FIM™ score considers the need for assistance in each  
 473 activity, ranging from 1 (total assistance) to 7 (complete independence). For a better  
 474 understanding of the volunteers' motor condition, the following brief descriptions of each  
 475 of them are presented. As for the cognitive part of the FIM™, only volunteer PP3  
 476 presented a lower score as a result of difficulty in communication.

- 477 • PP1: 63 year-old female.

478 Diagnosed in June 2018 with ALS and Psoriatic Arthritis with onset of symptoms  
 479 in 2016. She cannot walk long distances and can only take a few steps at home.  
 480 Currently, she spends most of her time in a wheelchair or in bed. She presents a  
 481 deficit in strength and dexterity in the upper limbs. She mentions that taking a  
 482 shower and eating alone takes her longer than usual. She frequently uses her  
 483 smartphone to communicate with friends and family, and the TV remote control  
 484 with some difficulty, pressing the wrong buttons and taking longer. Her husband is  
 485 her main caregiver, assisting her with the most difficult activities (getting dressed  
 486 and transfers).

- 487 • PP3: 30 year-old female.

488 In 2010, she started showing signs of strabismus, lethargy, and loss of balance. She  
 489 was immediately assisted for accelerated loss of motor skills. After investigating  
 490 several illnesses unsuccessfully, she was diagnosed with autoimmune vasculitis.  
 491 Currently, she is bedridden, cannot actively move her trunk and limbs, and is being  
 492 fed with the use of a gastrostomy tube. She has strabismus and can control only the

493 movements of the left eye. She communicates only by blinking her eyes ('yes' or  
494 'no' responses) or through slight head movements. She is totally motor dependent.  
495 The family complains mainly about her communication difficulties. When she is  
496 not undergoing rehabilitation treatments, she spends all day watching TV, which is  
497 controlled by a formal caregiver or her mother.

498 • PP5: 46 year-old male.

499 Diagnosed with spinal cord injury (C7 level incomplete) since the age of 16 after  
500 diving into the sea and hitting his spine onto a sandbar. He underwent treatment for  
501 3 years and 6 months at our rehabilitation center. In 2017, he acquired pneumonia  
502 and, as a consequence of constant coughing, the injured vertebrae suffered  
503 consecutive impacts, resulting in spinal cord compression. In May 2018, after being  
504 diagnosed with compressive myelopathy and severe spinal canal stenosis, he  
505 underwent a surgical procedure, receiving pins in the cervical vertebrae. As he  
506 suffered the accident when he was an adolescent, he has learned to adapt to several  
507 activities. However, he only walks short distances with the aid of forearm crutches  
508 or the support of another person. He presents no dexterity in his hands and cannot  
509 make fine grips; gross grasps are made by fitting objects into his hand, whose  
510 fingers remain flexed. The activities that he needs the most assistance with are  
511 grooming, getting dressed, toileting, and use of instruments and equipment that  
512 require coordination and dexterity (knife, remote control, fan, etc.), for which he is  
513 assisted by his fiancée (main caregiver) or his daughters, who are still minors.

514 • PP6: 58 year-old male. 

515 Diagnosed with ALS since April 2017 with onset of symptoms in 2015. He started  
516 with loss of strength in the left hand, reaching the entire left upper limb, followed  
517 by the right upper limb. The lower limbs are not affected. Currently, he does not

518 perform movements of the shoulders and elbows, remaining with the upper limbs  
519 pending. He has reduced strength in the left fingers and cannot move his right hand.  
520 His greatest difficulties regard feeding, grooming, getting dressed, and bathing. He  
521 spends much of the day alone at home watching TV. He has difficulty using the TV  
522 remote control, and often drops it when trying to handle it, or presses the wrong  
523 buttons. He keeps the fan on the floor and turns it on with his foot.

524 In the COPM assessment, which is directed to activities that require the use of  
525 equipment, the volunteers were asked to indicate which activities were important in their  
526 everyday lives. Having ‘control of the TV’ was considered important by all participants  
527 who used the system (PP1, PP3, PP5, and PP6), being able to ‘turn the fan on/off’ was  
528 deemed essential by two participants (PP5 and PP6), and having ‘control of the lights’  
529 was a significant demand for only one of the participants (PP1).

530 The TV is a very popular appliance and an important resource of entertainment.  
531 Thus, the desire to improve control over this appliance by the people with disabilities that  
532 participated in this study is understandable. In the study by Myburg et al. [83], TV control  
533 systems were among the most frequent environment control devices in the population  
534 studied (people with spinal cord injury).

535 Although the system presents more options to control electronic devices, it was  
536 noticed that the volunteers of this study did not use all the possible equipment, according  
537 to assessments of the demand of each participant carried out using the COPM. Several  
538 researchers have reported the significance of considering factors that are important for the  
539 people who will use an AT device [46,48,58] aiming at better adherence and results.

540 Two volunteers (PP1 and PP6) wear glasses. Duchowski [69] points out that the use  
541 of lenses (contact lenses or glasses) can interfere with the eye tracker ability to locate the

542 corneal reflex, as they have reflective surfaces; however, the use of glasses did not  
543 interfere with the performance in using the system in the present study.

544 The way the equipment was organized, on a portable table, allowed the kit (notebook  
545 computer + eye tracker) to adapt itself to the different room configurations of the  
546 participants, with little interference in the organization and dynamic of the homes. The  
547 system was set up in the living room of three participants (PP1, PP5 and PP6) and in the  
548 bedroom of one participant (PP3).

549 At reassessment, volunteers PP1, PP5 and PP6 responded to the questions of the  
550 instruments with the help of the researcher to make markings on paper, and the interview  
551 was answered without help. With regard to volunteer PP3, the interview was conducted  
552 with her mother and, for the other evaluations, the scales were designed in the notebook  
553 computer and the participant was asked to move the mouse cursor with the use of the eye  
554 tracker to indicate the alternative most appropriate for each item evaluated. It was very  
555 difficult to choose the answers because the cursor position showed great variation, but the  
556 COPM was fully answered by the volunteer. The SUS and QUEST 2.0 (Brazilian  
557 version) were answered jointly with the participant's mother. Due to tiredness, her mother  
558 responded to the PIADS based on what she believed her daughter's responses would be.

559 Results of the COPM and the Paired Sample *t*-Test for all participants are shown in  
560 Table 3.

561

562

563

564

565

566 **Table 3. COPM and Paired Sample *t*-Test results of participants who used the**  
 567 **system**

| Volunteer                | Demands               | Performance     |                 | Satisfaction    |                 | Change                       |                              |
|--------------------------|-----------------------|-----------------|-----------------|-----------------|-----------------|------------------------------|------------------------------|
|                          |                       | P1 <sup>a</sup> | P2 <sup>b</sup> | S1 <sup>c</sup> | S2 <sup>d</sup> | P2<br>Total -<br>P1<br>Total | S2<br>Total -<br>S1<br>Total |
| PP1                      | Control of the TV     | 7               | 8               | 5               | 8               |                              |                              |
|                          | Control of the lights | 6               | 7               | 5               | 8               |                              |                              |
|                          | Total score           | 6.5             | 7.5             | 5               | 8               | 1                            | 3                            |
| PP3                      | Control of the TV     | 1               | 7               | 1               | 7               |                              |                              |
|                          | Total score           | 1               | 7               | 1               | 7               | 6                            | 6                            |
| PP5                      | Control of the TV     | 1               | 10              | 5               | 10              |                              |                              |
|                          | Turn the fan on/off   | 1               | 10              | 1               | 10              |                              |                              |
|                          | Total score           | 1               | 10              | 3               | 10              | 9                            | 7                            |
| PP6                      | Control of the TV     | 3               | 9               | 3               | 10              |                              |                              |
|                          | Turn the fan on/off   | 5               | 9               | 3               | 10              |                              |                              |
|                          | Total score           | 4               | 9               | 3               | 10              | 5                            | 7                            |
| <b><i>p</i>-value*</b>   |                       | Performance     |                 | Satisfaction    |                 |                              |                              |
| <b>Control of the TV</b> |                       | 0.045           |                 | 0.009           |                 |                              |                              |
| <b>COPM total score</b>  |                       | 0.050           |                 | 0.009           |                 |                              |                              |

568 <sup>a</sup>P1- initial performance; <sup>b</sup>P2- final performance; <sup>c</sup>S1- initial satisfaction; <sup>d</sup>S2- final  
 569 satisfaction. \* Paired Sample *t*-Test ( $p < 0.05$ ).

570

571 In the COPM, the volunteers self-evaluated their performance (P) in activities they  
 572 considered important and their satisfaction (S) with performance before and after using  
 573 the system using a scale from 1 to 10; the higher the score, the better the performance or  
 574 satisfaction.

575 The final assessments (P2 or S2) of all participants who used the system were higher  
 576 than their initial assessments (P1 or S1). Except for the change in performance of  
 577 volunteer PP1, all other evaluations showed changes greater than two points, which is  
 578 considered by Law et al. [77] as a clinically important change.

579 For the Paired Sample *t*-Test, only the events ‘control of the TV’ and ‘COPM total  
580 score’ were analyzed, as these events were common to all participants.

581 Statistically significant results were observed for performance and satisfaction  
582 regarding ‘control of the TV’ and for total satisfaction after using the system. Borderline  
583 results were obtained with respect to total performance’.

584 Despite the reduced sample size and the short usage time of the AT system, the  
585 results clearly showed that the use of the system provided participants with a new way of  
586 interacting with the environment more actively.

587 For volunteers PP3, PP5 and PP6, the initial evaluation scores indicate that they were  
588 unable to perform the activities or presented great difficulty in performing them, also  
589 reflecting on their low satisfaction with performance. At the final assessment, the scores  
590 reflect that the use of the SE control system enabled better performance and,  
591 consequently, greater satisfaction with performance for the volunteers.

592 Among all the participants, volunteer PP1 was the only one who still has some  
593 manual skills, thus she can operate the TV remote control, although with some difficulty,  
594 but gets tired along the process. Therefore, she presented higher initial scores and smaller  
595 changes at reevaluation.

596 Table 4 shows the results obtained with application of the QUEST 2.0 instrument.

597

598 **Table 4. QUEST 2.0 scores**

| <b>Volunteer</b> | <b>Resource</b> | <b>Service<br/>delivery</b> | <b>Total</b> |
|------------------|-----------------|-----------------------------|--------------|
| <b>PP1</b>       | 4.5             | 5.0                         | 4.7          |
| <b>PP3</b>       | 4.4             | 5.0                         | 4.6          |
| <b>PP5</b>       | 5.0             | 5.0                         | 5.0          |
| <b>PP6</b>       | 5.0             | 5.0                         | 5.0          |

599

600 The assessment related to satisfaction with the AT resource involves eight items,  
601 namely, dimensions, weight, adjustments, safety, durability, simplicity of use, comfort,  
602 and effectiveness [79]. In order to evaluate the items in this category, the volunteers were  
603 asked to take into account the entire set of hardware (gBox, notebook computer, eye  
604 tracker, router, and portable table) and software (equipment control program) installed in  
605 their residences.

606 Assessment of satisfaction with the service provided involves four items, namely,  
607 service delivery, repairs and servicing, professional services, and follow-up services [79],  
608 and the study participants should consider the service provided by the researchers with  
609 regard to installation of the equipment, explanations, training, troubleshooting, and  
610 necessary follow-up during the week they are using it.

611 Results regarding the degree of satisfaction with the SE ranged from 4.4 to the  
612 maximum score, 5.0, with scores below 5.0 referring to difficulties in calibrating the eye  
613 tracker, occasional visual discomfort, and difficulty in using the system (in the case of the  
614 volunteer with the greatest motor impairment).

615  With regard to satisfaction with the service, the average of all volunteers was 5.0, the  
616 highest possible score. Good professionals and services are items appointed by Lenker et  
617 al. [46] as a positive points in the process of obtaining an AT resource, and lead to better  
618 results with use. In contrast, lack of continuous support for the use of AT devices can lead  
619 participants to lose interest in their use [40].

620 The total average of each volunteer varied between 4.6 and 5.0, corresponding to  
621 high levels of satisfaction. This result corroborates those reported in two studies of the  
622 systematic review conducted by Brandt et al. [16] on environmental control systems and  
623 smart homes used by people with disabilities, in which the participants presented high  
624 total average scores for satisfaction with the tested systems.



625 Table 5 presents a distribution of the items that the study participants considered  
 626 important about the SE control system. In such evaluation, each volunteer should indicate  
 627 three items. It can be observed that three of the four volunteers pointed to effectiveness as  
 628 an important feature of the SE tested. This term is defined by Demers et al. [84] as the  
 629 “goal achievement with the AT device” (p.189), reinforcing that the system has met the  
 630 needs of these people.

631

632 **Table 5. Important items regarding the SE system**

| Item                  | Number of citations |
|-----------------------|---------------------|
| Effectiveness         | 3                   |
| Adjustment            | 2                   |
| Simplicity of use     | 2                   |
| Professional services | 2                   |
| Follow-up services    | 1                   |
| Comfort               | 1                   |
| Safety                | 1                   |

633

634 Our findings corroborate the study by Shone Stickel et al. [85], whose participants  
 635 also assessed effectiveness as the most important attribute of electronic AT devices for  
 636 performance of ADL.

637 As for the PIADS instrument, Table 6 presents the score for each subscale and the  
 638 final average of the volunteers.

639

640 **Table 6. PIADS subscale scores**

| Volunteer | Competence | Adaptability | Self-esteem | Average |
|-----------|------------|--------------|-------------|---------|
| PP1       | 2.6        | 3.0          | 3.0         | 2.9     |
| PP3       | 1.3        | 0.7          | 1.8         | 1.3     |
| PP5       | 2.5        | 3.0          | 2.6         | 2.7     |
| PP6       | 2.8        | 3.0          | 2.3         | 2.7     |

641

642 In the PIADS, respondents assessed how they were affected by the SE system in each  
643 of the 26 sentences of the scale ranging from -3.0 to +3.0, with 0 indicating that no effect  
644 was perceived. Participants PP1, PP5 and PP6 had average values close to the maximum  
645 score (3.0), indicating a maximum positive impact with the use of the SEs. They assigned  
646 the highest values to the Adaptability subscale, indicating that with the use of the system  
647 they felt more willing to take risks and more motivated to participate socially [78].  
648 Volunteer PP3 presented the lowest average among the participants. Because she was the  
649 volunteer with the most significant motor impairment, she had more difficulty in  
650 controlling the equipment, getting tired and frustrated sometimes. In addition, this  
651 instrument, as previously mentioned, was answered by her mother based on what she  
652 believed her daughter's assessment would be. Thus, it may not reliably represent the  
653 volunteer's assessment.

654 The developers of this instrument [78] claim that these three subscales are  
655 sufficiently sensitive to assess the psychosocial impact of an AT device or resource on the  
656 user, and are included in the QoL concept. The instrument development study [86] points  
657 out that the longer the period of use, the greater the feeling of competence. The  
658 developers raised two hypotheses for this result: 1) the longer the usage time, the more the  
659 users appreciate the effect; 2) the longer usage time reflects the user's real need for the  
660 device.

661 Due to the short time of use of the SEs in this study (one week), it is not possible to  
662 state that there was a real change in the psychosocial aspects of the participants, but it  
663 indicates a tendency toward this change, in view of the results.

664 Figure 5 illustrates the results of the instrument used to assess the usability of the  
665 system, the System Usability Scale (SUS).

666

667 **Fig 5. SUS results of participants who used the system.**

668

669 The results in Figure 5 show that the participants' average SUS score was 85.6.  
670 According to Bangor, Kortum and Miller [87], products evaluated in the range of 80  
671 points are considered good, and products evaluated in the range of 90 points are  
672 considered exceptional. Thus, the usability of our system was well evaluated. The lowest  
673 evaluation refers, again, to participant PP3, whose answers pointed to some degree of  
674 complexity in the system and the need of a technical person or prior learning. As  
675 previously mentioned, the motor impairment of this participant interfered with the use of  
676 the eye tracker, hindering her control of the SE system. In fact, several factors may have  
677 influenced this difficulty, such as position in bed, control of only one eye, small opening  
678 of the eye sometimes, tiredness with use, and difficulty of caregivers with the use of  
679 computers and programs.

680 Despite the lower ratings assigned by this volunteer, it seems that for all participants,  
681 on average, the assessment instruments showed positive results in relation to occupational  
682 performance, satisfaction with performance, satisfaction with the SE system, and usability  
683 of the system.

684 Many studies have evaluated improvements in these aspects after people with  
685 disabilities used environment control systems or electronic AT devices [12,40,85,88,89],  
686 whereas other studies have assessed ways of interacting with the environment through eye  
687 trackers [90,91]. However, no studies with the same objectives and using the same  
688 methodology of the present research, that is, use of IROG technology for SE control, have  
689 been found for comparison.

690 As the results show better occupational performance, satisfaction with performance  
691 and with the SE, and system usability, it can be concluded that the SE controlled by IROG  
692 evaluated in this research provided people with motor disabilities with more independent  
693 operation and control of the equipment.

694 Information collected through the interviews complemented the assessment  
695 instruments used. All volunteers who used the SE system found it useful, mainly because  
696 it provided them with greater independence and exercise of autonomy in controlling the  
697 equipment, as it can be verified in some of their answers:

698 *“Ah, it is useful in all aspects, right? Turn on, turn off”* (PP1)

699 *“I think it was good. I think (PP3) was happy to get it, right? You saw her expression  
700 of joy, right? So it was (useful). The part that I found most positive is giving autonomy,  
701 right? This is fundamental!”*(PP3’s mother)

702 *“Its ... accessibility to be able to move. (...) it was very useful ... with the difficulty that  
703 I have (...). The facility for you to pick up and do things”* (PP5)

704 *“It brings independence! Not depending on anybody to ‘turn up the volume!’, ‘Switch  
705 channels!’, or ‘turn on the television!’, ‘turn off the television!’”* (PP6)

706

707 These statements corroborate the researched literature [92-95], since independence,  
708 control and privacy are highly important aspects pointed by people with disabilities who  
709 used environment control systems or electronic aids to daily living (EADL).

710 Volunteer PP6’s speech also points to another theme present in the study conducted  
711 by Verdonck, Chard and Nolan [93]: the embarrassment that people with disabilities  
712 present regarding their recurring requests for help, followed by apologies, as they feel  
713 uncomfortable to interrupt their caregivers' routine. According to those authors, the use of

714 EADL changes this dynamic of the relationship, with fewer apologies, less discomfort,  
715 and reduced caregiver burden.

716 As examples of difficulties or aspects that need to be improved in our system, the  
717 volunteers reported the delay to switch TV channels, which are very distant from each  
718 other; feeling tired or presenting a mild headache from using the eye tracker; depending  
719 on a caregiver or family member to start the system and open the CI; complicated  
720 processes for calibrating the eye tracker.

721 In this sense, the following suggestions were made: having a numeric keyboard, so  
722 that the user could click on the desired channel; remove the need to use the notebook  
723 computer keyboard for some tasks, such as when typing the password to access the CI;  
724 make the system simpler and more logical for people who do not have much experience  
725 with computers. Other suggestions that emerged were allow the system to also control the  
726 fixed lighting of the residence and make and receive phone calls via a smartphone.

727 Regarding the user manual, volunteers PP1, PP5 and PP6 reported that they did not  
728 need to access it, because the explanation and training provided by the researcher were  
729 sufficient to use the SE system. Volunteer PP3's mother, on the other hand, reported that  
730 the manual did not clarify her doubts, requiring the presence of one of the researchers for  
731 assistance.

732 The literature highlights how important explanations and training are for  
733 understanding the use and for adherence to the AT resource. Myburg et al. [83] conducted  
734 interviews with people with spinal cord injury who used environment control systems and  
735 found that training was considered crucial for the total integration of the system in their  
736 lives. Participants also stressed that involvement of the occupational therapist in the test,  
737 prescription and configuration of the environment control system is equally important.

738 The system usage records were obtained through the Web application, which enabled  
 739 verification of the number of days that each volunteer effectively used the SE (Table 7).

740

741 **Table 7. Usage registration information obtained through the Web application**

| <b>Volunteer</b> | <b>Number of days of use</b> |
|------------------|------------------------------|
| <b>PP1</b>       | 2                            |
| <b>PP3</b>       | 5                            |
| <b>PP5</b>       | 2                            |
| <b>PP6</b>       | 4                            |

742

743 As it can be observed, although the system remained in each volunteer's home for  
 744 seven days, it was not used every day. The justifications given by the volunteers included  
 745 trips, medical or rehabilitation consultations, and other leisure activities, such as going to  
 746 church or taking short tours.

747 However, some other hypotheses that may have influenced the relationship between  
 748 the user and the system were raised, corroborating the literature: the fact that the system  
 749 has limitations, not allowing total independence and requiring a caregiver or family  
 750 member to activate part of the equipment (turn on the notebook computer, correctly  
 751 position the eye tracker in relation to the user and calibrate it) [94,96] or, when there is  
 752 presence of some motor disability, people prefer to behave as they are more accustomed  
 753 [97]. Another possibility is that, if there were a family member in the same room  
 754 watching TV together with the participant, the control of the device would probably be  
 755 performed by this person, using the standard TV remote control.

756 Table 8 shows the data of the participants who did not use the system.

757

758

759

760 **Table 8. Data of volunteers who did not use the system**

| <b>Volunteer</b> | <b>Age</b> | <b>Gender</b>  | <b>Education level</b>    | <b>Caregiver</b>             | <b>Health Condition</b>       | <b>Time elapsed since diagnosis</b> |
|------------------|------------|----------------|---------------------------|------------------------------|-------------------------------|-------------------------------------|
| PP2              | 68         | F <sup>a</sup> | Complete higher education | Formal caregivers            | Multiple Sclerosis            | 4 years                             |
| PP4              | 48         | M <sup>b</sup> | Complete high school      | Mother and formal caregivers | Spinal Cord Injury (C5 level) | 2 years                             |

761 <sup>a</sup>F – Female; <sup>b</sup>M – Male.

762

763 At the initial assessment using the COPM, both PP2 and PP4 reported that watching  
764 TV was a very important activity in their everyday lives, but that they were not satisfied  
765 with the way they performed this activity. Thus, the TV was the only device connected to  
766 the gBox for control.

767 Table 9 presents the results of the FIM<sup>TM</sup> with respect to functionality.

768

769 **Table 9. FIM<sup>TM</sup> results of the participants who did not use the system**

| <b>Participant</b> | <b>Motor FIM<sup>TM</sup></b> | <b>Cognitive FIM<sup>TM</sup></b> | <b>Total FIM<sup>TM</sup></b> |
|--------------------|-------------------------------|-----------------------------------|-------------------------------|
| <b>PP2</b>         | 26/91                         | 35/35                             | 61/126                        |
| <b>PP4</b>         | 13/91                         | 35/35                             | 48/126                        |

770

771 According to the FIM<sup>TM</sup> data, both volunteers (PP2 and PP4) had need for maximum  
772 assistance to perform motor activities and presented total independence for cognitive  
773 activities. A brief description of each of these participants is presented ahead:

774

- 775 • PP2: 68 year-old female.

776 Diagnosed with MS since 2008 with onset of symptoms in 2004, presenting  
777 numbness in the limbs and optic neuritis. She used to live in another state and  
778 moved after requests by her children for diagnostic investigation and treatment. She

779 spends most of the day in her bedroom, sitting in the armchair and watching TV.  
780 She is dependent regarding all ADL and does not walk alone. She is able to perform  
781 some movements with her upper limbs, but with little amplitude and strength, and  
782 handles the smartphone and the TV remote control with difficulty. She complains  
783 mainly about lack of independence and always needing to ask for help. She has two  
784 married children, but lives in an apartment only with formal caregivers. She  
785 underwent training, but attempts to train her caregivers were unsuccessful. One of  
786 them reported not knowing how to use a computer and kept distance, whereas the  
787 other briefly stayed in the bedroom and did not wait until the end of the explanation.  
788 At reassessment, PP2 stated that she found the equipment useful, responding  
789 positively to all the assessment instruments. However, when downloading the system  
790 data records through the Web application, it was found that she did not use it at all.  
791 Subsequently, the occupational therapist who assists her weekly reported that she has  
792 a depressed mood, difficulty in accepting the diagnosis, and a high expectation of  
793 improvement. During the semi-structured interview, she mentioned difficulties to  
794 manipulate the computer, start using it, without the assistance of the caregivers.

795 • - PP4: 48 year-old male.

796 Diagnosed with spinal cord injury (C5 level) after a gunshot wound during a  
797 robbery in 2016. He is very dependent regarding performance of ADL, and needs  
798 assistance to carry out all activities. During the day, he remains seated in an  
799 armchair in the living room watching TV. His main complaint is having to depend  
800 on others for everything. He was married, but his wife filed for divorce five months  
801 after the accident. Currently, he is living with his mother, who helps him, but he  
802 also has formal caregivers hired by his health medical organization. On the day of  
803 installation and training, he seemed interested and showed that he understood the



804 system operation, but his caregiver showed no interest. At reassessment, he  
805 responded to all the instrument questions and reported having used the SE during all  
806 days of the week. However, no data were found in the system usage record. In the  
807 interview, he reported lack of total independence as a difficulty with the equipment.

808 Both of these participants present some similar characteristics that may have  
809 contributed to not using the equipment: they have difficulty dealing with the diagnosis or  
810 with their current health condition; caregivers not close or not engaged in this additional  
811 task; they report that the equipment does not allow total independence and that they have  
812 little knowledge of technology, limited to communication through the smartphone.

813 Costa et al. [97] found some factors that can contribute to the understanding of the  
814 non-use of SEs: lack of equipment functionality (for not providing the desired  
815 independence), difficulty in use, embarrassment in using the device, lack of support from  
816 family members, lack of user motivation. Their study focused on other equipment, but it  
817 gives evidence of important aspects that can lead to the non-use or abandonment of AT  
818 devices.

819 With regard to non-acceptance of diagnoses, studies have shown that this is an  
820 important factor to be considered when prescribing or selecting an AT device or resource  
821 [49,98]; however, in the present study, this information only appeared at the time of  
822 reevaluation.

823 Wessels et al. [49] reported that there is a difference in the way the AT resource will  
824 be viewed between people who were born with a disability (for them, technology opens a  
825 new range of possibilities) and those who have acquired a disability (because, for them,  
826 technology will never replace the lost function).

827 Volunteers PP2 and PP4 are in the second group, since they acquired the disability as  
828 adults. A recurring line in the interviews is that they were very active and independent

829 people in the past, and now they find themselves depending on others for practically all  
830 activities. For them, in addition to the loss of independence, the disability has also brought  
831 other types of losses, such as moving from their hometowns, changing their standard of  
832 living, ending their relationships, or losing their jobs. Such cases often result in periods of  
833 depression [49]. In this sense, for these people, it is hypothesized that they would only  
834 benefit from technology if their dependency could be completely reversed.

835 Another associated factor that may have contributed to non-use of the SE is that, for  
836 many people, the AT device highlights the disability [42,47,98]. A study conducted by  
837 Verza et al. [98] with patients diagnosed with MS found that 30.3% of the reasons for  
838 abandoning or not using an AT device are due to the patient's non-acceptance. Those  
839 authors explain that, although the AT device is seen as a possibility to increase  
840 functionality, it can be interpreted by the patient as a validation of their disability and loss  
841 of independence, resulting in decreased self-esteem.

842 It should be noted that, although the system registers activation of the equipment, this  
843 information was not passed on to the participants, so that the use of the system was based  
844 on their real needs and desires, and not on the fact that they felt obliged to use it.

845 It is worth restating that, in view of therapeutic objectives, it is important that the  
846 professional involved perform a wide and in-depth assessment of the patient's real  
847 demands, their expectations, and possibilities of the proposed AT device, as well as  
848 consider their participation in the choice. These points are important to ensure acceptance  
849 and continuity of use, since abandonment can represent a waste of time and financial  
850 expenses (their own or of the government) [40,48,50,51].

851

852

853

## 854 **Conclusions**

855       Volunteers who used the IROG-controlled SE system showed better occupational  
856 performance and satisfaction with performance. In addition, the psychosocial impact of  
857 using this system was close to the maximum and, for three participants, satisfaction with  
858 the system was well evaluated and the system was considered of good usability. The  
859 volunteer who had a more pronounced motor impairment and, therefore, more difficulty  
860 in using the system, rated its psychosocial impact and usability with lower scores.

861       Suggestions for system improvement were associated with changes in the interface  
862 aiming at fewer commands to select TV channels; eliminating the need to use the  
863 notebook computer keyboard as much as possible and simplifying steps, enabling  
864 greater independence for people with disability to use the system; increasing the  
865 possibilities of equipment and devices that can be controlled (e.g., fixed residential  
866 lighting and smartphones).

867       The two participants who did not use the system presented characteristics such as  
868 non-acceptance of their diagnoses or current health conditions, weak relationship with  
869 caregivers, and need for assistance with using the equipment. In contrast, the fact that an  
870 AT device possibly reinforces dependence may have corroborated these results.

871       The HAAT model was used as a basis for definition of the study methodology  
872 aiming to achieve its objectives.

873       Although the AT resource (SE system) was previously defined, in order to be  
874 evaluated the choice of volunteers was not random, and professionals were asked to  
875 indicate the possible participants. Regarding the Activity component, the activities  
876 considered important for each participant (controlling the TV for entertainment,  
877 controlling lighting and/or fan) were evaluated according to their wishes. Although  
878 there were more possibilities of equipment available for control, only those that the

879 participant was interested in were installed. Still in the Activity component, it was  
880 considered the most familiar place to conduct the research, that is, each of the  
881 volunteer's homes.

882       Regarding the Human component, the motor and cognitive skills of the volunteer  
883 were taken into account. As the study objective was to evaluate the use of the system by  
884 people with severe motor disabilities, in the least intrusive way possible, the eye tracker  
885 using IROG technology was defined as the most suitable device for this purpose.  
886 Motivation to resume performance of the activities was assessed through the COPM in  
887 order to cover the important activities to be carried out.

888       With respect to the Context component, it was noticed that the volunteers who had  
889 greater social support (from family members and/or formal caregivers) actually used the  
890 SE and were able to provide a more in-depth assessment. Those who did not have this  
891 support, or had it in a weakened way, did not use the SE.

892       Finally, with regard to the Assistive Technology component, it was evaluated that  
893 the SE system functioned as a facilitator to carry out the desired activities, enabling  
894 greater exercise of autonomy and independence.

895       Concerning the ICF, its components can also be broken down into the elements of  
896 this research. Health Condition considered the disability or the diagnosis of the  
897 participants. In Body Functions and Structures, the movement limitations resulting from  
898 the participants' health conditions interfered in the way each of them interacted with the  
899 electronic equipment. Activities important for the volunteers and their Participation  
900 were assessed through the FIM<sup>TM</sup> and COPM instruments. Personal Factors (satisfaction  
901 and psychosocial impact) were verified using the QUEST 2.0 and PIADS instruments.  
902 Finally, with regard to Environmental Factors, the SE system, as in the HAAT model, is  
903 considered a facilitator, and its usability was assessed through the SUS scale.

904           Considering that disability is indicated by the HAAT model and the ICF as inherent  
905 in social structures, and not in the person, the results found suggest that the SE system  
906 enabled reduction in the incapacity of the volunteers, who thus had greater participation  
907 in related activities.

908           The main contribution of this study was the wide evaluation of equipment that aims  
909 to allow greater independence for people with severe motor disabilities, from the point  
910 of view of its operation and usability, as well as the benefits it provided to the people  
911 who used it. Several assessment instruments were used to achieve the study objectives.  
912 In addition, a system user manual containing the steps for its effective use was also  
913 produced.

914           For professionals, this study highlights the importance of a good evaluation for the  
915 prescription and development of AT resources, as well as new possibilities to provide  
916 people with severe motor disabilities with greater independence to carry out their  
917 everyday activities with regard to equipment control, avoiding abandonment or non-use.

918           Future studies with larger samples and longer duration should be conducted,  
919 expanding the possibilities of controlled equipment and devices, in order to understand  
920 whether the benefits remain in long term.

921

## 922 **Patents**

923           The gBox patent, together with the environment control system named “Remote  
924 micro-controlled device for charging residential loads via the Internet with emitter and  
925 receiver of commands via integrated infrared”, was submitted to the Institute of  
926 Technological Innovation – INIT at UFES, Brazil, and evaluation is under process.

927

928

## 929 **Acknowledgments**

930 The authors would like to thank all the professionals and participants involved in this  
931 study for their contribution.

932

## 933 **References**

- 934 1. Kadam R, Mahamuni P, Parikh Y. Smart Home System. International Journal of  
935 Innovative Research in Advanced Engineering. 2015; 2:81-86.
- 936 2. Rivera-Illingworth F, Callaghan V, Hagrais H. A neural network agent based  
937 approach to activity detection in AmI environments. In: Proceedings of IEEE  
938 International Workshop on Intelligent Environments; 28-29th June 2005;  
939 Colchester (United Kingdom). Institution of Engineering and Technology; 2005. 1-  
940 12. doi: 10.1049/ic:20050222.
- 941 3. Huang B, Tian G, Wu H, Zhou F. A method of abnormal habits recognition in  
942 intelligent space. Engineering Applications of Artificial Intelligence. 2014; 29:125-  
943 133. doi: 10.1016/j.engappai.2013.12.010.
- 944 4. Lupalu J, Bouchard K, Bouzouane A, Bouchard B, Giroux B. Unsupervised mining  
945 of activities for smart home prediction. Procedia Computer Science. 2013; 19:503-  
946 510. doi: https://doi.org/10.1016/j.procs.2013.06.067.
- 947 5. Rashidi P, Cook DJ, Holder LB, Schmitter-Edgecombe M. Discovering activities to  
948 recognize and track in a smart environment. IEEE Transactions on Knowledge and  
949 Data Engineering. 2011; 23:527-539. doi: 10.1109/TKDE.2010.148.
- 950 6. Luhr S, West G, Venkatesh S. Recognition of emergent human behaviour in a smart  
951 home: A data mining approach. Pervasive and Mobile Computing. 2007; 3:95-116.  
952 doi: 10.1016/j.pmcj.2006.08.002.

- 953 7. Tello RJMG, Bissoli ALC, Ferrara F, Müller S, Ferreira A, Bastos-Filho TF.  
954 Development of a Human Machine Interface for Control of Robotic Wheelchair  
955 and Smart Environment. IFAC-PapersOnLine. 2015; 48:136-141. doi:  
956 10.1016/j.ifacol.2015.12.023.
- 957 8. Hussein A, Adda M, Atieh M, Fahs W. Smart Home Design for Disabled People  
958 based on Neural Networks. Procedia Computer Science. 2014; 37:117-126. doi:  
959 10.1016/j.procs.2014.08.020.
- 960 9. Rampinelli M, Covre VB, Queiroz FM, Vassallo RF, Bastos-Filho TF, Mazo M.  
961 An intelligent space for mobile robot localization using a multi-camera system.  
962 Sensors. 2014; 14:15039-15064. doi: 10.3390/s140815039.
- 963 10. Adami I, Antona M, Stephanidis C. Ambient Assisted Living for the Motor  
964 Impaired. In. Koroupetroglou G, editor. Assistive Technologies, Disability  
965 Informatics and Computer Access for Motor Limitations. USA: IGI Global; 2013,  
966 pp. 76-104.
- 967 11. Bastos Filho TF, Fernandes MR, Lucena-Jr VF, Pereira CE. Proposal of  
968 Architecture for Integration of a Wheelchair in an Intelligent Space. In: Proceedings  
969 of 4th IEEE Biosignals and Biorobotics Conference (ISSNIP); 18-20th February  
970 2013; Rio de Janeiro-RJ (Brazil); 2013. 6-11.
- 971 12. Ocepek J, Roberts AEK, Vidmar G. Evaluation of treatment in the smart home IRIS  
972 in terms of functional independence and occupational performance and satisfaction.  
973 Computational and Mathematical Methods in Medicine. 2013; 2013:10 pages. doi:  
974 10.1155/2013/926858.
- 975 13. Gentry T. Smart homes for people with neurological disability: State of the art.  
976 NeuroRehabilitation. 2009; 25:209-217. doi: 10.3233/NRE-2009-0517.

- 977 14. Muñoz D, Fortes P. O princípio da autonomia e o consentimento livre e esclarecido.  
978 In. Iniciação à Bioética. Costa SIF, Oselka G, Garrafa V, coordinators. Brasília:  
979 CFM; 1998. pp. 53-70.
- 980 15. Martin S, Kelly G, Kernohan WG, McCreight B, Nugent C. Smart home  
981 technologies for health and social support. Cochrane Database of Systematic  
982 Reviews. 2008; 4:1-10. doi: 10.1002/14651858.CD006412.pub2.
- 983 16. Brandt Å, Samuelsson K, Töytäri O, Salminen A-L. Activity and participation,  
984 quality of life and user satisfaction outcomes of environmental control systems and  
985 smart home technology: a systematic review. Disability and Rehabilitation:  
986 Assistive Technology. 2011; 6(3):189-206. doi: 10.3109/17483107.2010.532286.
- 987 17. Marikyan D, Papagiannidis S, Alamanos E. A systematic review of the smart home  
988 literature: A user perspective. Technological Forecasting & Social Change. 2019;  
989 138:139-154. doi: 10.1016/j.techfore.2018.08.015.
- 990 18. Bissoli A, Lavino-Junior D, Sime M, Encarnação L, Bastos-Filho T. A Human-  
991 Machine Interface Based on Eye Tracking for Controlling and Monitoring a Smart  
992 Home Using the Internet of Things. Sensors. 2019; 19:859-884. doi:  
993 10.3390/s19040859.
- 994 19. World Health Organization – WHO. World Report on Disability. WHO Press;  
995 Printed in Malta; 2011. Available from:  
996 [https://www.who.int/disabilities/world\\_report/2011/en/](https://www.who.int/disabilities/world_report/2011/en/).
- 997 20. Siqueira SC, Vitorino PVO, Prudente COM, Santana TS, Melo GF. Quality of life  
998 of patients with Amyotrophic Lateral Sclerosis. Rev Rene. 2017; 18(1):139-146.  
999 doi: 10.15253/2175-6783.2017000100019.
- 1000 21. Marrie RA, Cutter GR, Tyry T, Cofield SS, Fox R, Salter A. Upper limb  
1001 impairment is associated with use of assistive devices and unemployment in



- 1002 multiple sclerosis. *Multiple Sclerosis and Related Disorders*. 2017; 13:87-92. doi:  
1003 10.1016/j.msard.2017.02.013.
- 1004 22. Shamshiri H, Fatehi F, Abolfazli R, Harirchian MH, Sedighi B, Zamani B, et al.  
1005 Trends of quality of life changes in amyotrophic lateral sclerosis patients. *J Neurol*  
1006 *Sci*. 2016; 368:35-40. doi: 10.1016/j.jns.2016.06.056.
- 1007 23. Bertoni R, Lamers I, Chen CC, Feys P, Cattaneo D. Unilateral and bilateral upper  
1008 limb dysfunction at body functions, activity and participation levels in people with  
1009 multiple sclerosis. *Mult Scler*. 2015; 21(12):1566-1574. doi:  
1010 10.1177/1352458514567553.
- 1011 24. Souza FDA, Cruz DMC, Ferrigno ISV, Tsukimoto GR, Figliolia CS. Correlação  
1012 entre papéis ocupacionais e independência de usuários com lesão medular em  
1013 processo de reabilitação. *Mundo da Saúde*. 2013; 37(2):166-175. doi:  
1014 10.15343/0104-7809.2013372166175.
- 1015 25. Riazi A, Bradshaw SA, Playford ED. Quality of life in the care home: a qualitative  
1016 study of the perspectives of residents with multiple sclerosis. *Disabil Rehabil*. 2012;  
1017 34(24):2095-2102. doi: 10.3109/09638288.2012.672539.
- 1018 26. Lee YC, Chen YM, Hsueh IP, Wang YH, Hsieh CL. The impact of stroke: insights  
1019 from patients in Taiwan. *Occup Ther Int*. 2010; 17(3):152-158. doi:  
1020 10.1002/oti.301.
- 1021 27. Wolf TJ, Baum C, Connor LT. Changing face of stroke: Implications for  
1022 occupational therapy practice. *AJOT*. 2009; 63:621-625. doi:  
1023 10.5014/ajot.63.5.621.
- 1024 28. Groot V, Beckerman H, Lankhorst GJ, Polman CH, Bouter LM. The initial course  
1025 of daily functioning in multiple sclerosis: a three-year follow-up study. *Mult Scler*.  
1026 2005; 11:713-718. doi: 10.1191/1352458505ms1238oa.

- 1027 29. Pedretti LW, Early ME. Desempenho ocupacional e modelos de prática para  
1028 disfunção física. In. Pedretti LW, Early ME. Terapia ocupacional: capacidades  
1029 práticas para disfunções físicas. São Paulo: Roca; 2004.
- 1030 30. Camacho A, Esteban J, Paradas C. Informe de la Fundación del Cerebro sobre el  
1031 impacto social de la esclerosis lateral amiotrófica y las enfermedades  
1032 neuromusculares. *Neurología*. 2015; 33:35-46. doi: 10.1016/j.nrl.2015.02.003.
- 1033 31. World Health Organization – WHO. International Classification of Functioning,  
1034 Disability and Health: ICF. World Health Organization; 2001.
- 1035 32. Farias N, Buchalla CM. A Classificação Internacional de Funcionalidade,  
1036 Incapacidade e Saúde da Organização Mundial da Saúde: conceitos, usos e  
1037 perspectivas. *Rev Bras Epidemiol*. 2005; 8(2):187-193. doi: 10.1590/S1415-  
1038 790X2005000200011.
- 1039 33. Dahl TH. International classification of functioning, disability and health: an  
1040 introduction and discussion of its potential impact on rehabilitation services and  
1041 research. *J Rehabil Med*. 2002; 34:201-204. doi: 10.1080/165019702760279170.
- 1042 34. Brasil. CORDE. Comitê de Ajudas Técnicas, ATA VII; 2008. Available from:  
1043 <[http://www.mj.gov.br/sedh/ct/corde/dpdh/corde/comite\\_at.asp](http://www.mj.gov.br/sedh/ct/corde/dpdh/corde/comite_at.asp)>.
- 1044 35. United States Congress. Assistive Technology Act of 2004: Amendment to the  
1045 assistive technology act of 1998 (Public Law 108–364); 2004.
- 1046 36. Luzo MCM, Mello MAF, Capanema VM. Recursos tecnológicos em terapia  
1047 ocupacional – órteses e tecnologia assistiva. In. De Carlo MMRP, Luzo MCM,  
1048 organizers. *Terapia ocupacional: reabilitação física e contextos hospitalares*. São  
1049 Paulo: Roca; 2004. pp. 99-126.
- 1050 37. Cook A, Polgar J. *Assistive Technologies: Principles and Practice*. 4th ed. St.  
1051 Louis: Mosby Elsevier; 2015.

- 1052 38. Pelosi MB, Nunes L. Formação em serviço de profissionais da saúde na área de  
1053 tecnologia assistiva: o papel do terapeuta ocupacional. *Rev Bras Crescimento*  
1054 *Desenvolv Hum.* 2009; 19(3):435-444.
- 1055 39. Borg J, Lindström A, Larsson S. Assistive technology in developing countries:  
1056 national and international responsibilities to implement the Convention on the  
1057 Rights of Persons with Disabilities. *Viewpoint. Lancet.* 2009; 374(28):1863-1865.  
1058 doi: 10.1016/S0140-6736(09)61872-9.
- 1059 40. Jamwal R, Callaway L, Ackerl J, Farnworth L, Winkler D. Electronic assistive  
1060 technology used by people with acquired brain injury in shared supported  
1061 accommodation: Implications for occupational therapy. *British Journal of*  
1062 *Occupational Therapy.* 2017; 80(2):89-98. doi: 10.1177/0308022616678634.
- 1063 41. Cruz DMC, Ioshimoto MTA. Tecnologia assistiva para as atividades de vida diária  
1064 na tetraplegia completa C6 pós-lesão medular. *Rev Triang: Ens. Pesq. Ext.*  
1065 *Uberaba.* 2010; 3(2):177-190. doi: 10.18554/rt.v3i2.153.
- 1066 42. Andrade VS, Pereira LSM. Influência da tecnologia assistiva no desempenho  
1067 funcional e na qualidade de vida de idosos comunitários frágeis: uma revisão  
1068 bibliográfica. *Rev Bras Geriatr Gerontol.* 2009; 12(1):113-122. doi: 10.1590/1809-  
1069 9823.2009120110.
- 1070 43. Plotkin A, Sela L, Weissbrod A, Kahana R, Haviv L, Yeshurun Y, et al. Sniffing  
1071 enables communication and environmental control for the severely disabled. *PNAS.*  
1072 2010; 107(32):14413-14418. doi: 10.1073/pnas.1006746107.
- 1073 44. Lulé D, Zickler C, Häcker S, Bruno MA, Demertzi A, Pellas F, et al. Life can be  
1074 worth living in locked-in syndrome. *Progress in Brain Research.* 2009; 177:339-  
1075 351. doi: 10.1016/S0079-6123(09)17723-3.

- 1076 45. Dusik CL, Santarosa L. Mousekey, Teclado Virtual Silábico-Alfabético:  
1077 Tecnología Asistiva para Personas con Deficiencia Física. In: Memorias XVIII  
1078 Congreso Internacional de Informática Educativa. Nuevas Ideas en Informática  
1079 Educativa 9 – TISE 2013; Porto Alegre-Brasil. Digitalizado en Chile; 2013. 90-98.
- 1080 46. Lenker JA, Harris F, Taugher M, Smith RO. Consumer perspectives on assistive  
1081 technology outcomes. *Disabil Rehabil Assist Technol.* 2013; 8(5):373-380. doi:  
1082 10.3109/17483107.2012.749429.
- 1083 47. Squires LA, Williams N, Morrison VL. Matching and accepting assistive  
1084 technology in multiple sclerosis: A focus group study with people with multiple  
1085 sclerosis, carers and occupational therapists. *Journal of Health Psychology.* 2016;  
1086 24:1-15. doi: 10.1177/1359105316677293.
- 1087 48. Cruz DMC, Emmel MLG, Manzini MG, Mendes PVB. Assistive technology  
1088 accessibility and abandonment: challenges for occupational therapists. *The Open  
1089 Journal of Occupational Therapy.* 2016; 4(1):Article 10. doi: 10.15453/2168-  
1090 6408.1166.
- 1091 49. Wessels R, Dijcks B, Soede M, Gelderblom GJ, De Witte L. Non-use of provided  
1092 assistive technology devices: a literature overview. *Technology and Disability.*  
1093 2003; 15(4):231-238. doi: 10.3233/TAD-2003-15404.
- 1094 50. Riemer-Reiss ML, Wacker RR. Factors associated with assistive technology  
1095 discontinuance among individuals with disabilities. *Journal of Rehabilitation.* 2000;  
1096 66(3):44-50.
- 1097 51. Phillips B, Zhao H. Predictors of assistive technology abandonment. *Assistive  
1098 Technology.* 1993; 5(1):36-45. doi: 10.1080/10400435.1993.10132205.

- 1099 52. Alves ACJ, Matsukura TS. Revisão sobre avaliações para indicação de dispositivos  
1100 de tecnologia assistiva. *Rev Ter Ocup Univ São Paulo*. 2014; 25(2):199-207. doi:  
1101 10.11606/issn.2238-6149.v25i2p199-207.
- 1102 53. Lovarini M, Mccluskey A, Curtin M. Editorial: Critically appraised papers. Limited  
1103 high-quality research in the effectiveness of assistive technology. *Aust Occup Ther*  
1104 *J*. 2006; 50(1):50.
- 1105 54. Gelderblom GJ, De Witte LP. The assessment of assistive technology outcomes,  
1106 effects and costs. *Technol and Disabil*. 2002; 14(3):91-94. doi: 10.3233/tad-2002-  
1107 14302.
- 1108 55. Alper S, Raharinirina S. Assistive technology for individuals with disabilities: a  
1109 review and synthesis of the literature. *Journal of Special Education Technology*.  
1110 2006; 21(2):47-64. doi: 10.1177/016264340602100204.
- 1111 56. Kinney A, Goodwin DM, Gitlow L. Measuring assistive technology outcomes: a  
1112 user centered approach. *Assistive Technology Outcomes and Benefits*. 2016; 10:94-  
1113 110.
- 1114 57. Peterson DB, Murray GC. Ethics and assistive technology service provision.  
1115 *Disabil Rehabil Assist Technol*. 2006; 1:59-67. doi: 10.1080/09638280500167241.
- 1116 58. Rocha EF, Castiglioni MC. Reflexões sobre recursos tecnológicos: ajudas técnicas,  
1117 tecnologia assistiva, tecnologia de assistência e tecnologia de apoio. *Rev Ter Ocup*  
1118 *Univ São Paulo*. 2005; 16(3):97-104. doi: 10.11606/issn.2238-6149.v16i3p97-104.
- 1119 59. Netten JJ, Dijkstra PU, Geertzen JHB, Postema K. What influences a patient's  
1120 decision to use custom-made orthopaedic shoes? *BMC Musculoskeletal Disorders*.  
1121 2012; 13:92. doi: 10.1186/1471-2474-13-92.

- 1122 60. Zhao Y, Zhang X, Crabtree J. Human-computer interaction and user experience in  
1123 smart home research: a critical analysis. *Issues in Information Systems*. 2016;  
1124 17(III):11-19.
- 1125 61. Cook A, Polgar J. *Cook and Hussey's Assistive Technologies: Principles and*  
1126 *Practice*. 3rd ed. St. Louis: Mosby Elsevier; 2008.
- 1127 62. Rampinelli M, Bastos TF, Vassallo RF, Pizarro D. Implementation of an intelligent  
1128 space for localizing and controlling a robotic wheelchair. In: 2012 ISSNIP  
1129 Biosignals and Biorobotics Conference: Biosignals and Robotics for Better and  
1130 Safer Living (BRC); 9-11th January 2012; Manaus-Brazil: IEEE – Institute of  
1131 Electrical and Electronics Engineers; 2012. 1-4. doi: 10.1109/BRC.2012.6222187.
- 1132 63. Lee JH, Hashimoto H. Intelligent Space: concept and contents. *Advanced Robotics*.  
1133 2002; 16(3):265-280. doi: 10.1163/156855302760121936.
- 1134 64. Aarts EH, Encarnação JL. Into Ambient Intelligence. In: Aarts EH, Encarnação JL,  
1135 editors. *True visions: The emergence of ambient intelligence*. Springer:  
1136 Netherlands; 2008. pp. 1-16.
- 1137 65. Aldrich F. Smart homes: past, present and future. In: Harper R, editor. *Inside the*  
1138 *Smart Home*. Springer: London; 2003. pp. 17-39.
- 1139 66. Ding Z, Luo J, Deng H. Accelerated exhaustive eye glints localization method for  
1140 infrared video oculography. In: SAC '18 – Proceedings of the 33rd Annual ACM  
1141 Symposium on Applied Computing; April 2018; Pau France. New York-NY  
1142 (United States of America): Association for Computing Machinery; 2018. 620–627.  
1143 doi: <https://doi.org/10.1145/3167132.3167200>.
- 1144 67. Eid MA, Giakoumidis N, El-Saddik A. A Novel Eye-Gaze-Controlled Wheelchair  
1145 System for Navigating Unknown Environments: Case Study with a Person with  
1146 ALS. *IEEE Access*. 2016; 4:558-573. doi:10.1109/ACCESS.2016.2520093.

- 1147 68. Giannotto EC. Uso de rastreamento do olhar na avaliação da experiência do tele-  
1148 usuário de aplicações de TV interativa. M.Sc. Thesis, Polytechnic School of the  
1149 University of São Paulo. Department of Computer Engineering and Digital  
1150 Systems. 2009, 290 p. Available from:  
1151 <https://teses.usp.br/teses/disponiveis/3/3141/tde-15042009-151212/pt-br.php>.
- 1152 69. Duchowski AT. Eye tracking methodology: Theory and practice. 2nd ed. London:  
1153 Springer-Verlag; 2007.
- 1154 70. Anders S, Weiskopf N, Lule D, Birbaumer N. Infrared oculography—validation of  
1155 a new method to monitor startle eyeblink amplitudes during fMRI. *NeuroImage*.  
1156 2004; 22(2):767-770. doi: 10.1016/j.neuroimage.2004.01.024.
- 1157 71. Sharma A, Abrol P. Eye gaze techniques for human computer interaction: a  
1158 research survey. *International Journal of Computer Applications*. 2013; 71(9):18-  
1159 29. doi: 10.5120/12386-8738.
- 1160 72. Van Es MA, Hardiman O, Chio A, Al-Chalabi A, Pasterkamp RJ, Veldink JH, et al.  
1161 Amyotrophic lateral sclerosis. *The Lancet*. 2017; 390(10107):2084-2098. doi:  
1162 10.1016/S0140-6736(17)31287-4.
- 1163 73. Tobii Gaming. Tobii Eye Tracker 4C. Available from:  
1164 <https://gaming.tobii.com/product/tobii-eye-tracker-4c/>. Access in: February 24,  
1165 2019.
- 1166 74. Tobii Dynavox. Gaze Point. Available from: [https://www.tobiidynavox.com/en-](https://www.tobiidynavox.com/en-us/software/free-resources/gaze-point-1/)  
1167 [us/software/free-resources/gaze-point-1/](https://www.tobiidynavox.com/en-us/software/free-resources/gaze-point-1/). Access in: February 24, 2019.
- 1168 75. Riberto M, Miyazaki MH, Jucá SSH, Sakamoto H, Pinto PPN, Battistella LR.  
1169 Validação da Versão Brasileira da Medida de Independência Funcional. *Acta*  
1170 *Fisiatr*. 2004; 11(2):72-76. doi: 10.5935/0104-7795.20040003.

- 1171 76. Linacre JM, Heinemann AW, Wright BD, Granger CV, Hamilton BB. The structure  
1172 and stability of the Functional Independence Measure. *Arch Phys Med Rehabil.*  
1173 1994; 75:127-132. doi: 10.1016/0003-9993(94)90384-0.
- 1174 77. Law M, Baptiste S, Carswell A, McColl M, Polatajko H, Pollock N. *Medida*  
1175 *canadense de desempenho ocupacional (COPM)*. Magalhães LC, Magalhães, LV,  
1176 Cardoso AA, organizers and translators. Belo Horizonte: Ed UFMG; 2009.
- 1177 78. Jutai J, Day H. Psychosocial Impact of Assistive Devices Scale (PIADS). *Technol*  
1178 *and Disabil.* 2002; 14:107-111. doi: 10.1037/t45599-000.
- 1179 79. Demers L, Weiss-Lambrou R, Ska B. The Quebec User Evaluation of Satisfaction  
1180 with Assistive Technology (QUEST 2.0): an overview and recent progress. *Technol*  
1181 *and Disabil.* 2002; 14:101-105. doi: 10.13072/midss.298.
- 1182 80. Carvalho KEC, Gois Junior MB, Sá KN. Tradução e validação do Quebec User  
1183 Evaluation of Satisfaction with Assistive Technology (QUEST 2.0) para o idioma  
1184 português do Brasil. *Rev. Bras. Reumatol.* 2014; 54(4):260-267. doi:  
1185 10.1016/j.rbr.2014.04.003.
- 1186 81. Brooke J. SUS: a "quick and dirty" usability scale. In: Jordan PW, Thomas B,  
1187 McClelland IL, Weerdmeester B, editors. *Usability Evaluation in Industry.*  
1188 London: Taylor and Francis; 1996. 189-194.
- 1189 82. Calvo A, Chiò A, Castellina E, Corno F, Farinetti L, Ghiglione P, et al. Eye  
1190 tracking impact on Quality-of-life of ALS patients. In: *Computers Helping People*  
1191 *with Special Needs. Proceedings of 11th International conference on computers*  
1192 *helping people with special needs; 9-11th July 2008; Linz (Austria): Springer-*  
1193 *Verlag Berlin Heidelberg; 2008. 70-77. doi: 10.1007/978-3-540-70540-6.*
- 1194 83. Myburg M, Allan E, Nalder E, Schuurs S, Amsters D. Environmental control  
1195 systems – the experiences of people with spinal cord injury and the implications for



- 1196 prescribers. *Disability and Rehabilitation: Assistive Technology*. 2017; 12(2):128-  
1197 136. doi: 10.3109/17483107.2015.1099748.
- 1198 84. Demers L, Wessels R, Weiss-Lambrou R, Ska B, de Witte LP. Key dimensions of  
1199 client satisfaction with assistive technology: a cross-validation of a Canadian  
1200 measure in the Netherlands. *J Rehabil Med*. 2001; 33:187-191. doi:  
1201 10.1080/165019701750300663.
- 1202 85. Shone SM, Ryan S, Rigby PJ, Jutai JW. Toward a comprehensive evaluation of the  
1203 impact of electronic aids to daily living: evaluation of consumer satisfaction.  
1204 *Disabil Rehabil*. 2002; 24:115-125. doi: 10.1080/09638280110066794.
- 1205 86. Day H, Jutai J. Measuring the psychosocial impact of assistive devices: the PIADS.  
1206 *Canadian Journal of Rehabilitation*. 1996; 9(2):159-168.
- 1207 87. Bangor A, Kortum P, Miller JA. The System Usability Scale (SUS): An Empirical  
1208 Evaluation. *International Journal of Human-Computer Interaction*. 2008; 24(6):574-  
1209 594. doi: 10.1080/10447310802205776.
- 1210 88. Little R. Electronic aids for daily living. *Phys Med Rehabil Clin N Am*. 2010;  
1211 21:33-42. doi: 10.1016/j.pmr.2009.07.008.
- 1212 89. Boman I-L, Tham K, Granqvist A, Bartfai A, Hemmingsson H. Using electronic  
1213 aids to daily living after acquired brain injury: A study of the learning process and  
1214 the usability. *Disability and Rehabilitation: Assistive Technology*. 2007; 2(1):23-  
1215 33. doi: 10.1080/17483100600856213.
- 1216 90. Boustany G, Itani AED, Youssef R, Chami O, Abu-Faraj ZO. Design and  
1217 development of a rehabilitative eye-tracking based home automation system. In:  
1218 *Proceedings of 2016 3rd Middle East Conference on Biomedical Engineering*  
1219 (MECBME); 6-7<sup>th</sup> October 2016; Beirut (Lebanon). Institute of Electrical and

- 1220 Electronics Engineers (IEEE): Curran Associates, Inc.; Jan 2017. 30-33. doi:  
1221 10.1109/MECBME.2016.7745401.
- 1222 91. Brennan CP, McCullagh PJ, Galway L, Lightbody G. Promoting autonomy in a  
1223 smart home environment with a smarter interface. In: Proceedings of 2015 37th  
1224 Annual International Conference of the IEEE Engineering in Medicine and Biology  
1225 Society (EMBC); August 25-29 2015; MiCo – Milano Conference Center, Milan  
1226 (Italy). Institute of Electrical and Electronics Engineers (IEEE): Curran Associates,  
1227 Inc.; Dec 2015. 5032-5035. doi: 10.1109/EMBC.2015.7319522.
- 1228 92. Hooper B, Verdonck M, Amsters D, Myburg M, Allan E. Smart-device  
1229 environmental control systems: experiences of people with cervical spinal cord  
1230 injuries. *Disability and Rehabilitation: Assistive Technology*. 2018; 13(8):24-730.  
1231 doi: 10.1080/17483107.2017.1369591.
- 1232 93. Verdonck MC, Chard G, Nolan M. Electronic aids to daily living: be able to do  
1233 what you want. *Disability and Rehabilitation: Assistive Technology*. 2010;  
1234 6(3):268-281. doi:10.3109/17483107.2010.525291.
- 1235 94. Judge S, Robertson Z, Hawley MS. Users' Perceptions of Environmental Control  
1236 Systems. In: Emiliani PL, Burzagli L, Como A, Gabbanini F, Salminen A-L (eds.).  
1237 *Assistive Technology from Adapted Equipment to Inclusive Environments -*  
1238 *AAATE 2009*; August 31st–September 2nd 2009; Florence (Italy). Amsterdam:  
1239 IOS Press; 2009. 426-431.
- 1240 95. Harmer J, Bakheit AMO. The benefits of environmental control systems as  
1241 perceived by disabled users and their carers. *British Journal of Occupational*  
1242 *Therapy*. 1999; 62(9):394-398. doi: 10.1177/030802269906200902.

- 1243 96. Palmer P, Seale J. Exploring the attitudes to environmental control systems of  
1244 people with physical disabilities: a grounded theory approach. *Technol Disabil.*  
1245 2007; 9(1):17-27. doi: 10.3233/TAD-2007-19103.
- 1246 97. Costa CR, Ferreira FMRM, Bortolus MV, Carvalho MGR. Dispositivos de  
1247 tecnologia assistiva: fatores relacionados ao abandono. *Cad. Ter. Ocup. UFSCar.*  
1248 2015; 23(3):611-624. doi: 10.4322/0104-4931.ctoAR0544.7.8.
- 1249 98. Verza R, Carvalho ML, Battaglia MA, Uccelli MM. An interdisciplinary approach  
1250 to evaluating the need for assistive technology reduces equipment abandonment.  
1251 *Mult Scler.* 2006; 12(1):88-93. doi: 10.1191/1352458506ms1233oa.

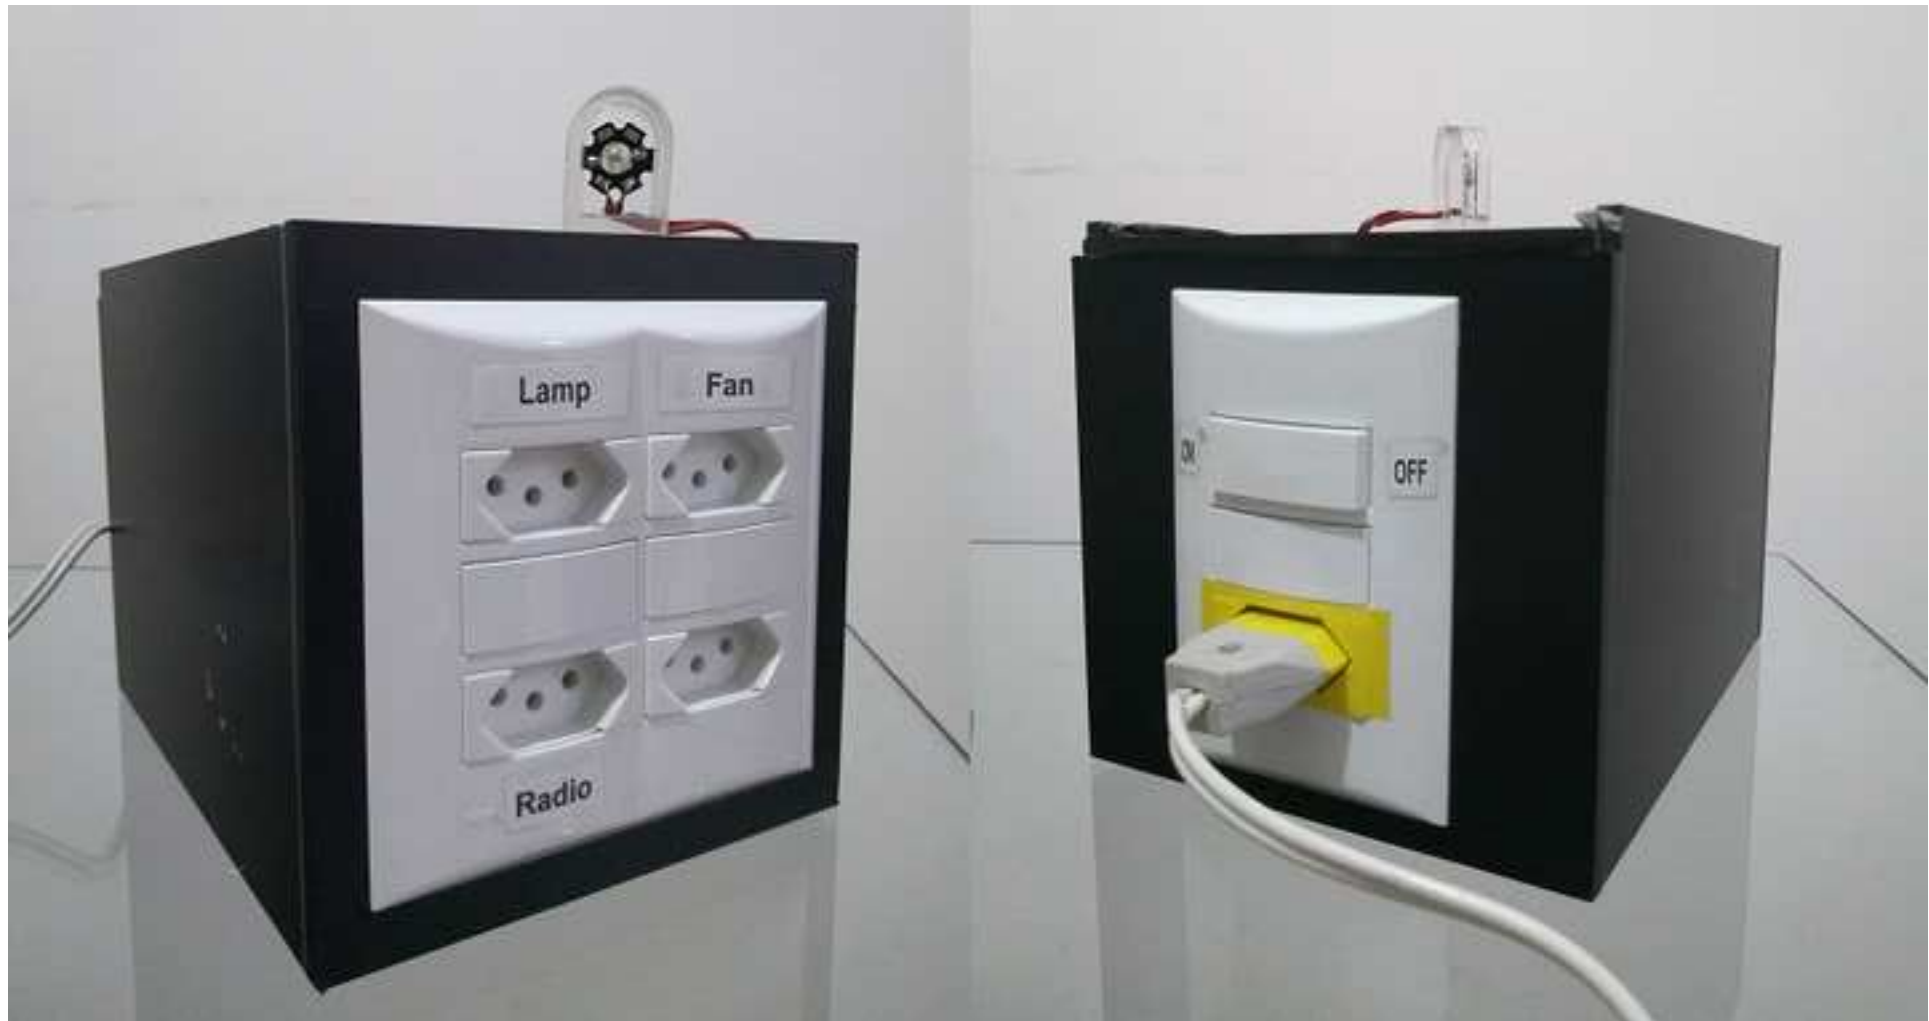

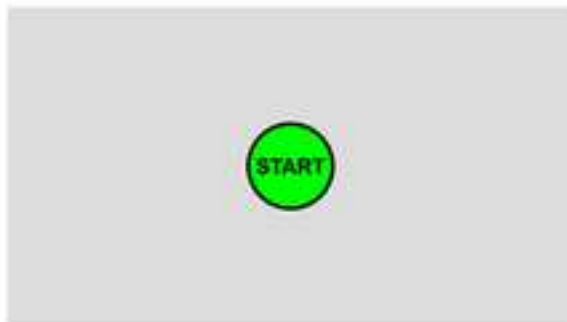

(a) Initial interface

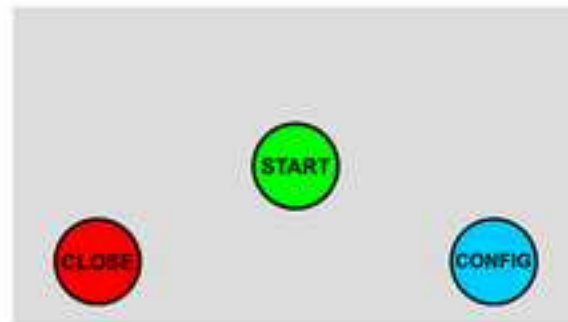

(b) Main menu

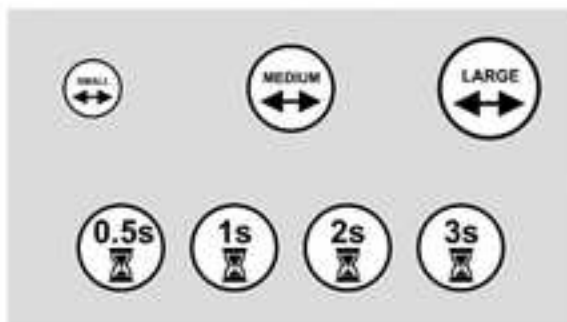

(c) Configuration menu

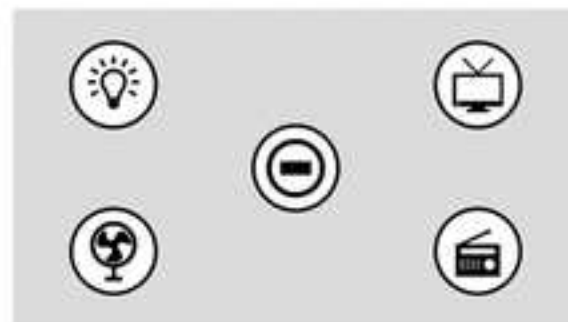

(d) Home devices control menu

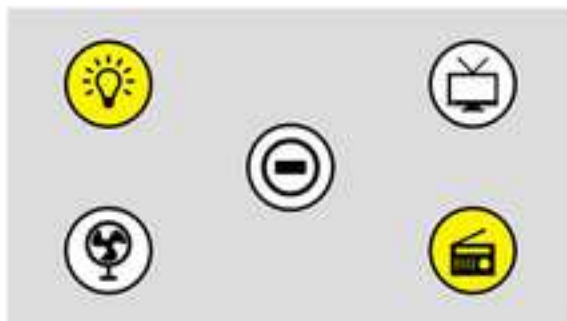

(e) Lamp and radio turned on

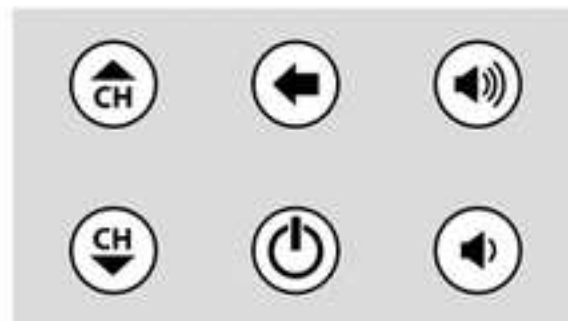

(f) TV submenu

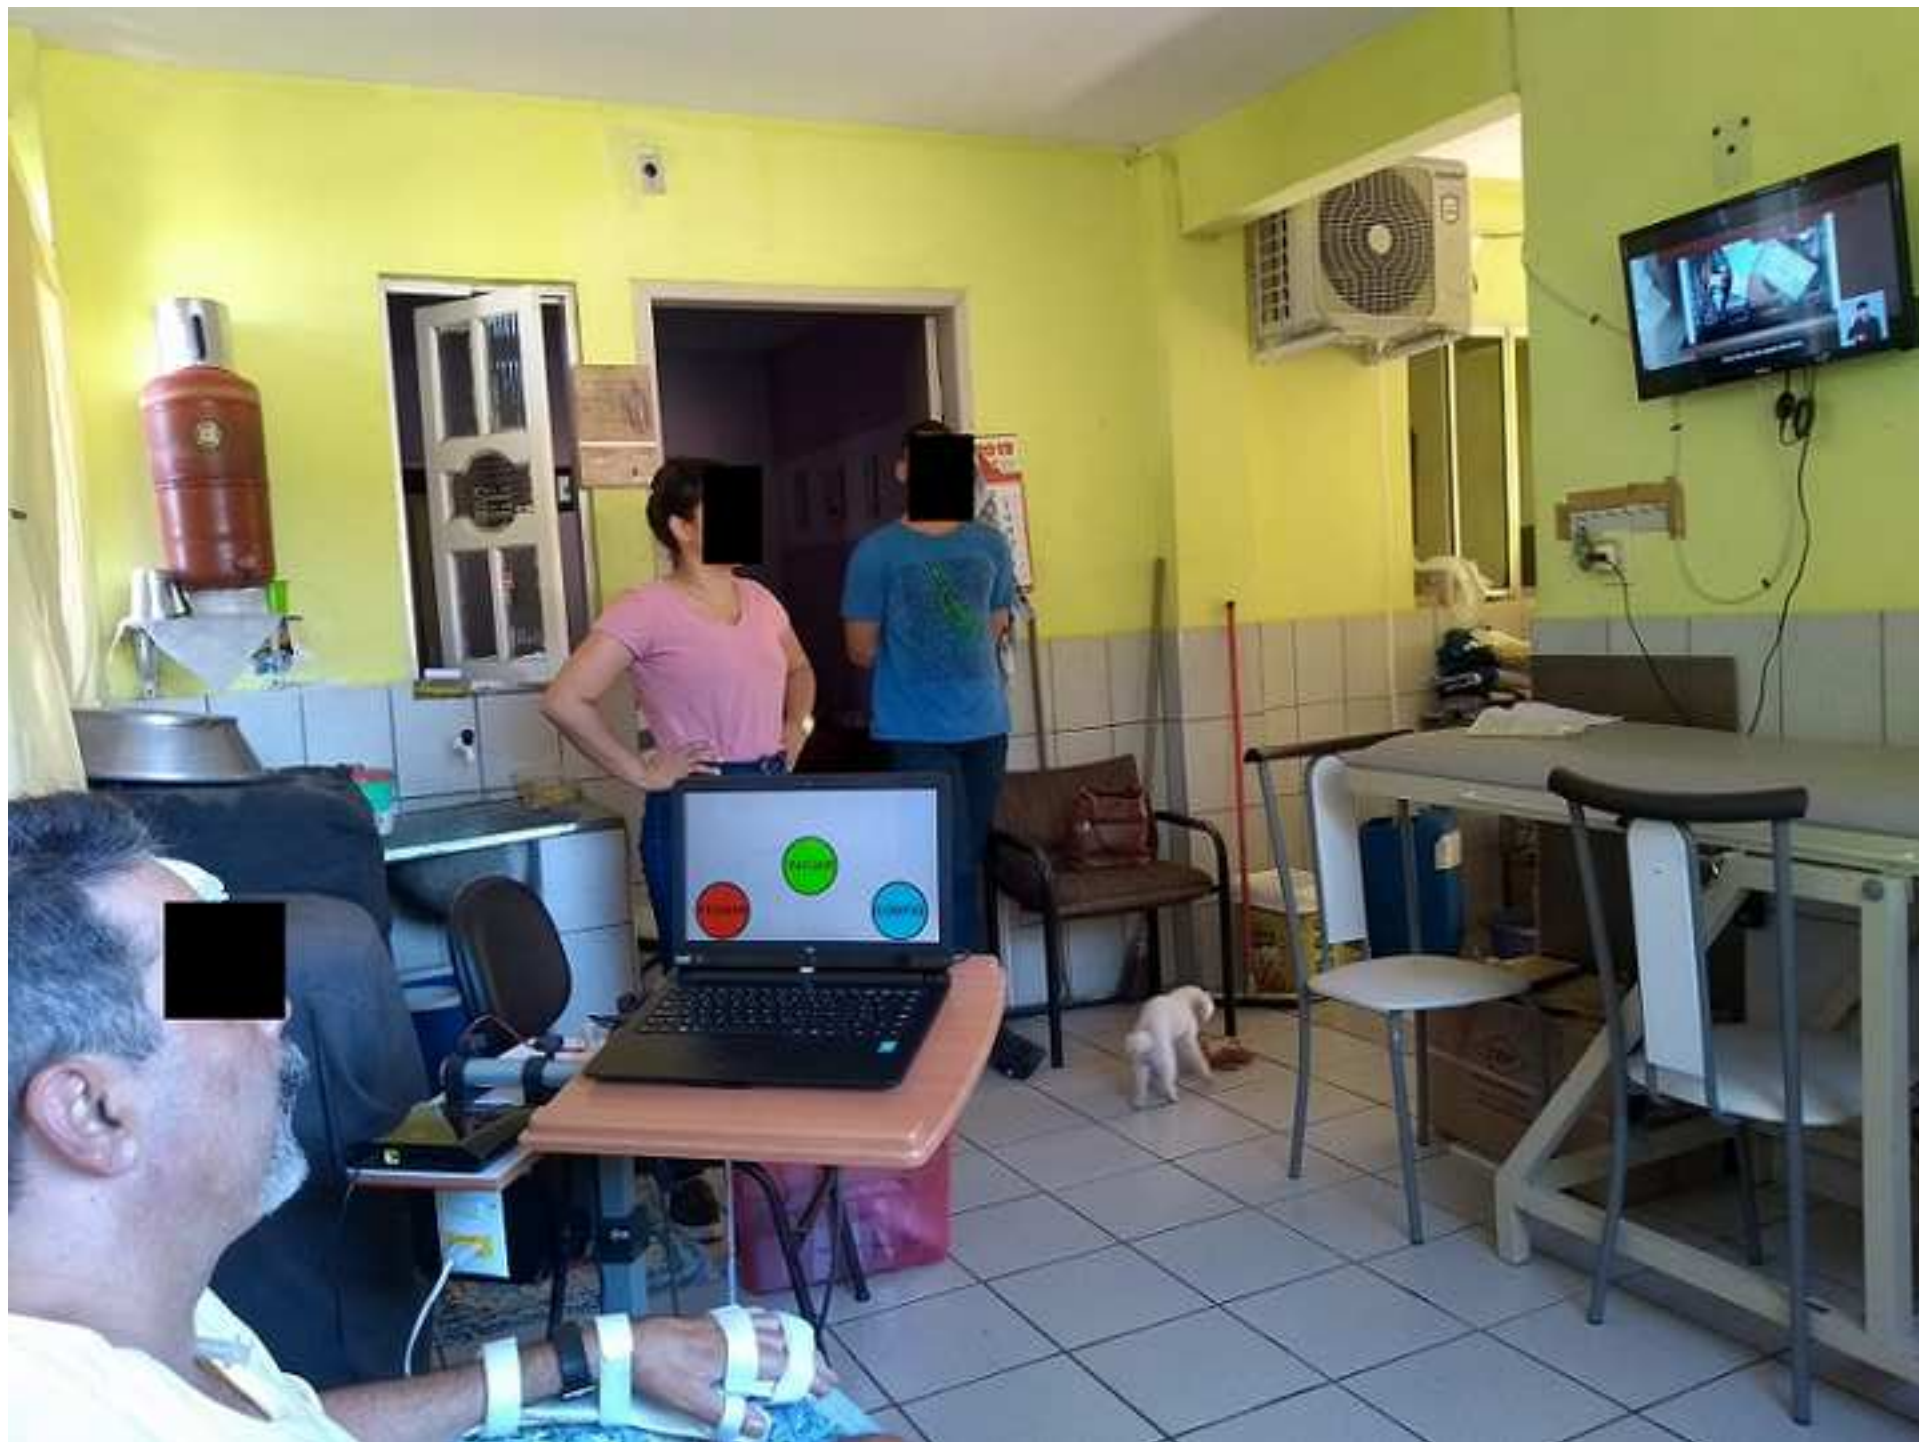

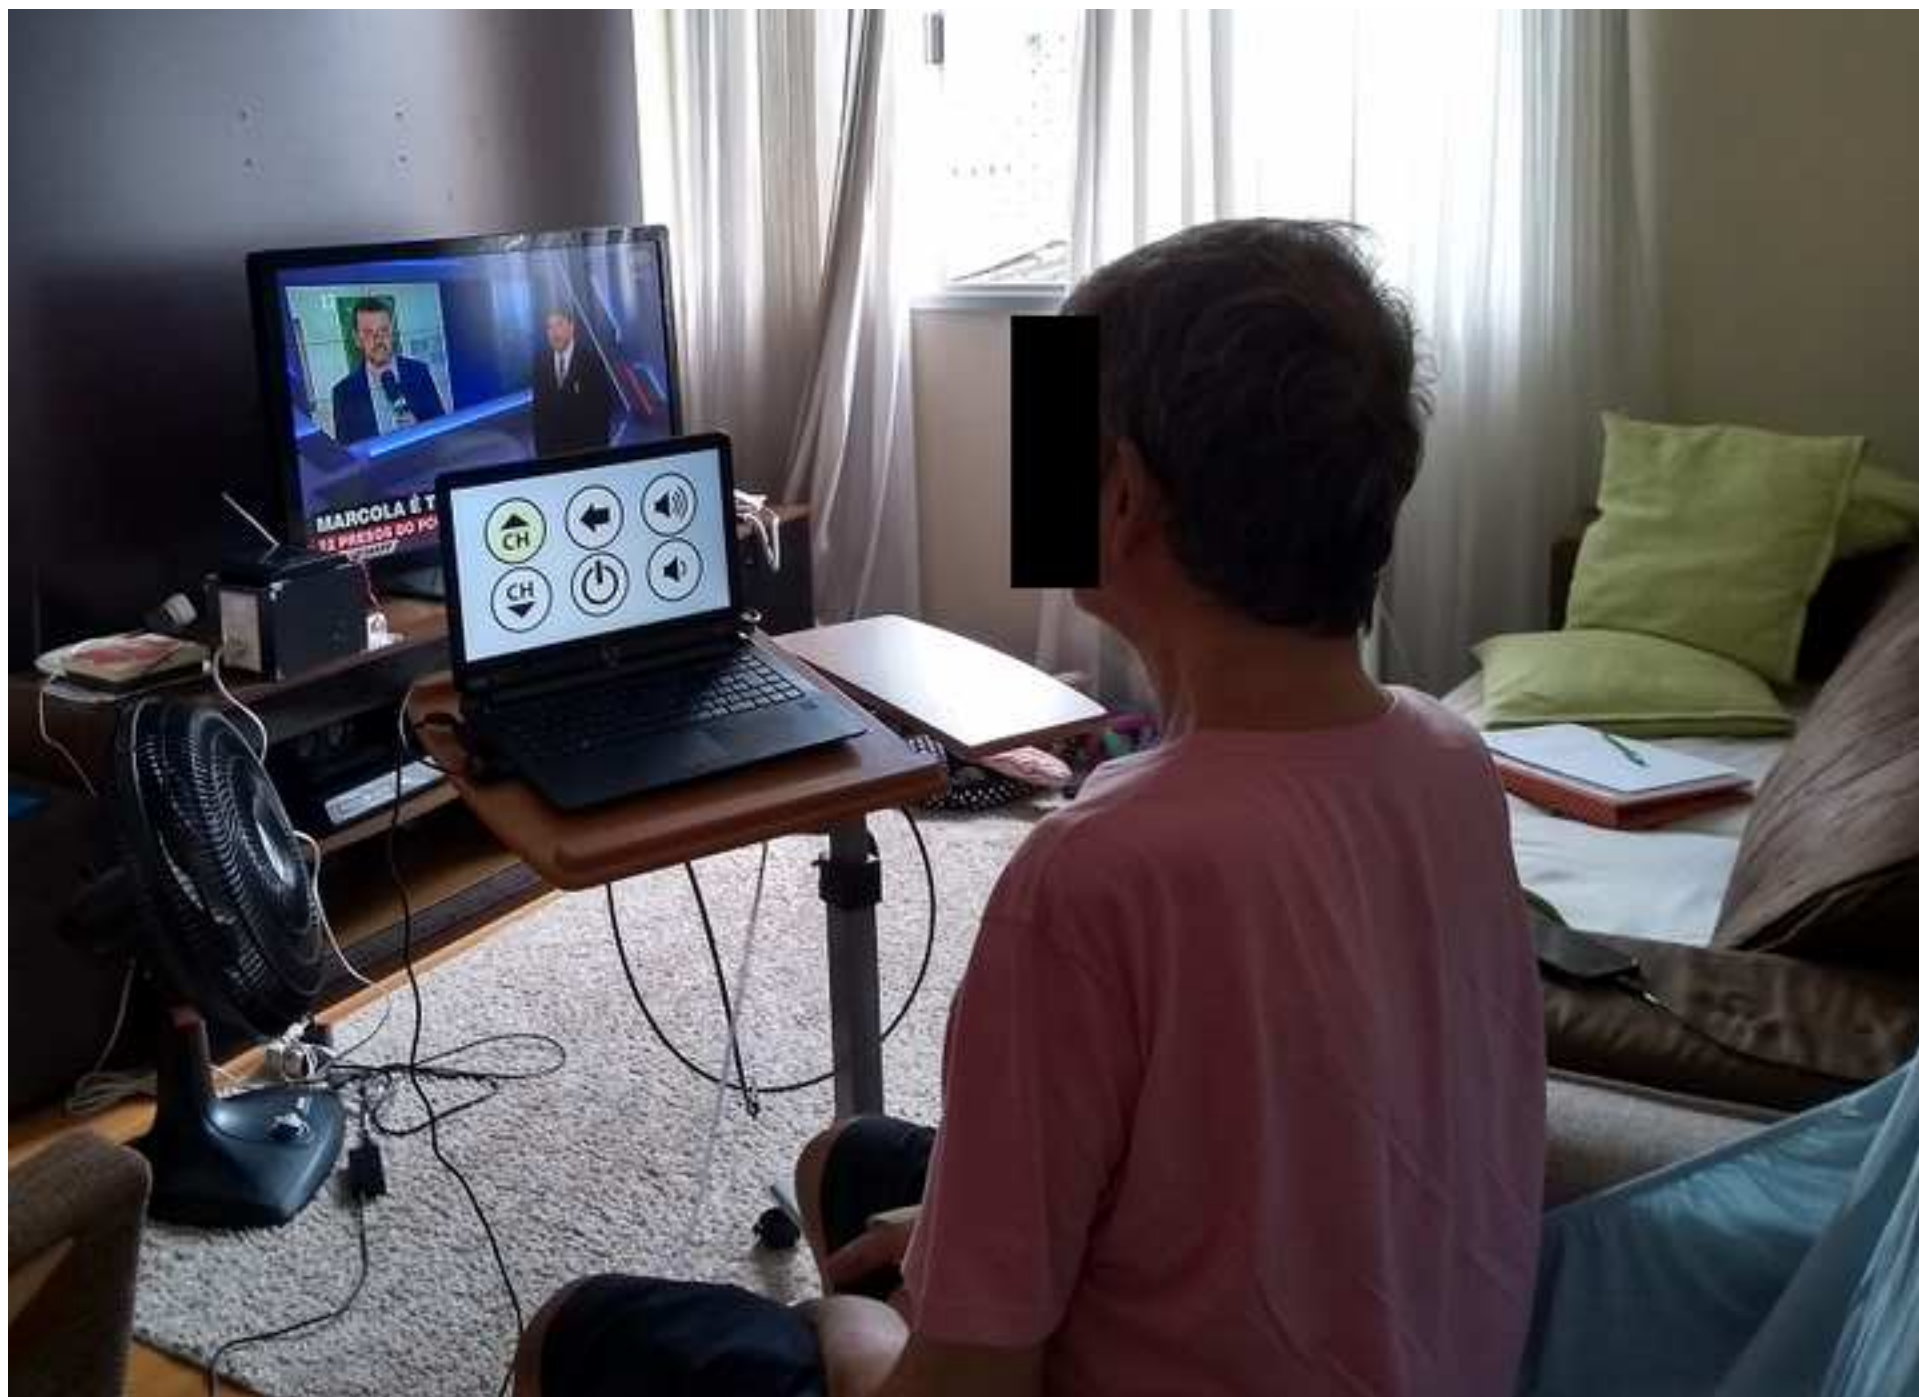

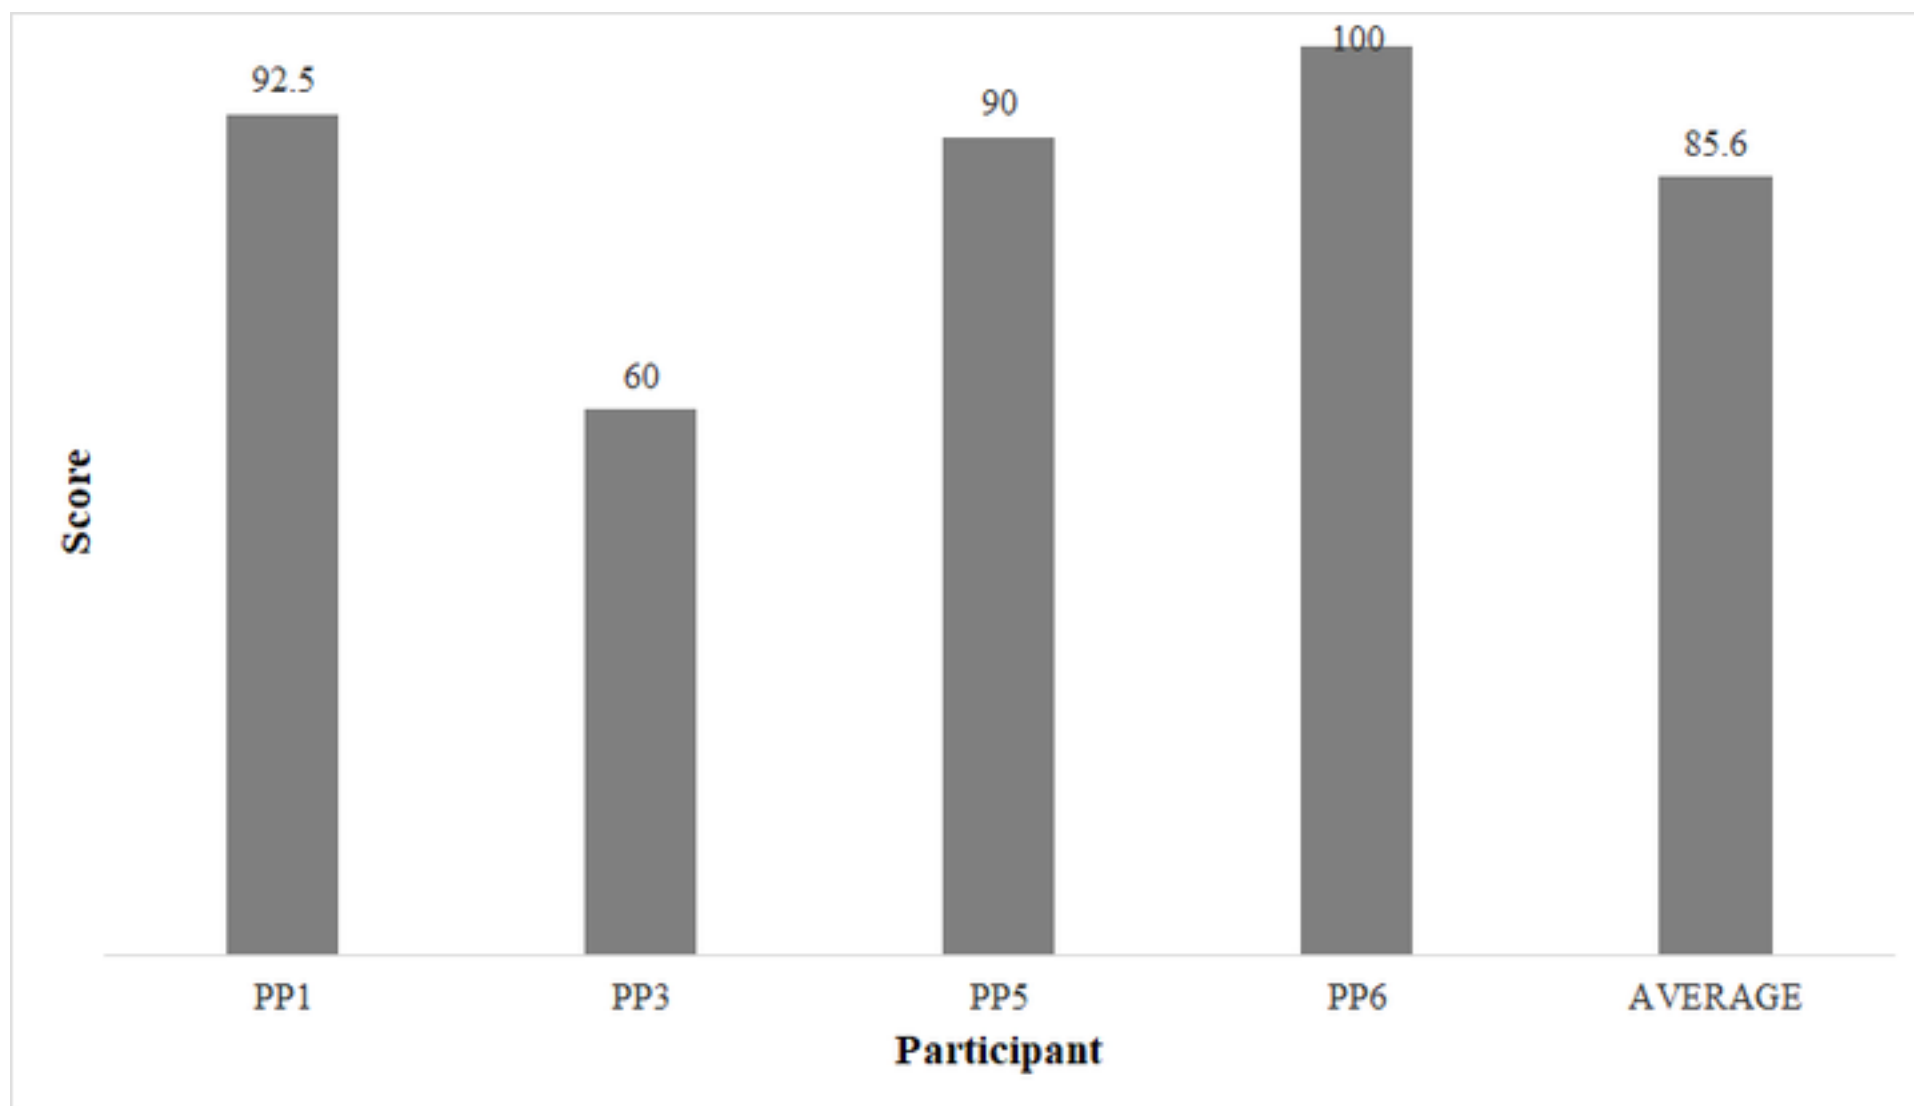

Supplement: pone.0256062.s002.pdf [file pone.0256062.s002.pdf]
