# Supplementary material for: Usability, occupational performance and satisfaction evaluation of a smart environment controlled by infrared oculography by people with severe motor disabilities
Source: PubMed Central journal article supplement (PMC8362986; doi:10.1371/journal.pone.0256062), 2021-08-13
Supplement: pone.0256062.s004.pdf [file pone.0256062.s004.pdf]

# PLOS ONE

## Usability, occupational performance and satisfaction evaluation of a smart environment controlled by infrared oculography by people with severe motor disabilities --Manuscript Draft--

|                               |                                                                                                                                                                                                                                                                                                                                                                                                                                                                                                                                                                                                                                                                                                                                                                                                                                                                                                                                                                                                                                                                                                                                                                                                                                                                                                                                                                                                                                                                                                                                                                                                                           |
|-------------------------------|---------------------------------------------------------------------------------------------------------------------------------------------------------------------------------------------------------------------------------------------------------------------------------------------------------------------------------------------------------------------------------------------------------------------------------------------------------------------------------------------------------------------------------------------------------------------------------------------------------------------------------------------------------------------------------------------------------------------------------------------------------------------------------------------------------------------------------------------------------------------------------------------------------------------------------------------------------------------------------------------------------------------------------------------------------------------------------------------------------------------------------------------------------------------------------------------------------------------------------------------------------------------------------------------------------------------------------------------------------------------------------------------------------------------------------------------------------------------------------------------------------------------------------------------------------------------------------------------------------------------------|
| <b>Manuscript Number:</b>     | PONE-D-20-12562R1                                                                                                                                                                                                                                                                                                                                                                                                                                                                                                                                                                                                                                                                                                                                                                                                                                                                                                                                                                                                                                                                                                                                                                                                                                                                                                                                                                                                                                                                                                                                                                                                         |
| <b>Article Type:</b>          | Research Article                                                                                                                                                                                                                                                                                                                                                                                                                                                                                                                                                                                                                                                                                                                                                                                                                                                                                                                                                                                                                                                                                                                                                                                                                                                                                                                                                                                                                                                                                                                                                                                                          |
| <b>Full Title:</b>            | Usability, occupational performance and satisfaction evaluation of a smart environment controlled by infrared oculography by people with severe motor disabilities                                                                                                                                                                                                                                                                                                                                                                                                                                                                                                                                                                                                                                                                                                                                                                                                                                                                                                                                                                                                                                                                                                                                                                                                                                                                                                                                                                                                                                                        |
| <b>Short Title:</b>           | Evaluation of a smart environment controlled by infrared oculography                                                                                                                                                                                                                                                                                                                                                                                                                                                                                                                                                                                                                                                                                                                                                                                                                                                                                                                                                                                                                                                                                                                                                                                                                                                                                                                                                                                                                                                                                                                                                      |
| <b>Corresponding Author:</b>  | Mariana Midori Sime, Ph.D.<br>Universidade Federal do Espirito Santo<br>Vitória, Espirito Santo BRAZIL                                                                                                                                                                                                                                                                                                                                                                                                                                                                                                                                                                                                                                                                                                                                                                                                                                                                                                                                                                                                                                                                                                                                                                                                                                                                                                                                                                                                                                                                                                                    |
| <b>Keywords:</b>              | smart environment; smart home; people with disabilities; Assistive technology; infrared oculography; effectiveness                                                                                                                                                                                                                                                                                                                                                                                                                                                                                                                                                                                                                                                                                                                                                                                                                                                                                                                                                                                                                                                                                                                                                                                                                                                                                                                                                                                                                                                                                                        |
| <b>Abstract:</b>              | <p>A smart environment is an assistive technology space that can enable people with motor disabilities to control their equipment (TV, radio, fan, etc.) through a human-machine interface activated by different inputs. However, assistive technology resources are not always considered useful, reaching quite high abandonment rate. This study aims to evaluate the effectiveness of a smart environment controlled through infrared oculography by people with severe motor disabilities. The study sample was composed of six individuals with motor disabilities. Initially, sociodemographic data forms, the Functional Independence Measure (FIM™), and the Canadian Occupational Performance Measure (COPM) were applied. The participants used the system in their domestic environment for a week. Afterwards, they were reevaluated with regards to occupational performance (COPM), satisfaction with the use of the assistive technology resource (QUEST 2.0), psychosocial impact (PIADS) and usability of the system (SUS), as well as through semi-structured interviews for suggestions or complaints. The most common demand from the participants of this research was 'control of the TV'. Two participants did not use the system. All participants who used the system (four) presented positive results in all assessment protocols, evidencing greater independence in the control of the smart environment equipment. In addition, they evaluated the system as useful and with good usability. Non-acceptance of disability and lack of social support may have influenced the results.</p> |
| <b>Order of Authors:</b>      | <p>Mariana Midori Sime, Ph.D.</p> <p>Alexandre Luís Cardoso Bissoli</p> <p>Daniel Lavino-Júnior</p> <p>Teodiano Freire Bastos-Filho</p>                                                                                                                                                                                                                                                                                                                                                                                                                                                                                                                                                                                                                                                                                                                                                                                                                                                                                                                                                                                                                                                                                                                                                                                                                                                                                                                                                                                                                                                                                   |
| <b>Response to Reviewers:</b> | <p>Response to Reviewers</p> <p>Title: Usability, occupational performance and satisfaction evaluation of a smart environment controlled by infrared oculography by people with severe motor disabilities</p> <p>In response to the reported pending issues, the following information is required:</p> <p>-Point 1: The paper needs to be substantially shortened and condensed.<br/>Answer to point 1: As recommended by the reviewer, the introduction and review have been combined and condensed. The description of the materials and instruments has been reduced. The results and discussion were separated and reorganized.</p> <p>-Point 2: Details and photos that might allow to identify the participants should be omitted.<br/>Answer to point 2: The vignettes with the details and photos of the participants have been removed and only the sociodemographic information that contributed to the discussion was maintained.</p>                                                                                                                                                                                                                                                                                                                                                                                                                                                                                                                                                                                                                                                                         |

-Point 3: About the funding received of the Google Inc.  
 Answer to point 3: Google Inc. only supported the research through Google's Latin America Research Awards to two authors, Teodiano Freire Bastos-Filho and Alexandre Luis Cardoso Bissoli, and this does not alter our adherence to Plos ONE policies on sharing data and materials. This statement can also be found in the cover letter, in the Competing Interests Statement section, as recommended

-Point 4: Please explain in more detail why "data cannot be shared publicly because of Ethics Committee terms".  
 Answer to point 4: Our data contained information that identified the participants. This information has been omitted and the data are being shared in the Supporting Information files.

- Point 5: Please amend the methods section and ethics statement of the manuscript to explicitly state that the patient/participant has provided consent for publication: "The individual in this manuscript has given written informed consent (as outlined in PLOS consent form) to publish these case details"  
 Answer to point 5: About the use of personal data, participants or their guardians signed the Free and Informed Consent Form (FICF), which guarantees that all personal data are confidential and private, even after the publication of the research. The data protection has been guaranteed by identifying participants by codes, instead of their names or initials, and by not including information such as date of birth and address. Detailed information about the participants health condition had already been excluded from the manuscript after the original decision letter. The terms with the highlighted subsection in both the original version in Portuguese and the translated version in English were included in the list of documents for submission. The current situation in Brazil, due to the COVID-19 pandemic is very serious, and it has been very difficult to meet the participants to obtain their signature on the PLOS specific consent form. Since they are people with disabilities and comorbidities, they have been in quarantine, as a measure to prevent spread of the Sars-CoV-2 virus. The methods section and ethics statement of the manuscript were amended to explicitly state that the participants has provided consent for publication, through the FICF.

Sincerely,  
 Mariana Midori Sime (e-mail: mariana.sime@ufes.br)  
 Vitória-ES (Brazil), May 01, 2021.

**Additional Information:**

| Question                                                                                                                                                                                                                                                                                                                                                                                                                                                                                            | Response                                                                                                                                                                                                                            |
|-----------------------------------------------------------------------------------------------------------------------------------------------------------------------------------------------------------------------------------------------------------------------------------------------------------------------------------------------------------------------------------------------------------------------------------------------------------------------------------------------------|-------------------------------------------------------------------------------------------------------------------------------------------------------------------------------------------------------------------------------------|
| <p><b>Financial Disclosure</b></p> <p>Enter a financial disclosure statement that describes the sources of funding for the work included in this submission. Review the <a href="#">submission guidelines</a> for detailed requirements. View published research articles from <a href="#">PLOS ONE</a> for specific examples.</p> <p>This statement is required for submission and <b>will appear in the published article</b> if the submission is accepted. Please make sure it is accurate.</p> | <p>AB and TBF received a award in Google Research Awards for Latin America, of Google Inc.</p> <p>The funders had no role in study design, data collection and analysis, decision to publish, or preparation of the manuscript.</p> |

### Unfunded studies

Enter: *The author(s) received no specific funding for this work.*

### Funded studies

Enter a statement with the following details:

- Initials of the authors who received each award
- Grant numbers awarded to each author
- The full name of each funder
- URL of each funder website
- Did the sponsors or funders play any role in the study design, data collection and analysis, decision to publish, or preparation of the manuscript?
- **NO** - Include this sentence at the end of your statement: *The funders had no role in study design, data collection and analysis, decision to publish, or preparation of the manuscript.*
- **YES** - Specify the role(s) played.

\* typeset

### Competing Interests

Use the instructions below to enter a competing interest statement for this submission. On behalf of all authors, disclose any [competing interests](#) that could be perceived to bias this work—acknowledging all financial support and any other relevant financial or non-financial competing interests.

This statement **will appear in the published article** if the submission is accepted. Please make sure it is accurate. View published research articles from [PLOS ONE](#) for specific examples.

Google Inc. only supported the research through Google's Latin America Research Awards (<https://research.google/philosophy/>) to two authors, Teodiano Freire Bastos-Filho and Alexandre Luís Cardoso Bissoli, and this does not alter our adherence to Plos ONE policies on sharing data and materials.

**NO authors have competing interests**

Enter: *The authors have declared that no competing interests exist.*

**Authors with competing interests**

Enter competing interest details beginning with this statement:

*I have read the journal's policy and the authors of this manuscript have the following competing interests: [insert competing interests here]*

\* typeset

**Ethics Statement**

Enter an ethics statement for this submission. This statement is required if the study involved:

- Human participants
- Human specimens or tissue
- Vertebrate animals or cephalopods
- Vertebrate embryos or tissues
- Field research

Write "N/A" if the submission does not require an ethics statement.

General guidance is provided below. Consult the [submission guidelines](#) for detailed instructions. **Make sure that all information entered here is included in the Methods section of the manuscript.**

This study was approved by the Human Research Ethics Committee of Federal University of Espirito Santo (UFES), Brazil, under protocol no. 976.828, CAAE 39410614.6.0000.5060. All participants or their legal guardians signed and received a copy of the Free and Informed Consent Form (FICF), allowing the publication of their data collected in the research, as long as the confidentiality of personal information is guaranteed.

**Format for specific study types**

**Human Subject Research (involving human participants and/or tissue)**

- Give the name of the institutional review board or ethics committee that approved the study
- Include the approval number and/or a statement indicating approval of this research
- Indicate the form of consent obtained (written/oral) or the reason that consent was not obtained (e.g. the data were analyzed anonymously)

**Animal Research (involving vertebrate animals, embryos or tissues)**

- Provide the name of the Institutional Animal Care and Use Committee (IACUC) or other relevant ethics board that reviewed the study protocol, and indicate whether they approved this research or granted a formal waiver of ethical approval
- Include an approval number if one was obtained
- If the study involved *non-human primates*, add *additional details* about animal welfare and steps taken to ameliorate suffering
- If anesthesia, euthanasia, or any kind of animal sacrifice is part of the study, include briefly which substances and/or methods were applied

**Field Research**

Include the following details if this study involves the collection of plant, animal, or other materials from a natural setting:

- Field permit number
- Name of the institution or relevant body that granted permission

**Data Availability**

Authors are required to make all data underlying the findings described fully available, without restriction, and from the time of publication. PLOS allows rare exceptions to address legal and ethical concerns. See the [PLOS Data Policy](#) and [FAQ](#) for detailed information.

Yes - all data are fully available without restriction

A Data Availability Statement describing where the data can be found is required at submission. Your answers to this question constitute the Data Availability Statement and **will be published in the article**, if accepted.

**Important:** Stating 'data available on request from the author' is not sufficient. If your data are only available upon request, select 'No' for the first question and explain your exceptional situation in the text box.

Do the authors confirm that all data underlying the findings described in their manuscript are fully available without restriction?

**Describe where the data may be found in full sentences. If you are copying our sample text, replace any instances of XXX with the appropriate details.**

- If the data are **held or will be held in a public repository**, include URLs, accession numbers or DOIs. If this information will only be available after acceptance, indicate this by ticking the box below. For example: *All XXX files are available from the XXX database (accession number(s) XXX, XXX).*
- If the data are all contained **within the manuscript and/or Supporting Information files**, enter the following:  
*All relevant data are within the manuscript and its Supporting Information files.*
- If neither of these applies but you are able to provide **details of access elsewhere**, with or without limitations, please do so. For example:

*Data cannot be shared publicly because of [XXX]. Data are available from the XXX Institutional Data Access / Ethics Committee (contact via XXX) for researchers who meet the criteria for access to confidential data.*

*The data underlying the results presented in the study are available from (include the name of the third party*

All relevant data are within the manuscript and its Supporting Information files.

|                                                                                                                                                                                                                                         |                                                                                                                                     |
|-----------------------------------------------------------------------------------------------------------------------------------------------------------------------------------------------------------------------------------------|-------------------------------------------------------------------------------------------------------------------------------------|
| <p><i>and contact information or URL).</i></p> <ul style="list-style-type: none"><li>• This text is appropriate if the data are owned by a third party and authors do not have permission to share the data.</li></ul> <p>* typeset</p> |                                                                                                                                     |
| Additional data availability information:                                                                                                                                                                                               | Tick here if your circumstances are not covered by the questions above and you need the journal's help to make your data available. |

1 **Usability, occupational performance and satisfaction evaluation of a**  
2 **smart environment controlled by infrared oculography by people with**  
3 **severe motor disabilities**

4  
5 Mariana Midori Sime<sup>1\*¶,#a</sup>, Alexandre Luís Cardoso Bissoli<sup>2&</sup>, Daniel Lavino-Júnior<sup>3&</sup>,  
6 Teodiano Freire Bastos-Filho<sup>4¶,#b</sup>

7  
8 <sup>1</sup> Occupational Therapy Department, Federal University of Espírito Santo (UFES),  
9 Vitória, Brazil

10 <sup>2</sup> Postgraduate Program in Electrical Engineering, Electrical Engineering Department,  
11 Federal University of Espírito Santo (UFES), Vitória, Brazil

12 <sup>3</sup> Electrical Engineering Department, Federal University of Espírito Santo (UFES),  
13 Vitória, Brazil

14 <sup>4</sup> Postgraduate Program in Electrical Engineering, Electrical Engineering Department  
15 and Postgraduate Program in Biotechnology, Federal University of Espírito Santo  
16 (UFES), Vitória, Brazil

17  
18 <sup>#a</sup> Current Address: Department of Occupational Therapy, Federal University of  
19 Espírito Santo – Campus Maruípe, Vitória, Brazil.

20 <sup>#b</sup> Current Address: Postgraduate Program in Electrical Engineering, Federal  
21 University of Espírito Santo – Campus Goiabeiras, Vitória, Brazil.

22  
23 \* Corresponding author

24 E-mail: [mariana.sime@ufes.br](mailto:mariana.sime@ufes.br) (MMS)

25  
26 ¶ These authors contributed equally to this work.

27 & These authors also contributed equally to this work.

28

29

30

31



## 32 **Abstract**

33 A smart environment is an assistive technology space that can enable people with  
34 motor disabilities to control their equipment (TV, radio, fan, etc.) through a human-  
35 machine interface activated by different inputs. However, assistive technology  
36 resources are not always considered useful, reaching quite high abandonment rate. This  
37 study aims to evaluate the effectiveness of a smart environment controlled through  
38 infrared oculography by people with severe motor disabilities. The study sample was  
39 composed of six individuals with motor disabilities. Initially, sociodemographic data  
40 forms, the Functional Independence Measure (FIM<sup>TM</sup>), and the Canadian Occupational  
41 Performance Measure (COPM) were applied. The participants used the system in their  
42 domestic environment for a week. Afterwards, they were reevaluated with regards to  
43 occupational performance (COPM), satisfaction with the use of the assistive  
44 technology resource (QUEST 2.0), psychosocial impact (PIADS) and usability of the  
45 system (SUS), as well as through semi-structured interviews for suggestions or  
46 complaints. The most common demand from the participants of this research was  
47 ‘control of the TV’. Two participants did not use the system. All participants who used  
48 the system (four) presented positive results in all assessment protocols, evidencing  
49 greater independence in the control of the smart environment equipment. In addition,  
50 they evaluated the system as useful and with good usability. Non-acceptance of  
51 disability and lack of social support may have influenced the results.

52  
53 **Keywords:** smart environment; smart home; people with disabilities; assistive  
54 technology; infrared oculography; effectiveness

55

56

## 57 **Introduction**

58 Assistive technology (AT) can be defined as an area of knowledge that includes  
59 products, resources, methodologies, strategies and services [1], or items, products and  
60 equipment acquired, adapted or modified [2], always with the aim of improving the  
61 functional performance, independence, and quality of life (QoL) of people with  
62 disabilities [1,2].

63 The literature indicates that individuals with diseases or injuries that affect the  
64 central nervous system, such as Multiple Sclerosis, Amyotrophic Lateral Sclerosis,  
65 Stroke, and Cranioencephalic or Spinal Cord Injury, can present sensory, motor,  
66 language and behavioral impairments at different levels, which lead to deficits in their  
67 occupational performance for carrying out Activities of Daily Living (ADL)  
68 independently, or interacting with people and objects [3–11], making them quite  
69 dependent on family members and/or caregivers [12].

70 According to the International Classification of Functioning, Disability and Health  
71 (ICF), people's impairments are configured as their environments/contexts limit their  
72 activities and restrict their social participation, not favoring their functionality [13–15].

73 The elements that constitute the ICF's model are Health Condition, Body Functions  
74 and Structures, and Activity, Participation, and Contextual Factors (Environmental and  
75 Personal), with AT devices and resources included in Environmental Factors [13–15],  
76 which improve the functionality of people with motor disabilities and/or older people, in  
77 different areas and health conditions [4,16–23].

78 However, although AT plays an important role in the recovery or improvement of  
79 the functionality of people with disabilities, the rates of abandonment and/or non-use of  
80 AT devices are high [25–28] for many reasons [19,23,24,28].

81        Conceptual models assist researchers and professionals with making better  
82 indications and implementation of AT devices. For instance, the Human Activity  
83 Assistive Technology (HAAT) model proposes to understand the role played by AT in  
84 the lives of people with disabilities. The HAAT model is based on four elements: the  
85 Human, the Activity, the Assistive Technology, and the Context in which the other  
86 three elements are inserted. It briefly describes “someone (human) doing something  
87 (activity) in a context using assistive technology” [29] (p.7).

88        Thus, during the process of preparing and/or indicating an AT resource or device, it  
89 is important to understand the activity that the person wants and needs to perform, the  
90 capacities they have, and the different aspects of the context that will influence their  
91 acquisition and use. Several studies have highlighted the importance of patient/user  
92 participation in the development of AT resources or devices [22,30–32], or in the  
93 process of defining and choosing the device that best suits their needs and of training  
94 and updating the team to evaluate and monitor the AT use [22,24,27,33].

95        Although there are several definitions of Smart Environment (SE) [34–36], it can  
96 be defined as a space (room, house, etc.) where services (temperature, lighting,  
97 entertainment, security, etc.) and/or equipment (lamps, home appliances, alarms, etc.)  
98 are managed intelligently using technology (personal computer, tablet, smartphone,  
99 remote control, etc.), through a Human-Machine Interface (HMI), aiming to assist users  
100 or residents with their ADL and provide them with better QoL [37,38].

101        Many studies have focused on the development of SEs that aim to provide greater  
102 independence for people with motor disabilities, combining their residual skills with the  
103 physical environment, since this group experiences several limitations in the use of  
104 environments and equipment control [37,39–45]. The secondary objective is to reduce  
105 their need for assistance from caregivers or family members [45].

106 Despite the gradual increase in the number of these studies, only few of them have  
107 addressed the benefits of SEs for people with disabilities regarding the exercise of  
108 autonomy, i.e., freedom of opinion, choice and decision [46], improvement of  
109 performance, and usability.

110 The reviews by Martin et al. [47] and Brandt et al. [48] found no evidence about the  
111 effectiveness of SEs for people with disabilities. Differences in sample size,  
112 interventions, and instruments used hinder comparison between these studies, but it was  
113 possible to notice a tendency to facilitate independence, instrumental ADL,  
114 socialization, and QoL.

115 Marikyan, Papagiannidis and Alamanos [49] consider that there is increased  
116 research addressing SEs; however, they are restricted to three themes: they ignore the  
117 multiple diversities of the concepts; focus on the functioning of technological devices,  
118 architecture and infrastructure; are little dedicated to the perspective of users.

119 For the control of electronic equipment in an SE by people with motor disabilities,  
120 different ways of capturing their inputs can be used. Among them, Infrared  
121 Oculography (IROG) is a technique that has been significantly studied in computer  
122 science [42,45,50–52].

123 In IROG, a device performs eye movement tracking, calculating the point on the  
124 computer screen the user is looking at. Eye tracking devices have a video camera  
125 equipped with high resolution infrared (IR) light-emitting diodes (LED) that reflect and  
126 increase the contrast between the pupil and the iris, allowing precise pupil location and  
127 facilitating the tracking of eye movement. This movement then functions as an HMI  
128 modality, enabling users to control several applications [53–55].

129 This technique has proved to be one of the most indicated and useful for people  
130 with severe motor disabilities, enabling them to use HMIs in an easier, comfortable and

131 intuitive way [56], without the need to place electrodes or equipment on their bodies.  
132 Another contributing factor is that eye movement is one of the few abilities maintained  
133 in people with severe motor disabilities [57].

134 Since the literature points to a lack of studies that address the effectiveness  
135 provided by AT [58,59] as well as the importance of good assessment using valid,  
136 reliable and viable instruments, and covering various resource aspects [60], it is  
137 important that further studies addressing the effectiveness of SEs in the everyday life of  
138 people with severe motor disabilities be conducted.

139 The SE system used in this study was developed at the Assistive Technology  
140 Center of the Federal University of Espirito Santo (UFES), Brazil. It consists of a smart  
141 global box (gBox) coupled to a computer software that enables the user to control the  
142 TV, radio, fan and/or lighting using eye-tracking technology [50].

143 In this sense, the main objective of this study was to evaluate the effectiveness of  
144 the developed SE controlled through IROG for specific use by people with severe motor  
145 disabilities.

146

## 147 **Materials and Methods**

148 This study was approved by the Human Research Ethics Committee of Federal  
149 University of Espirito Santo, Brazil, under protocol no. 976.828, CAAE  
150 39410614.6.0000.5060. All participants or their legal guardians signed and received a  
151 copy of the Free and Informed Consent Form, allowing the publication of their data  
152 collected in the research, as long as the confidentiality of personal information is  
153 guaranteed.

154

## 155 **Materials**

156 The following materials were used in this study:

157 1. Notebook computer with Intel® Core™ i3-5005U processor, Windows® 10 Home  
158 Edition operating system, 4GB RAM, 500 GB HD memory, and 14" LED screen. 2.  
159 Tobii Eye Tracker 4C [61], which allows: a) booting with the computer, b) controlling  
160 with only one or both eyes, c) making movements with the head, maintaining the  
161 calibration. 3. Gaze Point software [62]: to control the mouse cursor using Tobii Eye  
162 Tracker 4C. 4. Global Box (gBox) (Fig 1): an SE controller module [50] that receives  
163 commands from the computer, via Wi-Fi, to activate home devices. 5. SE Control  
164 Interface (CI) (Fig 2) [50]: configured in a Web application in which it is possible to  
165 download the use data history, among other options. 6. Wi-Fi Router: to send the signal  
166 from the notebook computer to the gBox. 7. Portable table: used to position the  
167 equipment (Fig 3), facilitating its transport and use.

168

169 **Fig 1. gBox: electronic module to control home devices in the SE.**

170

171 **Fig 2. User CI. Reproduced with permission from [50].**

172 After clicking on START (a), the main menu (b) appears on the screen and  
173 the user can go to the icon associated with the device they wish to control  
174 (START), configure the system (CONFIG) (c), or return to the initial screen  
175 (CLOSE). To activate the devices (d), the mouse cursor must be positioned on  
176 desired icon for the time defined in the settings, then its background turns yellow  
177 (e), except for the TV icon, which has an individual submenu (f) to turn it on/off or  
178 control its channels or volume.

179

180 **Fig 3. Portable table, eye tracker, and notebook computer are installed.**

181

## 182 **Data collection instruments**

183 The following instruments were used to collect information about the participants  
184 during HMI use:

185 Sociodemographic data forms: used to collect the participants' personal data,  
186 information on the diagnosis and history of the disease or injury, and experience with  
187 technology.

188 Functional Independence Measure (FIM<sup>TM</sup>) [63,64]: it assesses the degree of  
189 assistance needed for users to perform motor and cognitive ADL.

190 Canadian Occupational Performance Measure (COPM) [65]: it evaluates changes in  
191 the client's perception of their performance in activities and their satisfaction with them.

192 Psychosocial Impact of Assistive Devices Scale (PIADS) [66]: it assesses the  
193 effects of an AT device on the functional independence, well-being and QoL of users.

194 Quebec User Evaluation of Satisfaction with Assistive Technology (QUEST 2.0)  
195 [67,68]: it measures satisfaction with the AT resource and the service delivered.

196 System Usability Scale (SUS) [69]: it evaluates the usability of the environment  
197 control system.

198 Semi-structured interviews: they were audio recorded, carried out to obtain  
199 information about the process of using the system (positive and negative points, and  
200 suggestions).

201

## 202 **Participants**

203 Inclusion criteria: people aged  $\geq 18$  years with motor disabilities that compromised  
204 the normal interaction with equipment in the home environment, indicated by

205 rehabilitation institutions or professionals; they should also have a caregiver of age and  
206 literate. Exclusion criteria: individuals with cognitive deficits (related by their assisting  
207 professionals) that compromised understanding of the equipment functioning and use, as  
208 well as of the assessment instruments, and with visual deficits not corrected by glasses or  
209 contact lenses.

210

## 211 **Procedures**

212 A visit to each of the participant's homes was scheduled for the initial assessment  
213 and installation of the system. After acceptance, each participant or caregiver signed a  
214 FICF, responded to the sociodemographic data form and the FIM<sup>TM</sup> and COPM measures,  
215 the last directed to activities that require the use of equipment.

216 The system was installed in the residence room most used during the day as indicated  
217 by the participant or caregiver (Figure 4).

218

219 **Fig 4. System installed in the home of one of the study participants.**

220

221 Both the participant and the caregiver were trained to use the system and received a  
222 copy of the user manual containing explanations on the eye tracker calibration and  
223 equipment control. The caregiver's role was to turn on the notebook computer, position  
224 the portable table, and calibrate the eye tracker whenever necessary.

225 The system remained installed at each participants' homes for one week, as in the  
226 study conducted by Calvo et al. [70]. When necessary, extra visits to the participants'  
227 homes were made in order to make adjustments or assist with use.

228 At the end of that period, reassessments were carried out using the COPM, the other  
229 instruments (QUEST 2.0, PIADS, and SUS), and the semi-structured interview.



230 It is worth mentioning that a pilot study was previously carried out with a participant  
 231 with motor disabilities aiming to verify the system functionality in a common home  
 232 environment, and whether the methodology was adequate to the study objectives.

233 The pre- and post-test statistical analyses of the COPM instrument were performed  
 234 using the Paired Sample *t*-Test considering a statistically significant difference of 5%  
 235 ( $p < 0.05$ ). This statistical test was chosen because of its robustness, considering the low  
 236 sampling power obtained with small samples. Results of the other instruments are  
 237 presented descriptively.

238

## 239 Results

240 Six people with disabilities participated in this study. Of these, two individuals did  
 241 not use the system during the period that the equipment remained in their homes, and  
 242 their cases will be presented and discussed separately.

243 Table 1 shows the main information about the participants who used the system.

244

245 **Table 1. Data of participants who used the system**

| Participant | Gender         | Type of caregiver                        | Health condition                       | Time elapsed since diagnosis |
|-------------|----------------|------------------------------------------|----------------------------------------|------------------------------|
| PP1         | F <sup>a</sup> | Informal caregiver <sup>c</sup>          | ALS <sup>e</sup> + Psoriatic Arthritis | 5 months                     |
| PP3         | F              | Informal + formal caregiver <sup>d</sup> | Autoimmune vasculitis                  | 8 years                      |
| PP5         | M <sup>b</sup> | Informal caregiver                       | SCI <sup>f</sup> (incomplete C7 level) | 29 years                     |
| PP6         | M              | Informal caregivers                      | ALS                                    | 1 year and 9 months          |

246 <sup>a</sup>F – Female; <sup>b</sup>M – Male; <sup>c</sup>Informal caregiver – refers to a family member who cares the person;

247 <sup>d</sup>Formal caregiver – refers to a professionals who are paid to care; <sup>e</sup>ALS – Amyotrophic Lateral  
 248 Sclerosis; <sup>f</sup>SCI – Spinal Cord Injury.

249

250 The mean age of participants was 49 years, ranging from 30 to 63 years. Participants  
 251 PP1, PP5, and PP6 presented basic knowledge of technologies, more focused on the use  
 252 of cell phones. Participant PP3, the youngest, had intermediate knowledge in using  
 253 computers and cell phones before presenting the disease signs and symptoms.

254 Table 2 presents the results on functional independence collected through the FIM™.

255

256 **Table 2. FIM™ results of participants who used the system**

| Participant | Motor FIM™ | Cognitive FIM™ | Total FIM™ |
|-------------|------------|----------------|------------|
| <b>PP1</b>  | 47/91      | 35/35          | 82/126     |
| <b>PP3</b>  | 25/91      | 23/35          | 48/126     |
| <b>PP5</b>  | 44/91      | 35/35          | 79/126     |
| <b>PP6</b>  | 67/91      | 35/35          | 102/126    |

257

258 As previously described, the FIM™ score considers the need for assistance in each  
 259 activity. The participants' lower motor scores refer to difficulties in performing ADLs as  
 260 well as in holding and manipulating objects used daily. Participant PP3 presented a lower  
 261 cognitive score as a result of difficulty in communication.

262 In the COPM assessment, the participants were asked to indicate which activities  
 263 were important in their everyday lives. Having 'control of the TV' was considered  
 264 important by all participants, being able to 'turn the fan on/off' was deemed essential by  
 265 two participants (PP5 and PP6), and having 'control of the lights' was a significant  
 266 demand for only one of the participants (PP1).

267 At reassessment, participants PP1, PP5 and PP6 responded to the instruments with  
 268 the help of the researcher to make markings on paper, and the interview was answered  
 269 without help. With regard to participant PP3, the interview was conducted with her  
 270 mother and, for the other evaluations, the scales were designed in the notebook computer  
 271 and the participant indicate the alternative most appropriate moving the mouse cursor.  
 272 The COPM was fully answered by the participant. The SUS and QUEST 2.0 were

273 answered jointly with the participant's mother. Due to tiredness, her mother responded to  
 274 the PIADS based on what she believed her daughter's responses would be.

275 Results of the COPM and the Paired Sample *t*-Test for all participants are shown in  
 276 Table 3.

277

278 **Table 3. COPM and Paired Sample *t*-Test results of participants who used the**  
 279 **system**

| Participant              | Demands               | Performance     |                 | Satisfaction    |                 | Change                       |                              |
|--------------------------|-----------------------|-----------------|-----------------|-----------------|-----------------|------------------------------|------------------------------|
|                          |                       | P1 <sup>a</sup> | P2 <sup>b</sup> | S1 <sup>c</sup> | S2 <sup>d</sup> | P2<br>Total -<br>P1<br>Total | S2<br>Total -<br>S1<br>Total |
| PP1                      | Control of the TV     | 7               | 8               | 5               | 8               |                              |                              |
|                          | Control of the lights | 6               | 7               | 5               | 8               |                              |                              |
|                          | Total score           | 6.5             | 7.5             | 5               | 8               | 1                            | 3                            |
| PP3                      | Control of the TV     | 1               | 7               | 1               | 7               |                              |                              |
|                          | Total score           | 1               | 7               | 1               | 7               | 6                            | 6                            |
| PP5                      | Control of the TV     | 1               | 10              | 5               | 10              |                              |                              |
|                          | Turn the fan on/off   | 1               | 10              | 1               | 10              |                              |                              |
|                          | Total score           | 1               | 10              | 3               | 10              | 9                            | 7                            |
| PP6                      | Control of the TV     | 3               | 9               | 3               | 10              |                              |                              |
|                          | Turn the fan on/off   | 5               | 9               | 3               | 10              |                              |                              |
|                          | Total score           | 4               | 9               | 3               | 10              | 5                            | 7                            |
| <b><i>p</i>-value*</b>   |                       | Performance     |                 | Satisfaction    |                 |                              |                              |
| <b>Control of the TV</b> |                       | 0.045           |                 | 0.009           |                 |                              |                              |
| <b>COPM total score</b>  |                       | 0.050           |                 | 0.009           |                 |                              |                              |

280 <sup>a</sup> P1- initial performance; <sup>b</sup> P2- final performance; <sup>c</sup> S1- initial satisfaction; <sup>d</sup> S2- final  
 281 satisfaction. \* Paired Sample *t*-Test ( $p < 0.05$ ).  
 282

283 For the Paired Sample *t*-Test, only the events 'control of the TV' and 'COPM total  
 284 score' were analyzed, as these events were common to all participants.

285 Statistically significant results were observed for performance and satisfaction  
 286 regarding ‘control of the TV’ and for total satisfaction after using the system. Borderline  
 287 results were obtained with respect to total performance.

288 Table 4 shows the results obtained with application of the QUEST 2.0 instrument.  
 289 The results are very close or equal to 5.0 (the highest possible score), corresponding to  
 290 high levels of satisfaction.

291

292 **Table 4. QUEST 2.0 scores**

| <b>Participant</b> | <b>Resource</b> | <b>Service delivery</b> | <b>Total</b> |
|--------------------|-----------------|-------------------------|--------------|
| <b>PP1</b>         | 4.5             | 5.0                     | 4.7          |
| <b>PP3</b>         | 4.4             | 5.0                     | 4.6          |
| <b>PP5</b>         | 5.0             | 5.0                     | 5.0          |
| <b>PP6</b>         | 5.0             | 5.0                     | 5.0          |

293

294 Table 5 presents the items that the participants considered most important about the  
 295 SE control system. Each participant should indicate three items, and ‘effectiveness’ was  
 296 pointed by three of the four participants as an important feature of the SE tested.

297

298 **Table 5. Important items regarding the SE system**

| <b>Item</b>                  | <b>Number of citations</b> |
|------------------------------|----------------------------|
| <b>Effectiveness</b>         | 3                          |
| <b>Adjustment</b>            | 2                          |
| <b>Simplicity of use</b>     | 2                          |
| <b>Professional services</b> | 2                          |
| <b>Follow-up services</b>    | 1                          |
| <b>Comfort</b>               | 1                          |
| <b>Safety</b>                | 1                          |

299

300 As for the PIADS instrument, Table 6 presents the score for each subscale and the  
 301 final average of the participants, in which participants PP1, PP5, and PP6 were close to  
 302 the maximum score (3.0).

303

304 **Table 6. PIADS subscale scores**

| Participant | Competence | Adaptability | Self-esteem | Average |
|-------------|------------|--------------|-------------|---------|
| <b>PP1</b>  | 2.6        | 3.0          | 3.0         | 2.9     |
| <b>PP3</b>  | 1.3        | 0.7          | 1.8         | 1.3     |
| <b>PP5</b>  | 2.5        | 3.0          | 2.6         | 2.7     |
| <b>PP6</b>  | 2.8        | 3.0          | 2.3         | 2.7     |

305

306 Figure 5 illustrates the results of the SUS, whose average score was 85.6.

307

308 **Fig 5. SUS results of participants who used the system.**

309

310 Through the interviews, all participants who used the SE system found it useful,  
 311 mainly because it provided them with greater independence and exercise of autonomy in  
 312 controlling the equipment, as it can be verified in some of their answers:

313 *“Ah, it is useful in all aspects, right? Turn on, turn off”* (PP1)

314 *“I think it was good. I think (PP3) was happy to get it, right? You saw her expression  
 315 of joy, right? So, it was (useful). The part that I found most positive is giving autonomy,  
 316 right? This is fundamental!”* (PP3’s mother)

317 *“Its ... accessibility to be able to move. (...) it was very useful ... with the difficulty that  
 318 I have (...). The facility for you to pick up and do things”* (PP5)

319 *“It brings independence! Not depending on anybody to ‘turn up the volume!’, ‘Switch  
 320 channels!’, or ‘turn on the television!’, ‘turn off the television!’”* (PP6)

321

322 As examples of difficulties or aspects that need to be improved in our system, the  
 323 participants reported the delay to switch between distant TV channels; feeling tired or  
 324 having a mild headache caused by the use of the eye tracker; dependence on a caregiver

325 or family member to start the system and open the CIs; complicated process for  
326 calibrating the eye tracker.

327 The following suggestions were made: a numeric keyboard to type the desired  
328 channel; remove the need to use the notebook computer keyboard for some tasks, such as  
329 login to CI; make the system simpler and more intuitive for people with little experience  
330 with computers; allow the system to also control all the home lighting of the residence  
331 and make and receive phone calls via a smartphone.

332 Regarding the user manual, participants PP1, PP5 and PP6 reported that they did not  
333 need to access it, because the explanation and training provided by the researchers were  
334 sufficient to use the SE system. Participant PP3's mother, on the other hand, reported that  
335 the manual did not clarify her doubts, requiring the presence of one of the researchers.

336 The system usage records, obtained through the Web application, enabled  
337 verification of the number of days that each participant effectively used the SE (Table 7).  
338

339 **Table 7. Usage registration information obtained through the Web application**

| Participant | Number of days of use |
|-------------|-----------------------|
| PP1         | 2                     |
| PP3         | 5                     |
| PP5         | 2                     |
| PP6         | 4                     |

340

341 Table 8 shows the data of the participants who did not use the system.

342

343 **Table 8. Data of participants who did not use the system**

| Participant | Gender         | Type of caregiver                         | Health Condition            | Time elapsed since diagnosis |
|-------------|----------------|-------------------------------------------|-----------------------------|------------------------------|
| PP2         | F <sup>a</sup> | Formal caregivers <sup>c</sup>            | Multiple Sclerosis          | 4 years                      |
| PP4         | M <sup>b</sup> | Informal <sup>d</sup> + formal caregivers | SCI <sup>e</sup> (C5 level) | 2 years                      |

344 <sup>a</sup> F – Female; <sup>b</sup> M – Male; <sup>c</sup> Informal caregiver – refers to a family member who cares the  
 345 person; <sup>d</sup> Formal caregiver – refers to a professionals who are paid to care; <sup>e</sup> SCI – Spinal Cord  
 346 Injury.  
 347

348 At the initial assessment using the COPM, both PP2 and PP4 reported that watching  
 349 TV was a very important activity in their everyday lives, but that they were not satisfied  
 350 with the way they performed this activity. Thus, the TV was the only device connected to  
 351 the gBox for control.

352 Table 9 presents the results of the FIM<sup>TM</sup> with respect to functional independence.

353

354 **Table 9. FIM<sup>TM</sup> results of the participants who did not use the system**

| <b>Participant</b> | <b>Motor FIM<sup>TM</sup></b> | <b>Cognitive FIM<sup>TM</sup></b> | <b>Total FIM<sup>TM</sup></b> |
|--------------------|-------------------------------|-----------------------------------|-------------------------------|
| <b>PP2</b>         | 26/91                         | 35/35                             | 61/126                        |
| <b>PP4</b>         | 13/91                         | 35/35                             | 48/126                        |

355

356 According to the FIM<sup>TM</sup> data, both participants (PP2 and PP4) had need for  
 357 maximum assistance to perform motor activities and presented total independence for  
 358 cognitive activities.

359 At reassessment, these participants stated that they found the equipment useful,  
 360 responding positively to all the assessment instruments. However, the system data records  
 361 available at the Web application showed that they do not use the equipment at all.

362 Both participants present some similar characteristics that may have contributed to  
 363 not using the equipment: they have difficulty dealing with the diagnosis or with their  
 364 current health condition; caregivers not close or not engaged in this additional task; they  
 365 report that the equipment does not allow total independence and that they have little  
 366 knowledge of technology, limited to communication through the smartphone.

367

## 368 **Discussion**

369 This study was conducted with six participants. Despite its small sample size, this  
370 research aimed to analyze participants using the system in their homes, for a prolonged  
371 time, and not occasionally in the laboratory, because its main objectives were to assess  
372 occupational performance, usability, and satisfaction with the developed AT system.

373 All the participants who used the SE system need considerable assistance from their  
374 families or formal caregivers to perform their ADL, which was evidenced by the  
375 FIM<sup>TM</sup>. For them, ‘control the TV’ was the most important activity, according to the  
376 COPM.

377 The TV is an extremely popular appliance and an important resource of  
378 entertainment, mainly for people with disabilities. According to Myburg et al. [71], TV  
379 control systems were among the most frequent environment control devices in the  
380 population studied (people with SCI).

381 Although the system presents more options to control electronic devices, the  
382 participants did not use all of them, according to the COPM. Several researchers have  
383 reported the significance of considering factors that are important for the people who will  
384 use an AT device [22,24,32] aiming at better adherence and results.

385 Two participants (PP1 and PP6) wear glasses. Duchowski [54] points out that the use  
386 of lenses (contact lenses or glasses) can interfere with the eye tracker ability to locate the  
387 corneal reflex, as they have reflective surfaces; however, the use of glasses did not  
388 interfere with the performance in using the system in the present study.

389 In the COPM, the participants self-evaluated their performance (P) in the activities  
390 they considered important, and their satisfaction (S) with performance before and after  
391 using the system. The higher the score, the better the performance or satisfaction.

392 The final assessments (P2 or S2) of all participants who used the system were higher  
393 than their initial assessments (P1 or S1). Except for the change in performance of



394 participant PP1, all other evaluations showed changes greater than two points, which is  
395 considered by Law et al. [65] as a clinically important change.

396 Statistical analysis of the COPM showed positive results. For participants PP3, PP5  
397 and PP6, the initial evaluation scores indicate that they were unable to perform the  
398 activities or presented great difficulty in performing them, also reflecting on their low  
399 satisfaction. At the final assessment, the results clearly showed that the participants had a  
400 new way of interacting with the environment more actively and, consequently, greater  
401 satisfaction with performance.

402 Among all the participants, participant PP1 was the only one who still has some  
403 manual skills, thus she can operate the TV remote control, although with some difficulty,  
404 and getting tired along the process. Therefore, she presented higher initial scores and  
405 smaller changes at reevaluation.

406 Regarding the QUEST 2.0, to assess the satisfaction with the resource, the  
407 participants should consider the entire set of hardware (gBox, notebook computer, eye  
408 tracker, router, and portable table) and software (CI). Participants PP1 and PP3 scored  
409 less than 5.0, referring to difficulties in calibrating the eye tracker, occasional visual  
410 discomfort, and difficulty in using the system (in the case of the participant with the  
411 greatest motor impairment).

412 To assess the satisfaction with the service provided, the participants considered  
413 installation of the equipment, explanations, training, troubleshooting, and necessary  
414 follow-up during the week of use. In this item, all the scores were the highest (5.0). Good  
415 professionals and services are items appointed by Lenker et al. [22] as a positive point in  
416 the process of obtaining an AT resource, leading to better results with use. In contrast,  
417 lack of continuous support can lead participants to lose interest in its use [17].

418 The QUEST 2.0 total average (between 4.6 and 5.0) obtained in this research shows  
419 that the participants were satisfied with the SE. This result corroborates the findings of  
420 two studies of the systematic review conducted by Brandt et al. [48] on environmental  
421 control systems and smart homes used by people with disabilities.

422 The aspect that the participants considered most important in the SE control system  
423 was ‘effectiveness’. Demers et al. [72] defined this term as the “goal achievement with  
424 the AT device” (p.189), reinforcing that the system has met the needs of these people. Our  
425 findings corroborate those by Shone Stickel et al. [73], who also found effectiveness as  
426 the most important attribute of electronic AT devices for performance of ADL.

427 In the PIADS, respondents assessed how they were affected by the SE system.  
428 Participants PP1, PP5, and PP6 had the highest average values, indicating a maximum  
429 positive impact with the use of the SE. They assigned the highest values to the  
430 Adaptability subscale, indicating that with the use of the system they felt more willing to  
431 take risks and more motivated to participate socially [66]. Participant PP3, who has the  
432 most significant motor impairment, presented the lowest average among the participants.  
433 This instrument, as previously mentioned, was answered by her mother based on what she  
434 believed her daughter’s assessment would be. Thus, it may not reliably represent the  
435 participant's assessment.

436 The developers of this instrument [66] claim that these three subscales (Competence,  
437 Adaptability, and Self-esteem) are sufficiently sensitive to assess the psychosocial impact  
438 of an AT device or resource on the user, which are included in the QoL concept. In  
439 addition, the longer the period of use, the greater the feeling of competence [74], being  
440 that the hypotheses for it are that the longer the usage time: 1) the more the users  
441 appreciate the effect; 2) reflects the user's real need for the device.

442 Due to the short time of use of the SEs in this study (one week), it is not possible to  
443 state that there was a real change in the psychosocial aspects of the participants, but it  
444 indicates a tendency toward this change, in view of the results.

445 Regarding the SUS instrument, the result (85.6) indicates that the usability of our  
446 system was well evaluated. According to Bangor, Kortum and Miller [75], products  
447 evaluated in the range of 80 points are considered good, and products evaluated in the  
448 range of 90 points are considered exceptional.

449 The lowest evaluation refers, again, to participant PP3, whose answers pointed to  
450 some degree of complexity in the system and the need of a technical person or prior  
451 learning. Beyond the motor impairment of this participant, other factors may have  
452 interfered with the use of the eye tracker, such as her position in bed, small opening of the  
453 eye sometimes, tiredness with use, and difficulty of caregivers with the use of computers  
454 and programs.

455 Despite the lower ratings assigned by this participant, it seems that for all  
456 participants, on average, the assessment instruments showed positive results in relation to  
457 occupational performance, satisfaction with performance, satisfaction with the SE system,  
458 and usability of the system.

459 Many studies have evaluated improvements in these aspects after people with  
460 disabilities used environment control systems or electronic AT devices [17,44,73,76,77],  
461 whereas other studies have assessed ways of interacting with the environment through eye  
462 trackers [78,79]. However, no studies with the same objectives and using the same  
463 methodology of the present research, that is, use of IROG technology for SE control, have  
464 been found for comparison.

465 As the results show better occupational performance, satisfaction with performance  
466 and with the SE, and system usability, it can be concluded that the SE controlled by IROG

467 evaluated in this research provided people with motor disabilities with more independent  
468 operation and control of the equipment.

469 All the reports of participants point positive aspects with the use of the SE system.  
470 These statements corroborate the researched literature [80–83], since independence,  
471 control and privacy are highly important aspects pointed by people with disabilities who  
472 used environment control systems or electronic aids to daily living (EADL).

473 Participant PP6's speech also points to an outcome present in the study by  
474 Verdonck, Chard and Nolan's [81]: the embarrassment that people with disabilities  
475 present regarding their recurring requests for help, followed by apologies, as they feel  
476 uncomfortable to interrupt their caregivers' routine. According to those authors, the use  
477 of EADL changes this dynamic, with fewer apologies, less discomfort, and reduced  
478 caregiver burden.

479 The user manual was an additional material left with the participants to assist with the  
480 use of the SE system. The literature highlights how important explanations and training  
481 are for understanding the use and for adherence to the AT resource. Myburg et al. [71]  
482 found that training was considered crucial for the total integration of the environment  
483 control system in the lives of people with spinal cord injury, as well as the involvement of  
484 the occupational therapist in the testing, prescription and configuration of the system.

485 Information obtained through the Web application showed that the system was not  
486 used every day. The justifications given by the participants included trips, medical or  
487 rehabilitation consultations, and other leisure activities, such as going to church or taking  
488 short tours.

489 However, some other hypotheses were raised, corroborating the literature: the system  
490 has limitations, requiring other person to activate part of the equipment [82,84] or, when  
491 there is some voluntary movement, people prefer to behave as they are more accustomed

492 [85]. Another possibility is that the TV was controlled by a person who was in the same  
493 room as the participant, using the standard TV remote control.

494 About the participants who did not use the system, Costa et al. [85] found some  
495 factors that can contribute to the understanding: lack of equipment functionality (for not  
496 providing the desired independence), difficulty in use, embarrassment in using the device,  
497 lack of support from family members, lack of user motivation.

498 Regarding non-acceptance of diagnoses, studies have shown that this is an important  
499 factor to be considered when prescribing or selecting an AT device or resource [25,86];  
500 however, in the present study, this information only appeared at the reevaluation.

501 Wessels et al. [25] reported that there is a difference in the way the AT resource will  
502 be viewed between people who were born with a disability (for them, technology opens a  
503 new range of possibilities) and those who have acquired a disability (because, for them,  
504 technology will never replace the lost function).

505 Participants PP2 and PP4 are in the second group, since they acquired the disability  
506 as adults. A recurring line in the interviews is that they were very active and  
507 independent in the past, and now they are dependent for practically all activities. For  
508 them, the disability has also brought other types of losses, such as moving from their  
509 hometowns, changing their standard of living, ending relationships, or losing jobs. Such  
510 cases often result in periods of depression [25]. In this sense, for these people, it is  
511 hypothesized that they would only benefit from technology if their dependency could be  
512 completely reversed.

513 Another associated factor that may have contributed to non-use of the SE is that the  
514 AT device can highlight the disability [19,23,86]. Verza et al. [86] found that 30.3% of  
515 the reasons for abandoning or not using an AT device are due to the patient's non-  
516 acceptance. For those authors, although the AT device is seen as a possibility to increase

517 functionality, it can be interpreted as a validation of the disability and loss of  
518 independence, resulting in decreased self-esteem.

519 It should be noted that, although the system registers activation of the equipment, this  
520 information was not passed on to the participants, so that the use of the system was based  
521 on their real needs and desires, and not on the fact that they felt obliged to use it.

522 It is worth restating that it is important that the professional involved perform a wide  
523 and in-depth assessment of the patient's real demands, expectations, and possibilities of  
524 the proposed AT device, as well as consider their participation in the choice. These points  
525 are important to ensure acceptance and continuity of use, since abandonment can  
526 represent a waste of time and financial expenses (their own or from the government)  
527 [17,24,26,27].

528

## 529 **Conclusions**

530 Participants who used the IROG-controlled SE system showed better occupational  
531 performance and satisfaction with performance. In addition, the psychosocial impact  
532 was close to the maximum, satisfaction with the system was well evaluated and, for  
533 three participants, the usability was considered good. The participant who had a more  
534 pronounced motor impairment and, therefore, more difficulty in using the system, rated  
535 its psychosocial impact and usability with lower scores.

536 The two participants who did not use the system presented characteristics such as  
537 non-acceptance of their diagnoses or current health conditions, weak relationship with  
538 caregivers, and need for assistance with using the equipment. Besides that, the fact that  
539 an AT device possibly reinforces disability may have corroborated these results.

540 The HAAT model was used as a basis for definition of the study methodology  
541 aiming to achieve its objectives. Although the AT resource (SE system) was previously  
542 defined, in order to be evaluated, the choice of participants was not random, and  
543 professionals were asked to indicate the possible participants. Regarding the Activity  
544 component, the activities considered important for each participant were evaluated  
545 according to their wishes, even though other possibilities are available for control. Still  
546 in the Activity component, it was considered the most familiar place to conduct the  
547 research, that is, each of the participant's homes.

548 Regarding the Human component, the motor and cognitive skills of the participant  
549 were taken into account. The eye tracker using IROG technology was choose as the  
550 most suitable technique, because is less intrusive. Motivation to resume performance of  
551 the activities was assessed through the COPM contemplating the most significant.

552 With respect to the Context component, it was noticed that the participants who had  
553 greater social support (from family members and/or formal caregivers) actually used the  
554 SE and were able to provide a more in-depth assessment. Those who did not have this  
555 support, or had it in a weakened way, did not use the SE.

556 Finally, regarding the Assistive Technology component, it was evaluated that the  
557 SE system functioned as a facilitator to carry out the desired activities, enabling greater  
558 exercise of autonomy and independence.

559 Concerning the ICF, its components can also be broken down into the elements of  
560 this research. Health Condition considered the severe motor disability of the  
561 participants. In Body Functions and Structures, the movement limitations interfered in  
562 the way each of them interacted with the electronic equipment. Activities important for  
563 the participants and their Participation were assessed through the FIM<sup>TM</sup> and COPM  
564 instruments. Personal Factors were verified using the QUEST 2.0 and PIADS

565 instruments. Finally, about Environmental Factors, the SE system, as in the HAAT  
566 model, is considered a facilitator, and its usability was assessed through the SUS scale.

567       Considering that disability is indicated by the HAAT model and the ICF as inherent  
568 in social structures, and not in the person, the results found suggest that the SE system  
569 enabled reduction in the incapacity of the participants, who thus had greater  
570 participation in related activities.

571       This study provided a wide evaluation of equipment that aims to allow greater  
572 independence for people with severe motor disabilities, from the point of view of its  
573 operation and usability, as well as the benefits it provided to the people who used it.  
574 Several assessment instruments were used to achieve the study objectives.

575       For professionals, this study highlights the importance of a good evaluation for the  
576 prescription and development of AT resources, as well as new possibilities to provide  
577 people with severe motor disabilities with greater independence to carry out their  
578 everyday activities with regard to equipment control, avoiding abandonment or non-use.

579       Future studies with larger samples and longer duration should be conducted,  
580 expanding the possibilities of controlled equipment and devices, in order to understand  
581 whether the benefits remain in long term.

582

## 583 **Patents**

584       The gBox patent, together with the environment control system named “Remote  
585 micro-controlled device for charging residential loads via the Internet with emitter and  
586 receiver of commands via integrated infrared”, was submitted to the Institute of  
587 Technological Innovation – INIT at UFES, Brazil, and evaluation is under process.

588

## 589 **Acknowledgments**



590 The authors would like to thank all the professionals and participants involved in this  
591 study for their contribution.

592

## 593 **References**

- 594 1. Brasil. CORDE. Comitê de Ajudas Técnicas, ATA VII; 2008. Available from:  
595 <[http://www.mj.gov.br/sedh/ct/corde/dpdh/corde/comite\\_at.asp](http://www.mj.gov.br/sedh/ct/corde/dpdh/corde/comite_at.asp)>.
- 596 2. United States Congress. Assistive Technology Act of 2004: Amendment to the  
597 assistive technology act of 1998 (Public Law 108–364); 2004.
- 598 3. Siqueira SC, Vitorino PVO, Prudente COM, Santana TS, Melo GF. Quality of life  
599 of patients with Amyotrophic Lateral Sclerosis. *Rev Rene*. 2017; 18(1):139-146.  
600 doi: 10.15253/2175-6783.2017000100019.
- 601 4. Marrie RA, Cutter GR, Tyry T, Cofield SS, Fox R, Salter A. Upper limb  
602 impairment is associated with use of assistive devices and unemployment in  
603 multiple sclerosis. *Multiple Sclerosis and Related Disorders*. 2017; 13:87-92. doi:  
604 10.1016/j.msard.2017.02.013.
- 605 5. Shamshiri H, Fatehi F, Abolfazli R, Harirchian MH, Sedighi B, Zamani B, et al.  
606 Trends of quality of life changes in amyotrophic lateral sclerosis patients. *J Neurol*  
607 *Sci*. 2016; 368:35-40. doi: 10.1016/j.jns.2016.06.056.
- 608 6. Bertoni R, Lamers I, Chen CC, Feys P, Cattaneo D. Unilateral and bilateral upper  
609 limb dysfunction at body functions, activity and participation levels in people with  
610 multiple sclerosis. *Mult Scler*. 2015; 21(12):1566-1574. doi:  
611 10.1177/1352458514567553.
- 612 7. Souza FDA, Cruz DMC, Ferrigno ISV, Tsukimoto GR, Figliolia CS. Correlação  
613 entre papéis ocupacionais e independência de usuários com lesão medular em

- 614 processo de reabilitação. *Mundo da Saúde*. 2013; 37(2):166-175. doi:  
615 10.15343/0104-7809.2013372166175.
- 616 8. Riazi A, Bradshaw SA, Playford ED. Quality of life in the care home: a qualitative  
617 study of the perspectives of residents with multiple sclerosis. *Disabil Rehabil*. 2012;  
618 34(24):2095-2102. doi: 10.3109/09638288.2012.672539.
- 619 9. Lee YC, Chen YM, Hsueh IP, Wang YH, Hsieh CL. The impact of stroke: insights  
620 from patients in Taiwan. *Occup Ther Int*. 2010; 17(3):152-158. doi:  
621 10.1002/oti.301.
- 622 10. Wolf TJ, Baum C, Connor LT. Changing face of stroke: Implications for  
623 occupational therapy practice. *AJOT*. 2009; 63:621-625. doi:  
624 10.5014/ajot.63.5.621.
- 625 11. Pedretti LW, Early ME. Desempenho ocupacional e modelos de prática para  
626 disfunção física. In: Pedretti LW, Early ME. *Terapia ocupacional: capacidades*  
627 *práticas para disfunções físicas*. São Paulo: Roca; 2004.
- 628 12. Camacho A, Esteban J, Paradas C. Informe de la Fundación del Cerebro sobre el  
629 impacto social de la esclerosis lateral amiotrófica y las enfermedades  
630 neuromusculares. *Neurología*. 2015; 33:35-46. doi: 10.1016/j.nrl.2015.02.003.
- 631 13. World Health Organization – WHO. *International Classification of Functioning,*  
632 *Disability and Health: ICF*. World Health Organization; 2001.
- 633 14. Farias N, Buchalla CM. A Classificação Internacional de Funcionalidade,  
634 Incapacidade e Saúde da Organização Mundial da Saúde: conceitos, usos e  
635 perspectivas. *Rev Bras Epidemiol*. 2005; 8(2):187-193. doi: 10.1590/S1415-  
636 790X2005000200011.

- 637 15. Dahl TH. International classification of functioning, disability and health: an  
638 introduction and discussion of its potential impact on rehabilitation services and  
639 research. *J Rehabil Med.* 2002; 34:201-204. doi: 10.1080/165019702760279170.
- 640 16. Borg J, Lindström A, Larsson S. Assistive technology in developing countries:  
641 national and international responsibilities to implement the Convention on the  
642 Rights of Persons with Disabilities. Viewpoint. *Lancet.* 2009; 374(28):1863-1865.  
643 doi: 10.1016/S0140-6736(09)61872-9.
- 644 17. Jamwal R, Callaway L, Ackerl J, Farnworth L, Winkler D. Electronic assistive  
645 technology used by people with acquired brain injury in shared supported  
646 accommodation: Implications for occupational therapy. *British Journal of*  
647 *Occupational Therapy.* 2017; 80(2):89-98. doi: 10.1177/0308022616678634.
- 648 18. Cruz DMC, Ioshimoto MTA. Tecnologia assistiva para as atividades de vida diária  
649 na tetraplegia completa C6 pós-lesão medular. *Rev Triang: Ens. Pesq. Ext.*  
650 *Uberaba.* 2010; 3(2):177-190. doi: 10.18554/rt.v3i2.153.
- 651 19. Andrade VS, Pereira LSM. Influência da tecnologia assistiva no desempenho  
652 funcional e na qualidade de vida de idosos comunitários frágeis: uma revisão  
653 bibliográfica. *Rev Bras Geriatr Gerontol.* 2009; 12(1):113-122. doi: 10.1590/1809-  
654 9823.2009120110.
- 655 20. Plotkin A, Sela L, Weissbrod A, Kahana R, Haviv L, Yeshurun Y, et al. Sniffing  
656 enables communication and environmental control for the severely disabled. *PNAS.*  
657 2010; 107(32):14413-14418. doi: 10.1073/pnas.1006746107.
- 658 21. Lulé D, Zickler C, Häcker S, Bruno MA, Demertzi A, Pellas F, et al. Life can be  
659 worth living in locked-in syndrome. *Progress in Brain Research.* 2009; 177:339-  
660 351. doi: 10.1016/S0079-6123(09)17723-3.

- 661 22. Lenker JA, Harris F, Taugher M, Smith RO. Consumer perspectives on assistive  
662 technology outcomes. *Disabil Rehabil Assist Technol.* 2013; 8(5):373-380. doi:  
663 10.3109/17483107.2012.749429.
- 664 23. Squires LA, Williams N, Morrison VL. Matching and accepting assistive  
665 technology in multiple sclerosis: A focus group study with people with multiple  
666 sclerosis, carers and occupational therapists. *Journal of Health Psychology.* 2016;  
667 24:1-15. doi: 10.1177/1359105316677293.
- 668 24. Cruz DMC, Emmel MLG, Manzini MG, Mendes PVB. Assistive technology  
669 accessibility and abandonment: challenges for occupational therapists. *The Open*  
670 *Journal of Occupational Therapy.* 2016; 4(1):Article 10. doi: 10.15453/2168-  
671 6408.1166.
- 672 25. Wessels R, Dijcks B, Soede M, Gelderblom GJ, De Witte L. Non-use of provided  
673 assistive technology devices: a literature overview. *Technology and Disability.*  
674 2003; 15(4):231-238. doi: 10.3233/TAD-2003-15404.
- 675 26. Riemer-Reiss ML, Wacker RR. Factors associated with assistive technology  
676 discontinuance among individuals with disabilities. *Journal of Rehabilitation.* 2000;  
677 66(3):44-50.
- 678 27. Phillips B, Zhao H. Predictors of assistive technology abandonment. *Assistive*  
679 *Technology.* 1993; 5(1):36-45. doi: 10.1080/10400435.1993.10132205.
- 680 28. Alper S, Raharinirina S. Assistive technology for individuals with disabilities: a  
681 review and synthesis of the literature. *Journal of Special Education Technology.*  
682 2006; 21(2):47-64. doi: 10.1177/016264340602100204.
- 683 29. Cook A, Polgar J. *Assistive Technologies: Principles and Practice.* 4th ed. St.  
684 Louis: Mosby Elsevier; 2015.

- 685 30. Kinney A, Goodwin DM, Gitlow L. Measuring assistive technology outcomes: a  
686 user centered approach. *Assistive Technology Outcomes and Benefits*. 2016; 10:94-  
687 110.
- 688 31. Peterson DB, Murray GC. Ethics and assistive technology service provision.  
689 *Disabil Rehabil Assist Technol*. 2006; 1:59-67. doi: 10.1080/09638280500167241.
- 690 32. Rocha EF, Castiglioni MC. Reflexões sobre recursos tecnológicos: ajudas técnicas,  
691 tecnologia assistiva, tecnologia de assistência e tecnologia de apoio. *Rev Ter Ocup*  
692 *Univ São Paulo*. 2005; 16(3):97-104. doi: 10.11606/issn.2238-6149.v16i3p97-104.
- 693 33. Netten JJ, Dijkstra PU, Geertzen JHB, Postema K. What influences a patient's  
694 decision to use custom-made orthopaedic shoes? *BMC Musculoskeletal Disorders*.  
695 2012; 13:92. doi: 10.1186/1471-2474-13-92.
- 696 34. Rampinelli M, Bastos TF, Vassallo RF, Pizarro D. Implementation of an intelligent  
697 space for localizing and controlling a robotic wheelchair. In: 2012 ISSNIP  
698 Biosignals and Biorobotics Conference: Biosignals and Robotics for Better and  
699 Safer Living (BRC); 9-11th January 2012; Manaus-Brazil: IEEE – Institute of  
700 Electrical and Electronics Engineers; 2012. 1-4. doi: 10.1109/BRC.2012.6222187.
- 701 35. Lee JH, Hashimoto H. Intelligent Space: concept and contents. *Advanced Robotics*.  
702 2002; 16(3):265-280. doi: 10.1163/156855302760121936.
- 703 36. Aarts EH, Encarnação JL. Into Ambient Intelligence. In. Aarts EH, Encarnação JL,  
704 editors. *True visions: The emergence of ambient intelligence*. Springer:  
705 Netherlands; 2008. pp. 1-16.
- 706 37. Kadam R, Mahamuni P, Parikh Y. Smart Home System. *International Journal of*  
707 *Innovative Research in Advanced Engineering*. 2015; 2:81-86.
- 708 38. Rivera-illingworth F, Callaghan V, Hagaras H. A neural network agent based  
709 approach to activity detection in AmI environments. In: *Proceedings of IEEE*

- 710 International Workshop on Intelligent Environments; 28-29th June 2005;  
711 Colchester (United Kingdom). Institution of Engineering and Technology; 2005. 1-  
712 12. doi: 10.1049/ic:20050222.
- 713 39. Tello RJMG, Bissoli ALC, Ferrara F, Müller S, Ferreira A, Bastos-Filho TF.  
714 Development of a Human Machine Interface for Control of Robotic Wheelchair  
715 and Smart Environment. IFAC-PapersOnLine. 2015; 48:136-141. doi:  
716 10.1016/j.ifacol.2015.12.023.
- 717 40. Hussein A, Adda M, Atieh M, Fahs W. Smart Home Design for Disabled People  
718 based on Neural Networks. Procedia Computer Science. 2014; 37:117-126. doi:  
719 10.1016/j.procs.2014.08.020.
- 720 41. Rampinelli M, Covre VB, Queiroz FM, Vassallo RF, Bastos-Filho TF, Mazo M.  
721 An intelligent space for mobile robot localization using a multi-camera system.  
722 Sensors. 2014; 14:15039-15064. doi: 10.3390/s140815039.
- 723 42. Adami I, Antona M, Stephanidis C. Ambient Assisted Living for the Motor  
724 Impaired. In: Koroupetroglou G, editor. Assistive Technologies, Disability  
725 Informatics and Computer Access for Motor Limitations. USA: IGI Global; 2013,  
726 pp. 76-104.
- 727 43. Bastos Filho TF, Fernandes MR, Lucena-Jr VF, Pereira CE. Proposal of  
728 Architecture for Integration of a Wheelchair in an Intelligent Space. In: Proceedings  
729 of 4th IEEE Biosignals and Biorobotics Conference (ISSNIP); 18-20th February  
730 2013; Rio de Janeiro-RJ (Brazil); 2013. 6-11.
- 731 44. Ocepek J, Roberts AEK, Vidmar G. Evaluation of treatment in the smart home IRIS  
732 in terms of functional independence and occupational performance and satisfaction.  
733 Computational and Mathematical Methods in Medicine. 2013; 2013:10 pages. doi:  
734 10.1155/2013/926858.

- 735 45. Gentry T. Smart homes for people with neurological disability: State of the art.  
736 NeuroRehabilitation. 2009; 25:209-217. doi: 10.3233/NRE-2009-0517.
- 737 46. Muñoz D, Fortes P. O princípio da autonomia e o consentimento livre e esclarecido.  
738 In. Iniciação à Bioética. Costa SIF, Oselka G, Garrafa V, coordinators. Brasília:  
739 CFM; 1998. pp. 53-70.
- 740 47. Martin S, Kelly G, Kernohan WG, McCreight B, Nugent C. Smart home  
741 technologies for health and social support. Cochrane Database of Systematic  
742 Reviews. 2008; 4:1-10. doi: 10.1002/14651858.CD006412.pub2.
- 743 48. Brandt Å, Samuelsson K, Töytäri O, Salminen A-L. Activity and participation,  
744 quality of life and user satisfaction outcomes of environmental control systems and  
745 smart home technology: a systematic review. Disability and Rehabilitation:  
746 Assistive Technology. 2011; 6(3):189-206. doi: 10.3109/17483107.2010.532286.
- 747 49. Marikyan D, Papagiannidis S, Alamanos E. A systematic review of the smart home  
748 literature: A user perspective. Technological Forecasting & Social Change. 2019;  
749 138:139-154. doi: 10.1016/j.techfore.2018.08.015.
- 750 50. Bissoli A, Lavino-Junior D, Sime M, Encarnação L, Bastos-Filho T. A Human-  
751 Machine Interface Based on Eye Tracking for Controlling and Monitoring a Smart  
752 Home Using the Internet of Things. Sensors. 2019; 19:859-884. doi:  
753 10.3390/s19040859.
- 754 51. Ding Z, Luo J, Deng H. Accelerated exhaustive eye glints localization method for  
755 infrared video oculography. In: SAC '18 – Proceedings of the 33rd Annual ACM  
756 Symposium on Applied Computing; April 2018; Pau France. New York-NY  
757 (United States of America): Association for Computing Machinery; 2018. 620–627.  
758 doi: <https://doi.org/10.1145/3167132.3167200>.

- 759 52. Eid MA, Giakoumidis N, El-Saddik A. A Novel Eye-Gaze-Controlled Wheelchair  
760 System for Navigating Unknown Environments: Case Study with a Person with  
761 ALS. *IEEE Access*. 2016; 4:558-573. doi:10.1109/ACCESS.2016.2520093.
- 762 53. Giannotto EC. Uso de rastreamento do olhar na avaliação da experiência do tele-  
763 usuário de aplicações de TV interativa. M.Sc. Thesis, Polytechnic School of the  
764 University of São Paulo. Department of Computer Engineering and Digital  
765 Systems. 2009, 290 p. Available from:  
766 <https://teses.usp.br/teses/disponiveis/3/3141/tde-15042009-151212/pt-br.php>.
- 767 54. Duchowski AT. *Eye tracking methodology: Theory and practice*. 2nd ed. London:  
768 Springer-Verlag; 2007.
- 769 55. Anders S, Weiskopf N, Lule D, Birbaumer N. Infrared oculography—validation of  
770 a new method to monitor startle eyeblink amplitudes during fMRI. *NeuroImage*.  
771 2004; 22(2):767-770. doi: 10.1016/j.neuroimage.2004.01.024.
- 772 56. Sharma A, Abrol P. Eye gaze techniques for human computer interaction: a  
773 research survey. *International Journal of Computer Applications*. 2013; 71(9):18-  
774 29. doi: 10.5120/12386-8738.
- 775 57. Van Es MA, Hardiman O, Chio A, Al-Chalabi A, Pasterkamp RJ, Veldink JH, et al.  
776 Amyotrophic lateral sclerosis. *The Lancet*. 2017; 390(10107):2084-2098. doi:  
777 10.1016/S0140-6736(17)31287-4.
- 778 58. Alves ACJ, Matsukura TS. Revisão sobre avaliações para indicação de dispositivos  
779 de tecnologia assistiva. *Rev Ter Ocup Univ São Paulo*. 2014; 25(2):199-207. doi:  
780 10.11606/issn.2238-6149.v25i2p199-207.
- 781 59. Lovarini M, Mccluskey A, Curtin M. Editorial: Critically appraised papers. Limited  
782 high-quality research in the effectiveness of assistive technology. *Aust Occup Ther*  
783 *J*. 2006; 50(1):50.



- 784 60. Gelderblom GJ, De Witte LP. The assessment of assistive technology outcomes,  
785 effects and costs. *Technol and Disabil.* 2002; 14(3):91-94. doi: 10.3233/tad-2002-  
786 14302.
- 787 61. Tobii Eye Tracker 4C. Available from: [https://gaming.tobii.com/product/tobii-eye-](https://gaming.tobii.com/product/tobii-eye-tracker-4c/)  
788 [tracker-4c/](https://gaming.tobii.com/product/tobii-eye-tracker-4c/). Access in: February 24, 2019.
- 789 62. Tobii Dynavox. Gaze Point. Available from: [https://www.tobiidynavox.com/en-](https://www.tobiidynavox.com/en-us/software/free-resources/gaze-point-1/)  
790 [us/software/free-resources/gaze-point-1/](https://www.tobiidynavox.com/en-us/software/free-resources/gaze-point-1/). Access in: February 24, 2019.
- 791 63. Riberto M, Miyazaki MH, Jucá SSH, Sakamoto H, Pinto PPN, Battistella LR.  
792 Validação da Versão Brasileira da Medida de Independência Funcional. *Acta*  
793 *Fisiatr.* 2004; 11(2):72-76. doi: 10.5935/0104-7795.20040003.
- 794 64. Linacre JM, Heinemann AW, Wright BD, Granger CV, Hamilton BB. The structure  
795 and stability of the Functional Independence Measure. *Arch Phys Med Rehabil.*  
796 1994; 75:127-132. doi: 10.1016/0003-9993(94)90384-0.
- 797 65. Law M, Baptiste S, Carswell A, McColl M, Polatajko H, Pollock N. Medida  
798 canadense de desempenho ocupacional (COPM). Magalhães LC, Magalhães, LV,  
799 Cardoso AA, organizers and translators. Belo Horizonte: Ed UFMG; 2009.
- 800 66. Jutai J, Day H. Psychosocial Impact of Assistive Devices Scale (PIADS). *Technol*  
801 *and Disabil.* 2002; 14:107-111. doi: 10.1037/t45599-000.
- 802 67. Demers L, Weiss-Lambrou R, Ska B. The Quebec User Evaluation of Satisfaction  
803 with Assistive Technology (QUEST 2.0): an overview and recent progress. *Technol*  
804 *and Disabil.* 2002; 14:101-105. doi: 10.13072/midss.298.
- 805 68. Carvalho KEC, Gois Junior MB, Sá KN. Tradução e validação do Quebec User  
806 Evaluation of Satisfaction with Assistive Technology (QUEST 2.0) para o idioma  
807 português do Brasil. *Rev. Bras. Reumatol.* 2014; 54(4):260-267. doi:  
808 10.1016/j.rbr.2014.04.003.

- 809 69. Brooke J. SUS: a "quick and dirty" usability scale. In: Jordan PW, Thomas B,  
810 McClelland IL, Weerdmeester B, editors. Usability Evaluation in Industry.  
811 London: Taylor and Francis; 1996. 189-194.
- 812 70. Calvo A, Chiò A, Castellina E, Corno F, Farinetti L, Ghiglione P, et al. Eye  
813 tracking impact on Quality-of-life of ALS patients. In: Computers Helping People  
814 with Special Needs. Proceedings of 11th International conference on computers  
815 helping people with special needs; 9-11th July 2008; Linz (Austria): Springer-  
816 Verlag Berlin Heidelberg; 2008. 70-77. doi: 10.1007/978-3-540-70540-6.
- 817 71. Myburg M, Allan E, Nalder E, Schuurs S, Amsters D. Environmental control  
818 systems – the experiences of people with spinal cord injury and the implications for  
819 prescribers. *Disability and Rehabilitation: Assistive Technology*. 2017; 12(2):128-  
820 136. doi: 10.3109/17483107.2015.1099748.
- 821 72. Demers L, Wessels R, Weiss-Lambrou R, Ska B, de Witte LP. Key dimensions of  
822 client satisfaction with assistive technology: a cross-validation of a Canadian  
823 measure in the Netherlands. *J Rehabil Med*. 2001; 33:187-191. doi:  
824 10.1080/165019701750300663.
- 825 73. Shone SM, Ryan S, Rigby PJ, Jutai JW. Toward a comprehensive evaluation of the  
826 impact of electronic aids to daily living: evaluation of consumer satisfaction.  
827 *Disabil Rehabil*. 2002; 24:115-125. doi: 10.1080/09638280110066794.
- 828 74. Day H, Jutai J. Measuring the psychosocial impact of assistive devices: the PIADS.  
829 *Canadian Journal of Rehabilitation*. 1996; 9(2):159-168.
- 830 75. Bangor A, Kortum P, Miller JA. The System Usability Scale (SUS): An Empirical  
831 Evaluation. *International Journal of Human-Computer Interaction*. 2008; 24(6):574-  
832 594. doi: 10.1080/10447310802205776.

- 833 76. Little R. Electronic aids for daily living. *Phys Med Rehabil Clin N Am.* 2010;  
834 21:33-42. doi: 10.1016/j.pmr.2009.07.008.
- 835 77. Boman I-L, Tham K, Granqvist A, Bartfai A, Hemmingsson H. Using electronic  
836 aids to daily living after acquired brain injury: A study of the learning process and  
837 the usability. *Disability and Rehabilitation: Assistive Technology.* 2007; 2(1):23-  
838 33. doi: 10.1080/17483100600856213.
- 839 78. Boustany G, Itani AED, Youssef R, Chami O, Abu-Faraj ZO. Design and  
840 development of a rehabilitative eye-tracking based home automation system. In:  
841 Proceedings of 2016 3rd Middle East Conference on Biomedical Engineering  
842 (MECBME); 6-7<sup>th</sup> October 2016; Beirut (Lebanon). Institute of Electrical and  
843 Electronics Engineers (IEEE): Curran Associates, Inc.; Jan 2017. 30-33. doi:  
844 10.1109/MECBME.2016.7745401.
- 845 79. Brennan CP, McCullagh PJ, Galway L, Lightbody G. Promoting autonomy in a  
846 smart home environment with a smarter interface. In: Proceedings of 2015 37<sup>th</sup>  
847 Annual International Conference of the IEEE Engineering in Medicine and Biology  
848 Society (EMBC); August 25-29 2015; MiCo – Milano Conference Center, Milan  
849 (Italy). Institute of Electrical and Electronics Engineers (IEEE): Curran Associates,  
850 Inc.; Dec 2015. 5032-5035. doi: 10.1109/EMBC.2015.7319522.
- 851 80. Hooper B, Verdonck M, Amsters D, Myburg M, Allan E. Smart-device  
852 environmental control systems: experiences of people with cervical spinal cord  
853 injuries. *Disability and Rehabilitation: Assistive Technology.* 2018; 13(8):24-730.  
854 doi: 10.1080/17483107.2017.1369591.
- 855 81. Verdonck MC, Chard G, Nolan M. Electronic aids to daily living: be able to do  
856 what you want. *Disability and Rehabilitation: Assistive Technology.* 2010;  
857 6(3):268-281. doi:10.3109/17483107.2010.525291.

- 858 82. Judge S, Robertson Z, Hawley MS. Users' Perceptions of Environmental Control  
859 Systems. In: Emiliani PL, Burzagli L, Como A, Gabbanini F, Salminen A-L (eds.).  
860 Assistive Technology from Adapted Equipment to Inclusive Environments -  
861 AAATE 2009; August 31st–September 2nd 2009; Florence (Italy). Amsterdam:  
862 IOS Press; 2009. 426-431.
- 863 83. Harmer J, Bakheit AMO. The benefits of environmental control systems as  
864 perceived by disabled users and their carers. *British Journal of Occupational*  
865 *Therapy*. 1999; 62(9):394-398. doi: 10.1177/030802269906200902.
- 866 84. Palmer P, Seale J. Exploring the attitudes to environmental control systems of  
867 people with physical disabilities: a grounded theory approach. *Technol Disabil*.  
868 2007; 9(1):17-27. doi: 10.3233/TAD-2007-19103.
- 869 85. Costa CR, Ferreira FMRM, Bortolus MV, Carvalho MGR. Dispositivos de  
870 tecnologia assistiva: fatores relacionados ao abandono. *Cad. Ter. Ocup. UFSCar*.  
871 2015; 23(3):611-624. doi: 10.4322/0104-4931.ctoAR0544.7.8.
- 872 86. Verza R, Carvalho ML, Battaglia MA, Uccelli MM. An interdisciplinary approach  
873 to evaluating the need for assistive technology reduces equipment abandonment.  
874 *Mult Scler*. 2006; 12(1):88-93. doi: 10.1191/1352458506ms1233oa.  
875

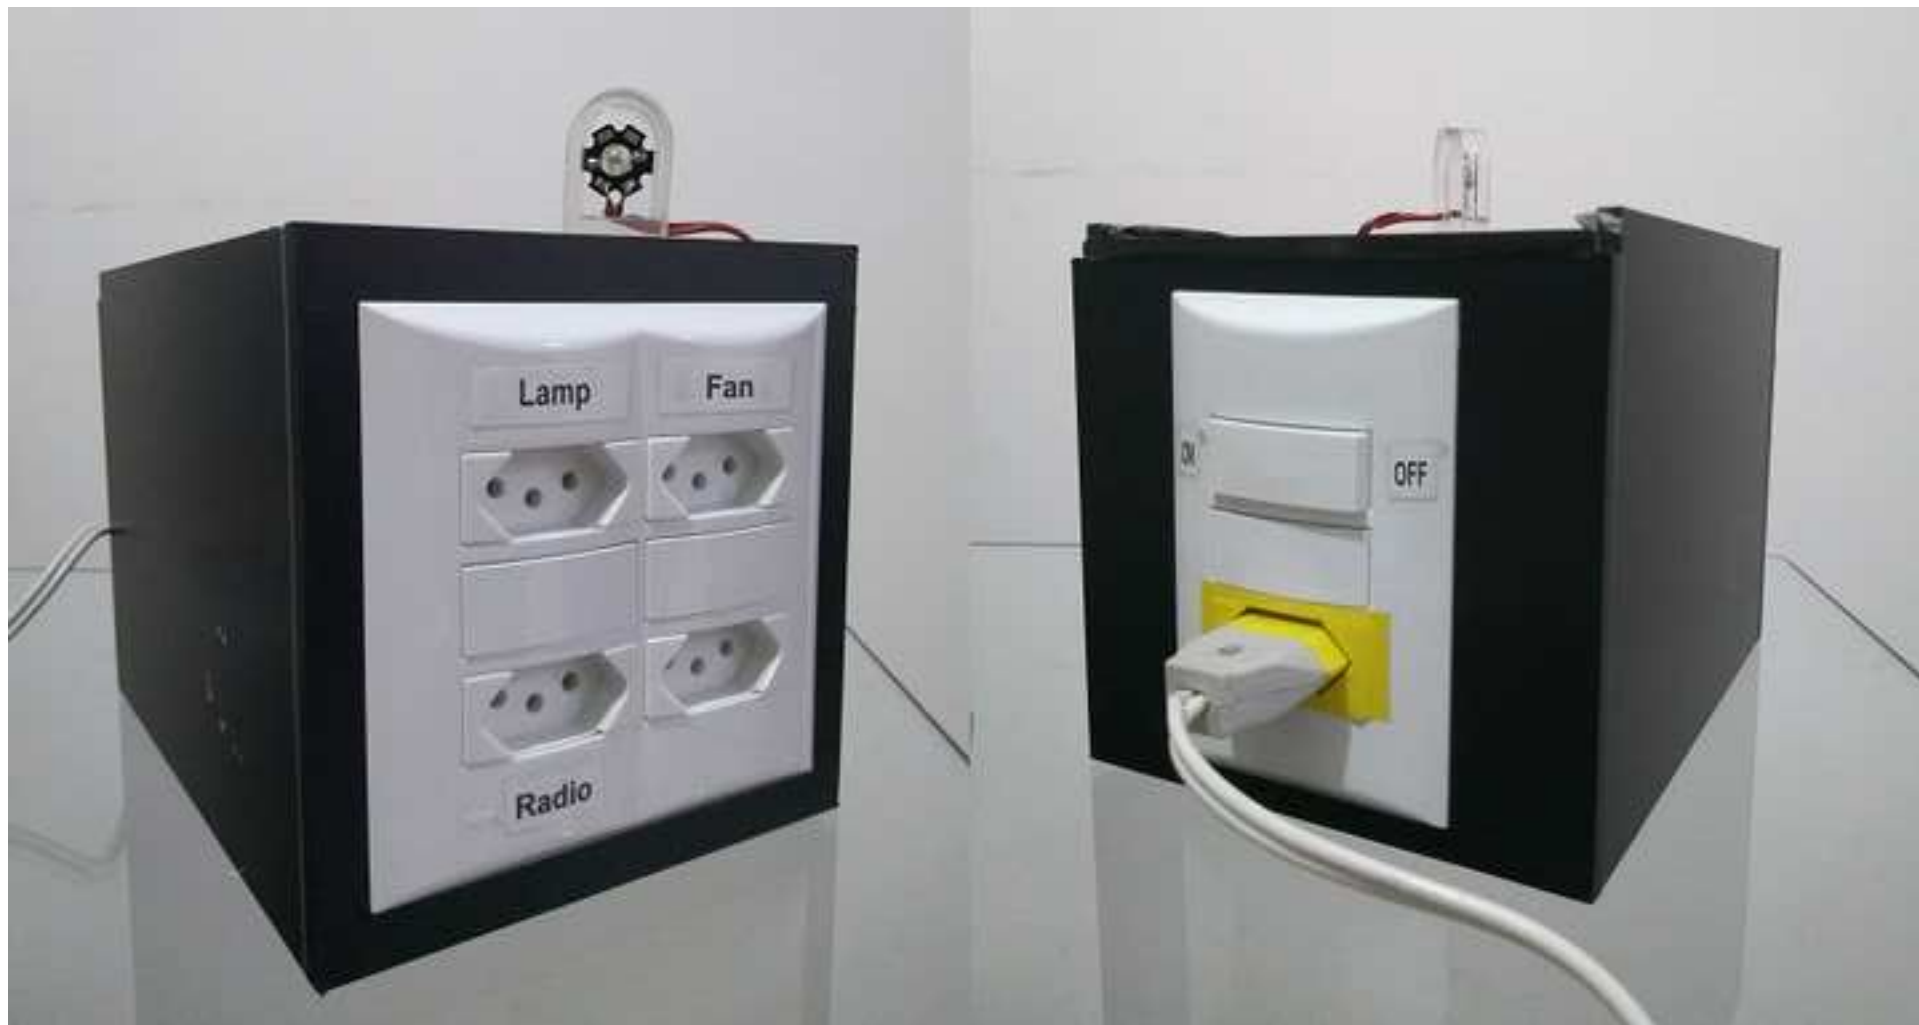

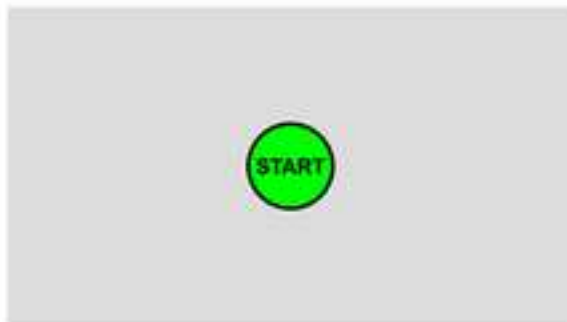

(a) Initial interface

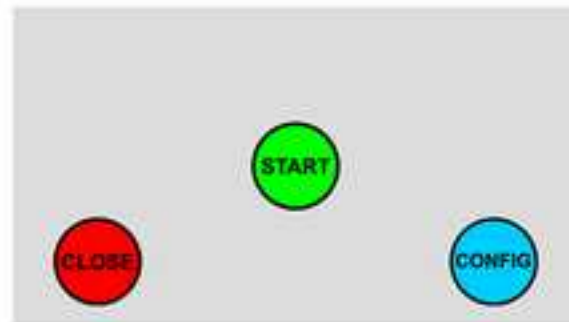

(b) Main menu

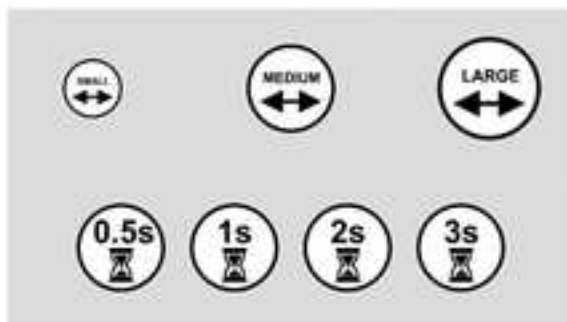

(c) Configuration menu

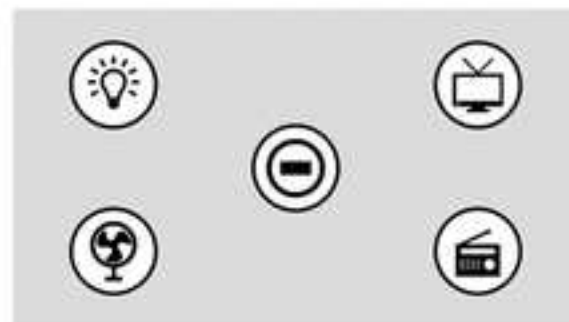

(d) Home devices control menu

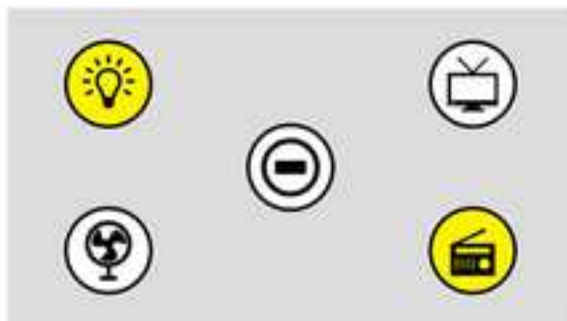

(e) Lamp and radio turned on

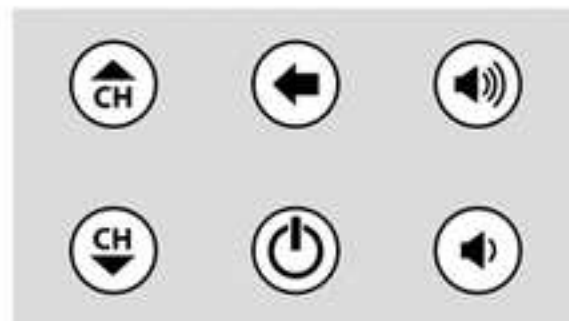

(f) TV submenu

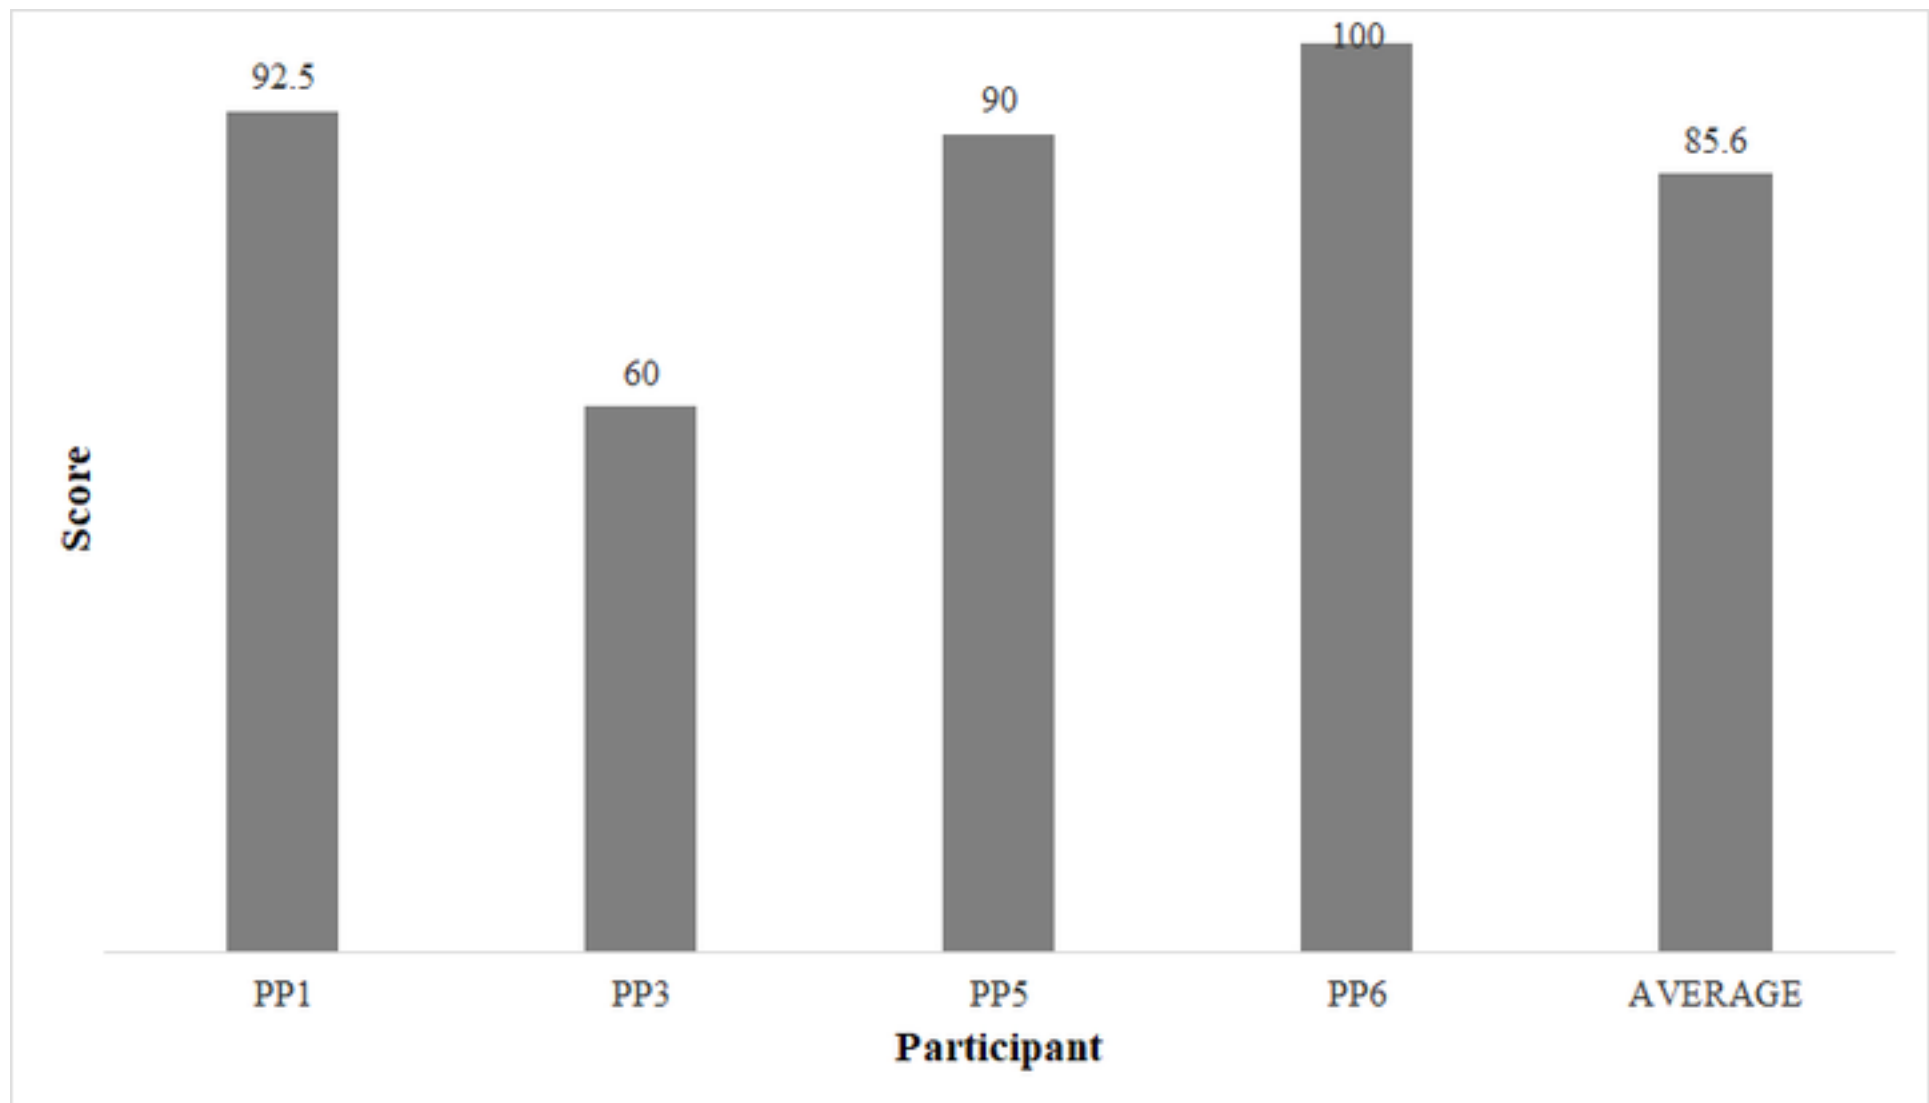

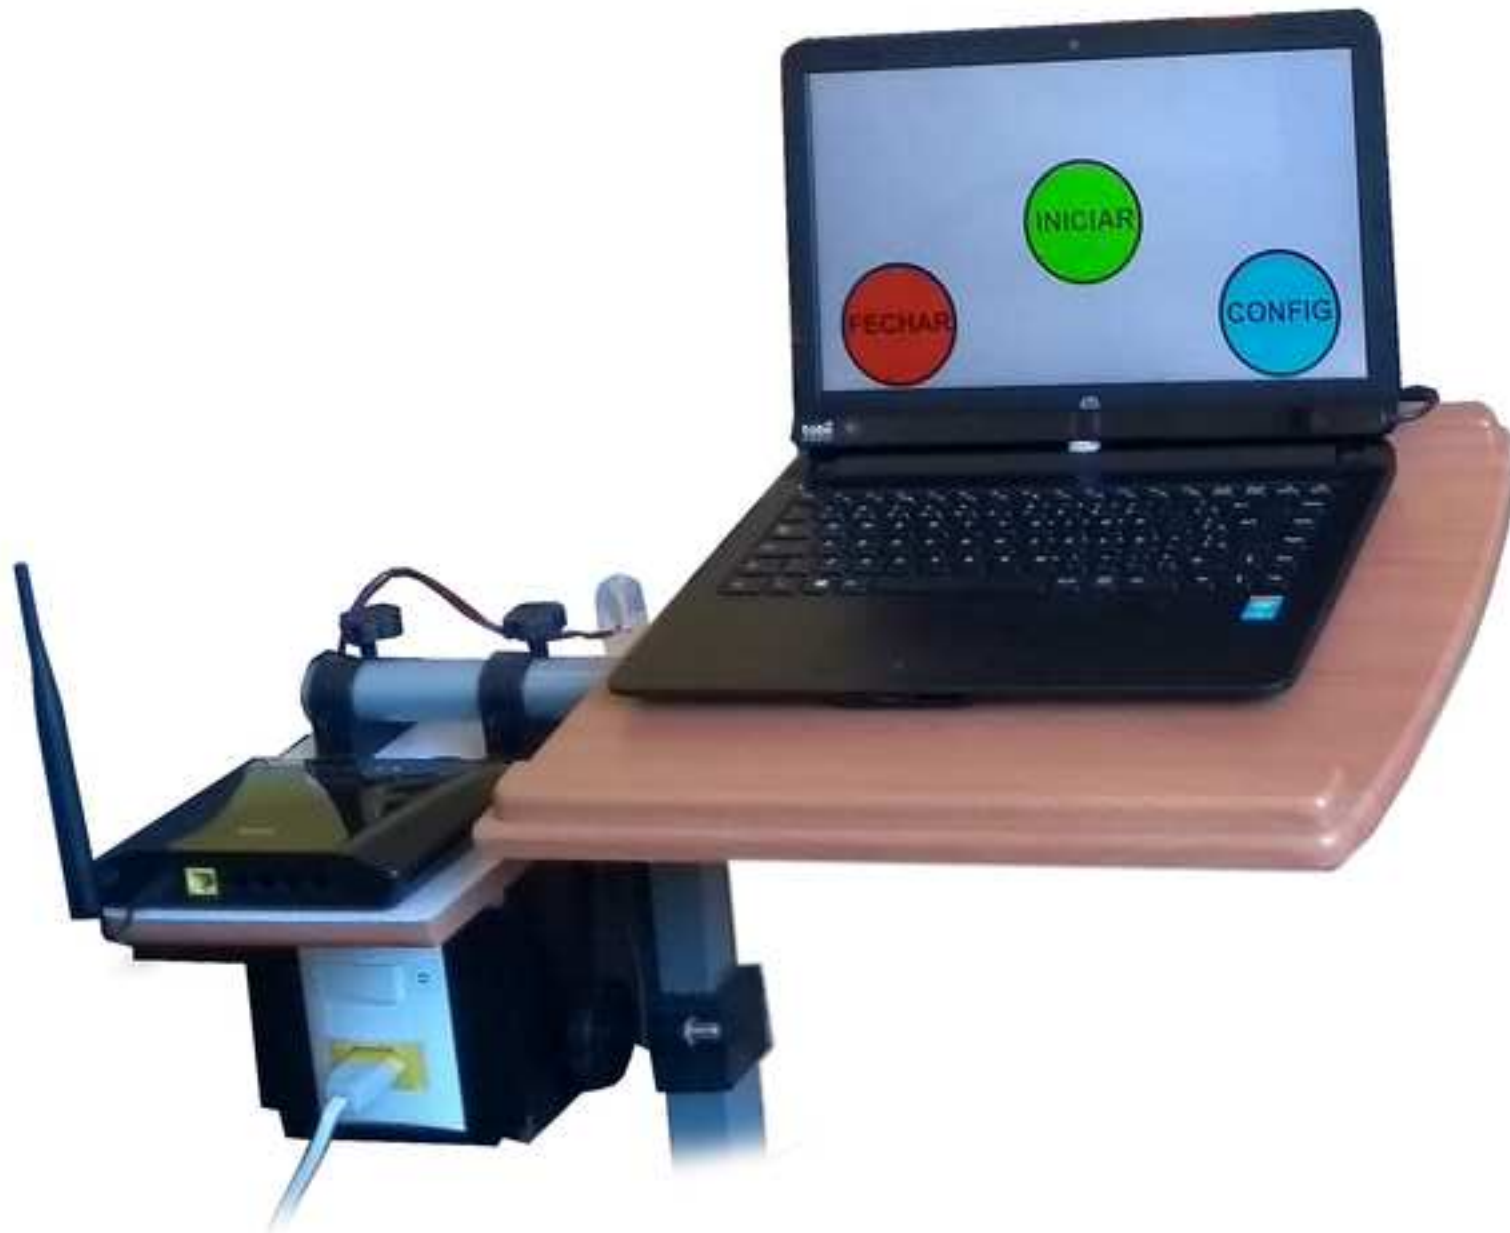



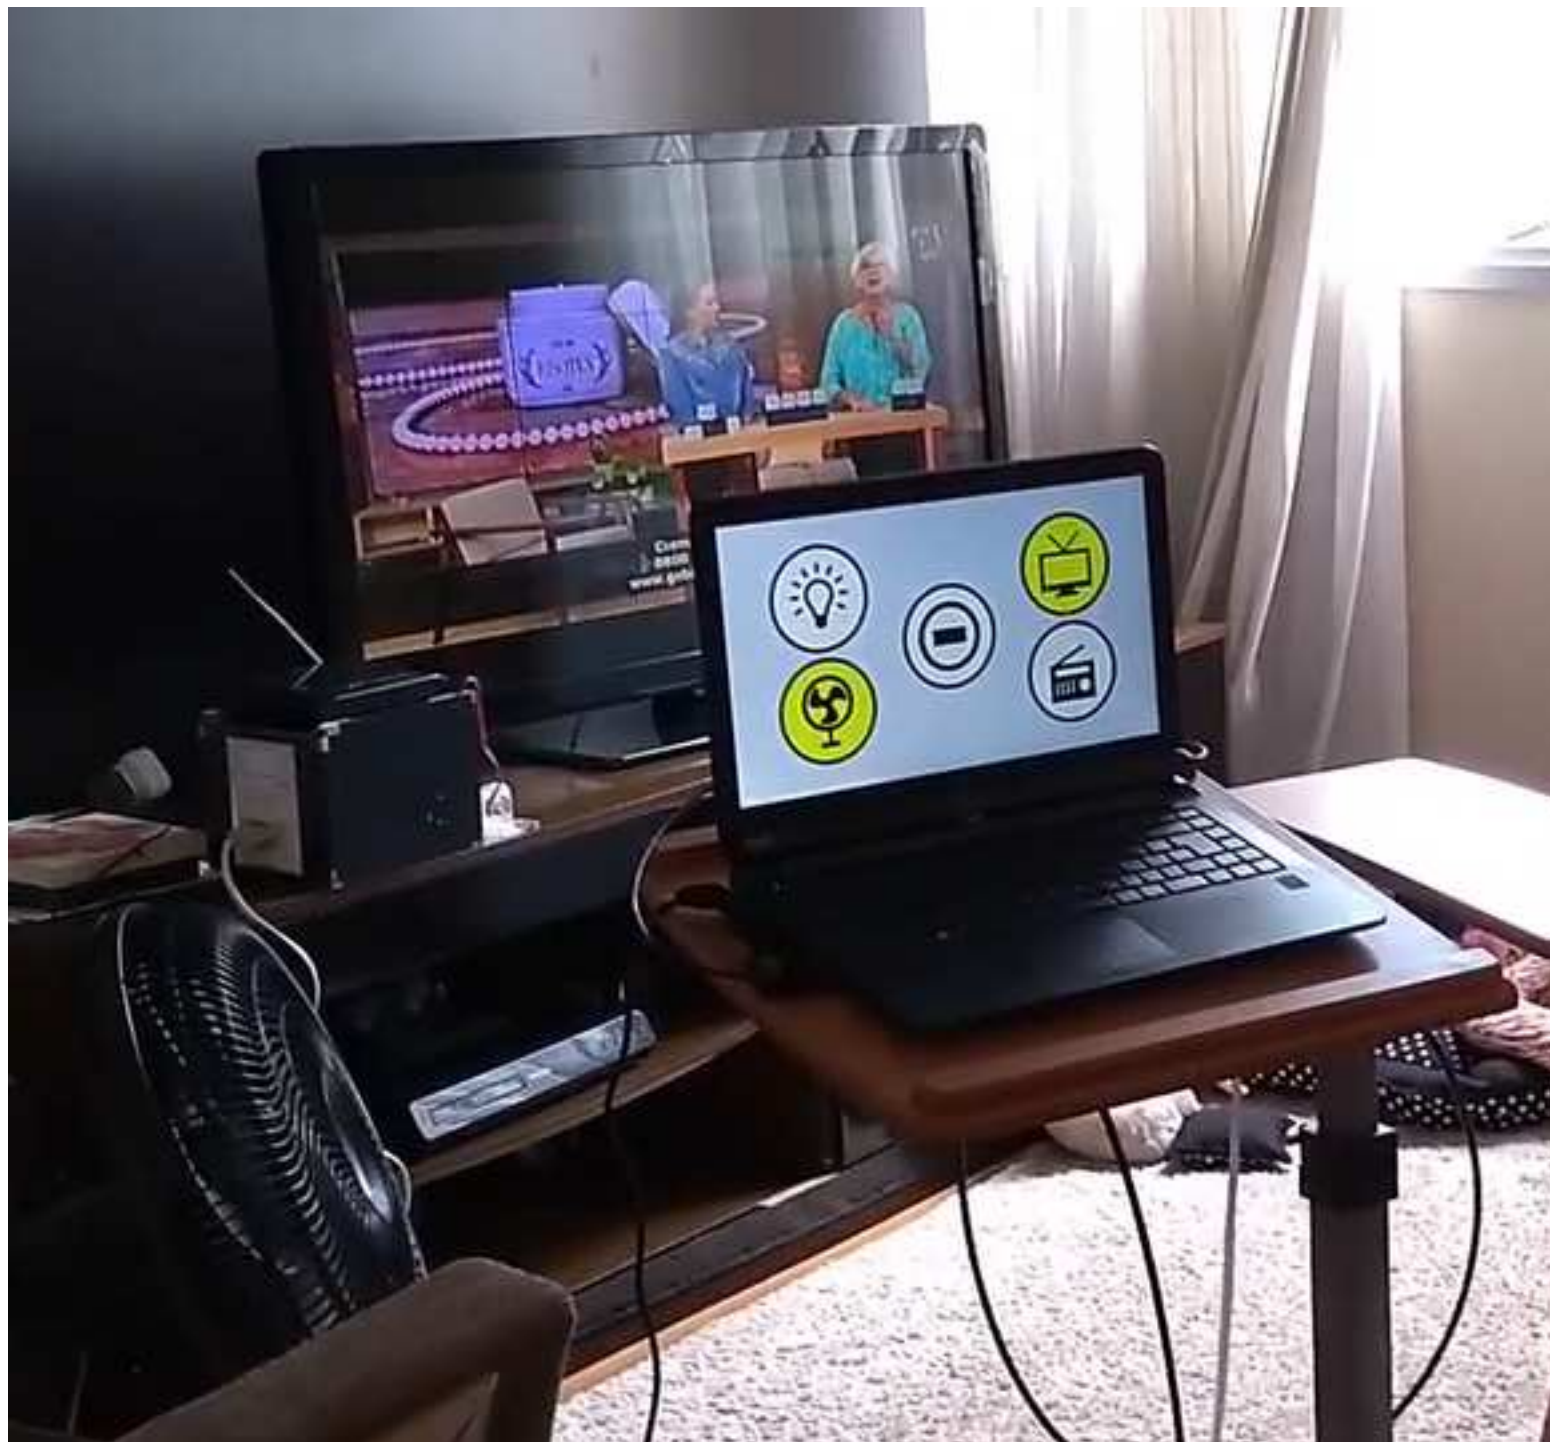

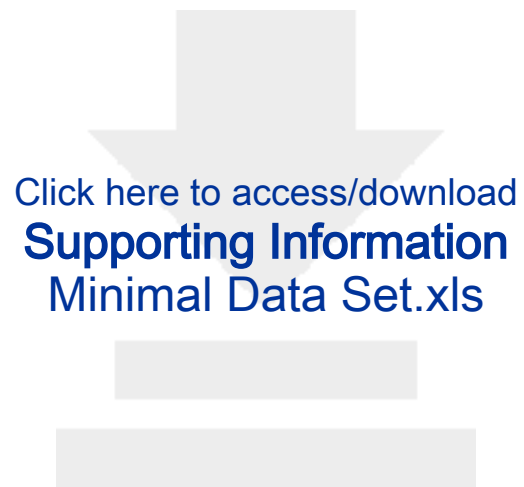

Click here to access/download  
**Supporting Information**  
Minimal Data Set.xls

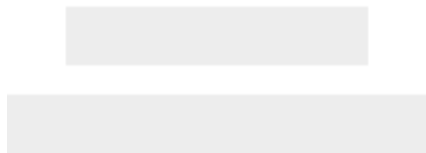

1 **Usability, occupational performance and satisfaction evaluation of a**  
2 **smart environment controlled by infrared oculography by people with**  
3 **severe motor disabilities**

4

5 Mariana Midori Sime<sup>1\*¶,#a</sup>, Alexandre Luís Cardoso Bissoli<sup>2&</sup>, Daniel Lavino-Júnior<sup>3&</sup>,  
6 Teodiano Freire Bastos-Filho<sup>4¶,#b</sup>

7

8 <sup>1</sup> Occupational Therapy Department, Federal University of Espírito Santo (UFES),  
9 Vitória, Brazil

10 <sup>2</sup> Postgraduate Program in Electrical Engineering, Electrical Engineering Department,  
11 Federal University of Espírito Santo (UFES), Vitória, Brazil

12 <sup>3</sup> Electrical Engineering Department, Federal University of Espírito Santo (UFES),  
13 Vitória, Brazil

14 <sup>4</sup> Postgraduate Program in Electrical Engineering, Electrical Engineering Department  
15 and Postgraduate Program in Biotechnology, Federal University of Espírito Santo  
16 (UFES), Vitória, Brazil

17

18 <sup>#a</sup> Current Address: Department of Occupational Therapy, Federal University of  
19 Espírito Santo – Campus Maruípe, Vitória, Brazil.

20 <sup>#b</sup> Current Address: Postgraduate Program in Electrical Engineering, Federal  
21 University of Espírito Santo – Campus Goiabeiras, Vitória, Brazil.

22

23 \* Corresponding author

24 E-mail: [mariana.sime@ufes.br](mailto:mariana.sime@ufes.br) (MMS)

25

26 ¶ These authors contributed equally to this work.

27 & These authors also contributed equally to this work.

28

29

30

31

## 32 Abstract

33 A smart environment is an assistive technology **space** that can enable people with  
34 motor disabilities to control their equipment (TV, radio, fan, etc.) through a human-  
35 machine interface activated by different inputs. However, assistive technology  
36 resources are not always considered useful, reaching quite high abandonment rate. This  
37 study aims to evaluate the effectiveness of a smart environment controlled through  
38 infrared oculography by people with severe motor disabilities. The study sample was  
39 composed of six **individuals with motor disabilities**. Initially, sociodemographic data  
40 forms, the Functional Independence Measure (FIM<sup>TM</sup>), and the Canadian Occupational  
41 Performance Measure (COPM) were applied. The **participants** used the system in their  
42 domestic environment for a week. Afterwards, they were reevaluated with regards to  
43 occupational performance (COPM), satisfaction with the use of the assistive  
44 technology resource (QUEST 2.0), psychosocial impact (PIADS) and usability of the  
45 system (SUS), as well as through semi-structured interviews for suggestions or  
46 complaints. **The most common demand from the participants of this research was**  
47 **‘control of the TV’. Two participants did not use the system. All participants who used**  
48 **the system (four) presented positive results in all assessment protocols, evidencing**  
49 **greater independence in the control of the smart environment equipment. In addition,**  
50 **they evaluated the system as useful and with good usability. Non-acceptance of**  
51 **disability and lack of social support may have influenced the results.**

52  
53 **Keywords:** smart environment; smart home; people with disabilities; assistive  
54 technology; infrared oculography; effectiveness

55

56

## 57 **Introduction**

58 Assistive technology (AT) can be defined as an area of knowledge that includes  
59 products, resources, methodologies, strategies and services [1], or items, products and  
60 equipment acquired, adapted or modified [2], always with the aim of improving the  
61 functional performance, independence, and quality of life (QoL) of people with  
62 disabilities [1,2].

63 The literature indicates that individuals with diseases or injuries that affect the  
64 central nervous system, such as Multiple Sclerosis, Amyotrophic Lateral Sclerosis,  
65 Stroke, and Cranioencephalic or Spinal Cord Injury, can present sensory, motor,  
66 language and behavioral impairments at different levels, which lead to deficits in their  
67 occupational performance for carrying out Activities of Daily Living (ADL)  
68 independently, or interacting with people and objects [3–11], making them quite  
69 dependent on family members and/or caregivers [12].

70 According to the International Classification of Functioning, Disability and Health  
71 (ICF), people's impairments are configured as their environments/contexts limit their  
72 activities and restrict their social participation, not favoring their functionality [13–15].

73 The elements that constitute the ICF's model are Health Condition, Body Functions  
74 and Structures, and Activity, Participation, and Contextual Factors (Environmental and  
75 Personal), with AT devices and resources included in Environmental Factors [13–15],  
76 which improve the functionality of people with motor disabilities and/or older people, in  
77 different areas and health conditions [4,16–23].

78 However, although AT plays an important role in the recovery or improvement of  
79 the functionality of people with disabilities, the rates of abandonment and/or non-use of  
80 AT devices are high [25–28] for many reasons [19,23,24,28].

81        Conceptual models assist researchers and professionals with making better  
82 indications and implementation of AT devices. For instance, the Human Activity  
83 Assistive Technology (HAAT) model proposes to understand the role played by AT in  
84 the lives of people with disabilities. The HAAT model is based on four elements: the  
85 Human, the Activity, the Assistive Technology, and the Context in which the other  
86 three elements are inserted. It briefly describes “someone (human) doing something  
87 (activity) in a context using assistive technology” [29] (p.7).

88        Thus, during the process of preparing and/or indicating an AT resource or device, it  
89 is important to understand the activity that the person wants and needs to perform, the  
90 capacities they have, and the different aspects of the context that will influence their  
91 acquisition and use. Several studies have highlighted the importance of patient/user  
92 participation in the development of AT resources or devices [22,30–32], or in the  
93 process of defining and choosing the device that best suits their needs and of training  
94 and updating the team to evaluate and monitor the AT use [22,24,27,33].

95        Although there are several definitions of Smart Environment (SE) [34–36], it can  
96 be defined as a space (room, house, etc.) where services (temperature, lighting,  
97 entertainment, security, etc.) and/or equipment (lamps, home appliances, alarms, etc.)  
98 are managed intelligently using technology (personal computer, tablet, smartphone,  
99 remote control, etc.), through a Human-Machine Interface (HMI), aiming to assist users  
100 or residents with their ADL and provide them with better QoL [37,38].

101        Many studies have focused on the development of SEs that aim to provide greater  
102 independence for people with motor disabilities, combining their residual skills with the  
103 physical environment, since this group experiences several limitations in the use of  
104 environments and equipment control [37,39–45]. The secondary objective is to reduce  
105 their need for assistance from caregivers or family members [45].

106 Despite the gradual increase in the number of these studies, only few of them have  
107 addressed the benefits of SEs for people with disabilities regarding the exercise of  
108 autonomy, i.e., freedom of opinion, choice and decision [46], improvement of  
109 performance, and usability.

110 The reviews by Martin et al. [47] and Brandt et al. [48] found no evidence about the  
111 effectiveness of SEs for people with disabilities. Differences in sample size,  
112 interventions, and instruments used hinder comparison between these studies, but it was  
113 possible to notice a tendency to facilitate independence, instrumental ADL,  
114 socialization, and QoL.

115 Marikyan, Papagiannidis and Alamanos [49] consider that there is increased  
116 research addressing SEs; however, they are restricted to three themes: they ignore the  
117 multiple diversities of the concepts; focus on the functioning of technological devices,  
118 **and** architecture and infrastructure; are little dedicated to the perspective of users.

119 For the control of electronic equipment in an SE by people with motor disabilities,  
120 different ways of capturing their inputs can be used. Among them, Infrared  
121 Oculography (IROG) is a technique that has been significantly studied in computer  
122 science [42,45,50–52].

123 In IROG, a device performs eye movement tracking, calculating the point on the  
124 computer screen the user is looking at. Eye tracking devices have a video camera  
125 equipped with high resolution infrared (IR) light-emitting diodes (LED) that reflect and  
126 increase the contrast between the pupil and the iris, allowing precise pupil location and  
127 facilitating the tracking of eye movement. This movement then functions as an HMI  
128 modality, enabling users to control several applications [53–55].

129 This technique has proved to be one of the most indicated and useful for people  
130 with severe motor disabilities, enabling them to use HMIs in an easier, comfortable and

131 intuitive way [56], without the need to place electrodes or equipment on their bodies.  
132 ~~Another contributing factors~~ **factor is** that eye movement is one of the few abilities maintained  
133 in people with severe motor disabilities [57].

134 Since the literature points to a lack of studies that address the effectiveness  
135 provided by AT [58,59] as well as the importance of good assessment using valid,  
136 reliable and viable instruments, and covering various resource aspects [60], it is  
137 important that further studies addressing the effectiveness of SEs in the everyday life of  
138 people with severe motor disabilities be conducted.

139 The SE system used in this study was developed at the Assistive Technology  
140 Center of the Federal University of Espirito Santo (UFES), Brazil. It consists of a smart  
141 global box (gBox) coupled to a computer software that enables the user to control the  
142 TV, radio, fan and/or lighting using eye-tracking technology [50].

143 In this sense, the main objective of this study was to evaluate the effectiveness of  
144 the developed SE controlled through IROG for specific use by people with severe motor  
145 disabilities.

146

## 147 **Materials and Methods**

148 This study was approved by the Human Research Ethics Committee of Federal  
149 University of Espirito Santo, Brazil, under protocol no. 976.828, CAAE  
150 39410614.6.0000.5060. All participants or their legal guardians signed and received a  
151 copy of the Free and Informed Consent Form, allowing the publication of their data  
152 collected in the research, as long as the confidentiality of personal information is  
153 guaranteed.

154

## 155 **Materials**



156 The following materials were used in this study:

157 1. Notebook computer with Intel® Core™ i3-5005U processor, Windows® 10 Home  
158 Edition operating system, 4GB RAM, 500 GB HD memory, and 14" LED screen. 2.  
159 Tobii Eye Tracker 4C [61], which allows: a) booting with the computer, b) controlling  
160 with only one or both eyes, c) making movements with the head, maintaining the  
161 calibration. 3. Gaze Point software [62]: to control the mouse cursor using Tobii Eye  
162 Tracker 4C. 4. Global Box (gBox) (Fig 1): an SE controller module [50] that receives  
163 commands from the computer, via Wi-Fi, to activate home devices. 5. SE Control  
164 Interface (CI) (Fig 2) [50]: configured in a Web application in which it is possible to  
165 download the use data history, among other options. 6. Wi-Fi Router: to send the signal  
166 from the notebook computer to the gBox. 7. Portable table: used to position the  
167 equipment (Fig 3), facilitating its transport and use.

168

169 **Fig 1. gBox: electronic module to control home devices in the SE.**

170

171 **Fig 2. User CI. Reproduced with permission from [50].**

172 After clicking on START (a), the main menu (b) appears on the screen and  
173 the user can go to the icon associated with the device they wish to control  
174 (START), configure the system (CONFIG) (c), or return to the initial screen  
175 (CLOSE). To activate the devices (d), the mouse cursor must be positioned on  
176 desired icon for the time defined in the settings, then its background turns yellow  
177 (e), except for the TV icon, which has an individual submenu (f) to turn it on/off or  
178 control its channels or volume.

179

180 **Fig 3. Portable table, eye tracker, and notebook computer are installed.**

181

## 182 **Data collection instruments**

183       The following instruments were used to collect information about the participants  
184 during HMI use:

185       Sociodemographic data forms: used to collect the participants' personal data,  
186 information on the diagnosis and history of the disease or injury, and experience with  
187 technology.

188       Functional Independence Measure (FIM<sup>TM</sup>) [63,64]: it assesses the degree of  
189 assistance needed for users to perform motor and cognitive ADL.

190       Canadian Occupational Performance Measure (COPM) [65]: it evaluates changes in  
191 the client's perception of their performance in activities and their satisfaction with them.

192       Psychosocial Impact of Assistive Devices Scale (PIADS) [66]: it assesses the  
193 effects of an AT device on the functional independence, well-being and QoL of users.

194       Quebec User Evaluation of Satisfaction with Assistive Technology (QUEST 2.0)  
195 [67,68]: it measures satisfaction with the AT resource and the service delivered.

196       System Usability Scale (SUS) [69]: it evaluates the usability of the environment  
197 control system.

198       Semi-structured interviews: they were audio recorded, carried out to obtain  
199 information about the process of using the system (positive and negative points, and  
200 suggestions).

201

## 202 **Participants**

203       **Inclusion criteria:** people aged  $\geq 18$  years with motor disabilities that compromised  
204 the normal interaction with equipment in the home environment, indicated by

205 rehabilitation institutions or professionals; they should also have a caregiver of age and  
206 literate. **Exclusion criteria:** individuals with cognitive deficits (related by their assisting  
207 professionals) that compromised understanding of the equipment functioning and use, as  
208 well as of the assessment instruments, and with visual deficits not corrected by glasses or  
209 contact lenses.

210

## 211 **Procedures**

212 A visit to each of the **participant**'s homes was scheduled for the initial assessment  
213 and installation of the system. After acceptance, each **participant** or caregiver signed a  
214 FICF, responded to the sociodemographic data form and the **FIM<sup>TM</sup>** and COPM measures,  
215 **the last directed to activities that require the use of equipment.**

216 The system was installed in the residence room most used during the day as indicated  
217 by the **participant** or caregiver (Figure 4).

218

219 **Fig 4. System installed in the home of one of the study participants.**

220

221 Both the **participant** and the caregiver were trained to use the system and received a  
222 copy of the user manual containing explanations on the eye tracker calibration and  
223 equipment control. **The caregiver's role was to turn on the notebook computer, position**  
224 **the portable table, and calibrate the eye tracker whenever necessary.**

225 The system remained installed at each participants' homes for one week, as in the  
226 study conducted by Calvo et al. [70]. When necessary, extra visits to the participants'  
227 homes were made in order to make adjustments or assist with use.

228 At the end of that period, reassessments were carried out using the COPM, the other  
229 instruments (QUEST 2.0, PIADS, and SUS), and the semi-structured interview.

230 It is worth mentioning that a pilot study was previously carried out with a participant  
 231 with motor disabilities aiming to verify the system functionality in a common home  
 232 environment, and whether the methodology was adequate to the study objectives.

233 The pre- and post-test statistical analyses of the COPM instrument were performed  
 234 using the Paired Sample *t*-Test considering a statistically significant difference of 5%  
 235 ( $p < 0.05$ ). This statistical test was chosen because of its robustness, considering the low  
 236 sampling power obtained with small samples. Results of the other instruments are  
 237 presented descriptively.

238

## 239 Results

240 Six people with disabilities participated in this study. Of these, two individuals did  
 241 not use the system during the period that the equipment remained in their homes, and  
 242 their cases will be presented and discussed separately.

243 Table 1 shows the main information about the participants who used the system.

244

245 **Table 1. Data of participants who used the system**

| <b>Participant</b> | <b>Gender</b>  | <b>Type of caregiver</b>                 | <b>Health condition</b>                | <b>Time elapsed since diagnosis</b> |
|--------------------|----------------|------------------------------------------|----------------------------------------|-------------------------------------|
| <b>PP1</b>         | F <sup>a</sup> | Informal caregiver <sup>c</sup>          | ALS <sup>e</sup> + Psoriatic Arthritis | 5 months                            |
| <b>PP3</b>         | F              | Informal + formal caregiver <sup>d</sup> | Autoimmune vasculitis                  | 8 years                             |
| <b>PP5</b>         | M <sup>b</sup> | Informal caregiver                       | SCI <sup>f</sup> (incomplete C7 level) | 29 years                            |
| <b>PP6</b>         | M              | Informal caregivers                      | ALS                                    | 1 year and 9 months                 |

246 <sup>a</sup>F – Female; <sup>b</sup>M – Male; <sup>c</sup>Informal caregiver – refers to a family member who cares the person;  
 247 <sup>d</sup>Formal caregiver – refers to a professionals who are paid to care; <sup>e</sup>ALS – Amyotrophic Lateral  
 248 Sclerosis; <sup>f</sup>SCI – Spinal Cord Injury.

249

250 The mean age of participants was 49 years, ranging from 30 to 63 years. Participants  
 251 PP1, PP5, and PP6 presented basic knowledge of technologies, more focused on the use  
 252 of cell phones. Participant PP3, the youngest, had intermediate knowledge in using  
 253 computers and cell phones before presenting the disease signs and symptoms.

254 Table 2 presents the results on functional independence collected through the FIM™.

255

256 **Table 2. FIM™ results of participants who used the system**

| <b>Participant</b> | <b>Motor FIM™</b> | <b>Cognitive FIM™</b> | <b>Total FIM™</b> |
|--------------------|-------------------|-----------------------|-------------------|
| <b>PP1</b>         | 47/91             | 35/35                 | 82/126            |
| <b>PP3</b>         | 25/91             | 23/35                 | 48/126            |
| <b>PP5</b>         | 44/91             | 35/35                 | 79/126            |
| <b>PP6</b>         | 67/91             | 35/35                 | 102/126           |

257

258 As previously described, the FIM™ score considers the need for assistance in each  
 259 activity. The participants' lower motor scores refer to difficulties in performing ADLs as  
 260 well as in holding and manipulating objects used daily. Participant PP3 presented a lower  
 261 cognitive score as a result of difficulty in communication.

262 In the COPM assessment, the participants were asked to indicate which activities  
 263 were important in their everyday lives. Having 'control of the TV' was considered  
 264 important by all participants, being able to 'turn the fan on/off' was deemed essential by  
 265 two participants (PP5 and PP6), and having 'control of the lights' was a significant  
 266 demand for only one of the participants (PP1).

267 At reassessment, participants PP1, PP5 and PP6 responded to the instruments with  
 268 the help of the researcher to make markings on paper, and the interview was answered  
 269 without help. With regard to participant PP3, the interview was conducted with her  
 270 mother and, for the other evaluations, the scales were designed in the notebook computer  
 271 and the participant indicate the alternative most appropriate moving the mouse cursor.

272 The COPM was fully answered by the participant. The SUS and QUEST 2.0 were

273 answered jointly with the participant's mother. Due to ~~tiredness~~, her mother responded to  
 274 the PIADS based on what she believed her daughter's responses would be.

275 Results of the COPM and the Paired Sample *t*-Test for all participants are shown in  
 276 Table 3.

277

278 **Table 3. COPM and Paired Sample *t*-Test results of participants who used the**  
 279 **system**

| Participant              | Demands               | Performance     |                 | Satisfaction    |                 | Change                       |                              |
|--------------------------|-----------------------|-----------------|-----------------|-----------------|-----------------|------------------------------|------------------------------|
|                          |                       | P1 <sup>a</sup> | P2 <sup>b</sup> | S1 <sup>c</sup> | S2 <sup>d</sup> | P2<br>Total -<br>P1<br>Total | S2<br>Total -<br>S1<br>Total |
| PP1                      | Control of the TV     | 7               | 8               | 5               | 8               |                              |                              |
|                          | Control of the lights | 6               | 7               | 5               | 8               |                              |                              |
|                          | Total score           | 6.5             | 7.5             | 5               | 8               | 1                            | 3                            |
| PP3                      | Control of the TV     | 1               | 7               | 1               | 7               |                              |                              |
|                          | Total score           | 1               | 7               | 1               | 7               | 6                            | 6                            |
| PP5                      | Control of the TV     | 1               | 10              | 5               | 10              |                              |                              |
|                          | Turn the fan on/off   | 1               | 10              | 1               | 10              |                              |                              |
|                          | Total score           | 1               | 10              | 3               | 10              | 9                            | 7                            |
| PP6                      | Control of the TV     | 3               | 9               | 3               | 10              |                              |                              |
|                          | Turn the fan on/off   | 5               | 9               | 3               | 10              |                              |                              |
|                          | Total score           | 4               | 9               | 3               | 10              | 5                            | 7                            |
| <b><i>p</i>-value*</b>   |                       | Performance     |                 | Satisfaction    |                 |                              |                              |
| <b>Control of the TV</b> |                       | 0.045           |                 | 0.009           |                 |                              |                              |
| <b>COPM total score</b>  |                       | 0.050           |                 | 0.009           |                 |                              |                              |

280 <sup>a</sup> P1- initial performance; <sup>b</sup> P2- final performance; <sup>c</sup> S1- initial satisfaction; <sup>d</sup> S2- final  
 281 satisfaction. \* Paired Sample *t*-Test ( $p < 0.05$ ).  
 282

283 For the Paired Sample *t*-Test, only the events 'control of the TV' and 'COPM total  
 284 score' were analyzed, as these events were common to all participants.

285 Statistically significant results were observed for performance and satisfaction  
 286 regarding ‘control of the TV’ and for total satisfaction after using the system. Borderline  
 287 results were obtained with respect to total performance.

288 Table 4 shows the results obtained with application of the QUEST 2.0 instrument.  
 289 The results are very close or equal to 5.0 (the highest possible score), corresponding to  
 290 high levels of satisfaction.

291

292 **Table 4. QUEST 2.0 scores**

| <b>Participant</b> | <b>Resource</b> | <b>Service delivery</b> | <b>Total</b> |
|--------------------|-----------------|-------------------------|--------------|
| <b>PP1</b>         | 4.5             | 5.0                     | 4.7          |
| <b>PP3</b>         | 4.4             | 5.0                     | 4.6          |
| <b>PP5</b>         | 5.0             | 5.0                     | 5.0          |
| <b>PP6</b>         | 5.0             | 5.0                     | 5.0          |

293

294 Table 5 presents the items that the participants considered most important about the  
 295 SE control system. Each participant should indicate three items, and ‘effectiveness’ was  
 296 pointed by three of the four participants as an important feature of the SE tested.

297

298 **Table 5. Important items regarding the SE system**

| <b>Item</b>                  | <b>Number of citations</b> |
|------------------------------|----------------------------|
| <b>Effectiveness</b>         | 3                          |
| <b>Adjustment</b>            | 2                          |
| <b>Simplicity of use</b>     | 2                          |
| <b>Professional services</b> | 2                          |
| <b>Follow-up services</b>    | 1                          |
| <b>Comfort</b>               | 1                          |
| <b>Safety</b>                | 1                          |

299

300 As for the PIADS instrument, Table 6 presents the score for each subscale and the  
 301 final average of the participants, in which participants PP1, PP5, and PP6 were close to  
 302 the maximum score (3.0).

303

304 **Table 6. PIADS subscale scores**

| <b>Participant</b> | <b>Competence</b> | <b>Adaptability</b> | <b>Self-esteem</b> | <b>Average</b> |
|--------------------|-------------------|---------------------|--------------------|----------------|
| <b>PP1</b>         | 2.6               | 3.0                 | 3.0                | 2.9            |
| <b>PP3</b>         | 1.3               | 0.7                 | 1.8                | 1.3            |
| <b>PP5</b>         | 2.5               | 3.0                 | 2.6                | 2.7            |
| <b>PP6</b>         | 2.8               | 3.0                 | 2.3                | 2.7            |

305

306 Figure 5 illustrates the results of the SUS, whose average score was 85.6.

307

308 **Fig 5. SUS results of participants who used the system.**

309

310 Through the interviews, all participants who used the SE system found it useful,  
 311 mainly because it provided them with greater independence and exercise of autonomy in  
 312 controlling the equipment, as it can be verified in some of their answers:

313 *“Ah, it is useful in all aspects, right? Turn on, turn off”* (PP1)

314 *“I think it was good. I think (PP3) was happy to get it, right? You saw her expression  
 315 of joy, right? So, it was (useful). The part that I found most positive is giving autonomy,  
 316 right? This is fundamental!”* (PP3’s mother)

317 *“Its ... accessibility to be able to move. (...) it was very useful ... with the difficulty that  
 318 I have (...). The facility for you to pick up and do things”* (PP5)

319 *“It brings independence! Not depending on anybody to ‘turn up the volume!’, ‘Switch  
 320 channels!’, or ‘turn on the television!’, ‘turn off the television!’”* (PP6)

321

322 As examples of difficulties or aspects that need to be improved in our system, the  
 323 participants reported the delay to switch between distant TV channels; feeling tired or  
 324 having a mild headache caused by the use of the eye tracker; dependence on a caregiver



325 or family member to start the system and open the CIs; complicated process for  
 326 calibrating the eye tracker.

327 The following suggestions were made: a numeric keyboard to type the desired  
 328 channel; remove the need to use the notebook computer keyboard for some tasks, such as  
 329 login to CI; make the system simpler and more intuitive for people with little experience  
 330 with computers; allow the system to also control all the home lighting of the residence  
 331 and make and receive phone calls via a smartphone.

332 Regarding the user manual, participants PP1, PP5 and PP6 reported that they did not  
 333 need to access it, because the explanation and training provided by the researchers were  
 334 sufficient to use the SE system. Participant PP3's mother, on the other hand, reported that  
 335 the manual did not clarify her doubts, requiring the presence of one of the researchers.

336 The system usage records, obtained through the Web application, enabled  
 337 verification of the number of days that each participant effectively used the SE (Table 7).  
 338

339 **Table 7. Usage registration information obtained through the Web application**

| <b>Participant</b> | <b>Number of days of use</b> |
|--------------------|------------------------------|
| <b>PP1</b>         | 2                            |
| <b>PP3</b>         | 5                            |
| <b>PP5</b>         | 2                            |
| <b>PP6</b>         | 4                            |

340

341 Table 8 shows the data of the participants who did not use the system.

342

343 **Table 8. Data of participants who did not use the system**

| <b>Participant</b> | <b>Gender</b>  | <b>Type of caregiver</b>                  | <b>Health Condition</b>     | <b>Time elapsed since diagnosis</b> |
|--------------------|----------------|-------------------------------------------|-----------------------------|-------------------------------------|
| PP2                | F <sup>a</sup> | Formal caregivers <sup>c</sup>            | Multiple Sclerosis          | 4 years                             |
| PP4                | M <sup>b</sup> | Informal <sup>d</sup> + formal caregivers | SCI <sup>e</sup> (C5 level) | 2 years                             |

344 <sup>a</sup> F – Female; <sup>b</sup> M – Male; <sup>c</sup> Informal caregiver – refers to a family member who cares the  
 345 person; <sup>d</sup> Formal caregiver – refers to a professionals who are paid to care; <sup>e</sup> SCI – Spinal Cord  
 346 Injury.  
 347

348 At the initial assessment using the COPM, both PP2 and PP4 reported that watching  
 349 TV was a very important activity in their everyday lives, but that they were not satisfied  
 350 with the way they performed this activity. Thus, the TV was the only device connected to  
 351 the gBox for control.

352 Table 9 presents the results of the FIM™ with respect to functional independence.

353

354 **Table 9. FIM™ results of the participants who did not use the system**

| Participant | Motor FIM™ | Cognitive FIM™ | Total FIM™ |
|-------------|------------|----------------|------------|
| PP2         | 26/91      | 35/35          | 61/126     |
| PP4         | 13/91      | 35/35          | 48/126     |

355

356 According to the FIM™ data, both participants (PP2 and PP4) had need for  
 357 maximum assistance to perform motor activities and presented total independence for  
 358 cognitive activities.

359 At reassessment, these participants stated that they found the equipment useful,  
 360 responding positively to all the assessment instruments. However, the system data records  
 361 available at the Web application showed that they do not use the equipment at all.

362 Both participants present some similar characteristics that may have contributed to  
 363 not using the equipment: they have difficulty dealing with the diagnosis or with their  
 364 current health condition; caregivers not close or not engaged in this additional task; they  
 365 report that the equipment does not allow total independence and that they have little  
 366 knowledge of technology, limited to communication through the smartphone.

367

368 **Discussion**

369        This study was conducted with six participants. Despite its small sample size, this  
370 research aimed to analyze participants using the system in their homes, for a prolonged  
371 time, and not occasionally in the laboratory, because its main objectives were to assess  
372 occupational performance, usability, and satisfaction with the developed AT system.

373        All the participants who used the SE system need considerable assistance from their  
374 families or formal caregivers to perform their ADL, which was evidenced by the  
375 FIM™. For them, ‘control the TV’ was the most important activity, according to the  
376 COPM.

377        The TV is an extremely popular appliance and an important resource of  
378 entertainment, ~~mainly for people with disabilities~~. According to Myburg et al. [71], TV  
379 control systems were among the most frequent environment control devices in the  
380 population studied (people with SCI).

381        Although the system presents more options to control electronic devices, the  
382 participants did not use all of them, according to the COPM. Several researchers have  
383 reported the significance of considering factors that are important for the people who will  
384 use an AT device [22,24,32] aiming at better adherence and results.

385        Two participants (PP1 and PP6) wear glasses. Duchowski [54] points out that the use  
386 of lenses (contact lenses or glasses) can interfere with the eye tracker ability to locate the  
387 corneal reflex, as they have reflective surfaces; however, the use of glasses did not  
388 interfere with the performance in using the system in the present study.

389        In the COPM, the participants self-evaluated their performance (P) in the activities  
390 they considered important, and their satisfaction (S) with performance before and after  
391 using the system. The higher the score, the better the performance or satisfaction.

392        The final assessments (P2 or S2) of all participants who used the system were higher  
393 than their initial assessments (P1 or S1). Except for the change in performance of

394 **participant** PP1, all other evaluations showed changes greater than two points, which is  
395 considered by Law et al. [65] as a clinically important change.

396 **Statistical analysis of the COPM showed positive results.** For **participants** PP3, PP5  
397 and PP6, the initial evaluation scores indicate that they were unable to perform the  
398 activities or presented great difficulty in performing them, also reflecting on their low  
399 satisfaction. At the final assessment, **the results clearly showed that the participants had a**  
400 **new way of interacting with the environment more actively** and, consequently, greater  
401 satisfaction with performance.

402 Among all the participants, **participant** PP1 was the only one who still has some  
403 manual skills, thus she can operate the TV remote control, although with some difficulty,  
404 and getting tired along the process. Therefore, she presented higher initial scores and  
405 smaller changes at reevaluation.

406 **Regarding the QUEST 2.0, to assess the satisfaction with the resource, the**  
407 **participants** should consider the entire set of hardware (gBox, notebook computer, eye  
408 tracker, router, and portable table) and software (CI). Participants **PP1 and PP3 scored**  
409 **less than 5.0**, referring to difficulties in calibrating the eye tracker, occasional visual  
410 discomfort, and difficulty in using the system (in the case of the **participant** with the  
411 greatest motor impairment).

412 **To assess the satisfaction with the service provided, the participants considered**  
413 installation of the equipment, explanations, training, troubleshooting, and necessary  
414 follow-up during the week of use. **In this item, all the scores were the highest (5.0).** **Good**  
415 professionals and services are items appointed by Lenker et al. [22] as a **positive** point in  
416 the process of obtaining an AT resource, leading to better **results** with use. **In contrast,**  
417 **lack of continuous support can lead participants to lose interest in its use [17].**

418 The QUEST 2.0 total average (between 4.6 and 5.0) obtained in this research shows  
419 that the participants were satisfied with the SE. This result corroborates the findings of  
420 two studies of the systematic review conducted by Brandt et al. [48] on environmental  
421 control systems and smart homes used by people with disabilities.

422 The aspect that the participants considered most important in the SE control system  
423 was 'effectiveness'. Demers et al. [72] defined this term as the "goal achievement with  
424 the AT device" (p.189), reinforcing that the system has met the needs of these people. Our  
425 findings corroborate those by Shone Stickel et al. [73], who also found effectiveness as  
426 the most important attribute of electronic AT devices for performance of ADL.

427 In the PIADS, respondents assessed how they were affected by the SE system.  
428 Participants PP1, PP5, and PP6 had the highest average values, indicating a maximum  
429 positive impact with the use of the SE. They assigned the highest values to the  
430 Adaptability subscale, indicating that with the use of the system they felt more willing to  
431 take risks and more motivated to participate socially [66]. Participant PP3, who has the  
432 most significant motor impairment, presented the lowest average among the participants.  
433 This instrument, as previously mentioned, was answered by her mother based on what she  
434 believed her daughter's assessment would be. Thus, it may not reliably represent the  
435 participant's assessment.

436 The developers of this instrument [66] claim that these three subscales (Competence,  
437 Adaptability, and Self-esteem) are sufficiently sensitive to assess the psychosocial impact  
438 of an AT device or resource on the user, which are included in the QoL concept. In  
439 addition, the longer the period of use, the greater the feeling of competence [74], being  
440 that the hypotheses for it are that the longer the usage time: 1) the more the users  
441 appreciate the effect; 2) reflects the user's real need for the device.

442 Due to the short time of use of the SEs in this study (one week), it is not possible to  
443 state that there was a real change in the psychosocial aspects of the participants, but it  
444 indicates a tendency toward this change, in view of the results.

445 **Regarding the SUS instrument, the result (85.6) indicates that the usability of our**  
446 **system was well evaluated.** According to Bangor, Kortum and Miller [75], products  
447 evaluated in the range of 80 points are considered good, and products evaluated in the  
448 range of 90 points are considered exceptional.

449 The lowest evaluation refers, again, to participant PP3, whose answers pointed to  
450 some degree of complexity in the system and the need of a technical person or prior  
451 learning. Beyond the motor impairment of this participant, other factors may have  
452 interfered with the use of the eye tracker, such as her position in bed, small opening of the  
453 eye sometimes, tiredness with use, and difficulty of caregivers with the use of computers  
454 and programs.

455 Despite the lower ratings assigned by this **participant**, it seems that for all  
456 participants, on average, the assessment instruments showed positive results in relation to  
457 occupational performance, satisfaction with performance, satisfaction with the SE system,  
458 and usability of the system.

459 Many studies have evaluated improvements in these aspects after people with  
460 disabilities used environment control systems or electronic AT devices [17,44,73,76,77],  
461 whereas other studies have assessed ways of interacting with the environment through eye  
462 trackers [78,79]. However, no studies with the same objectives and using the same  
463 methodology of the present research, that is, use of IROG technology for SE control, have  
464 been found for comparison.

465 As the results show better occupational performance, satisfaction with performance  
466 ~~and~~ with the SE, and system usability, it can be concluded that the SE controlled by IROG

467 evaluated in this research provided people with motor disabilities with more independent  
468 operation and control of the equipment.

469 All the reports of participants point positive aspects with the use of the SE system.  
470 These statements corroborate the researched literature [80–83], since independence,  
471 control and privacy are highly important aspects pointed by people with disabilities who  
472 used environment control systems or electronic aids to daily living (EADL).

473 Participant PP6's speech also points to an outcome present in the study by  
474 Verdonck, Chard and Nolan's [81]: the embarrassment that people with disabilities  
475 present regarding their recurring requests for help, followed by apologies, as they feel  
476 uncomfortable to interrupt their caregivers' routine. According to those authors, the use  
477 of EADL changes this dynamic, with fewer apologies, less discomfort, and reduced  
478 caregiver burden.

479 The user manual was an additional material left with the participants to assist with the  
480 use of the SE system. The literature highlights how important explanations and training  
481 are for understanding the use and for adherence to the AT resource. Myburg et al. [71]  
482 found that training was considered crucial for the total integration of the environment  
483 control system in the lives of people with spinal cord injury, as well as the involvement of  
484 the occupational therapist in the testing, prescription and configuration of the system.

485 Information obtained through the Web application showed that the system was not  
486 used every day. The justifications given by the participants included trips, medical or  
487 rehabilitation consultations, and other leisure activities, such as going to church or taking  
488 short tours.

489 However, some other hypotheses were raised, corroborating the literature: the system  
490 has limitations, requiring other person to activate part of the equipment [82,84] or, when  
491 there is some voluntary movement, people prefer to behave as they are more accustomed

492 [85]. Another possibility is that the TV was controlled by a person who was in the same  
493 room as the participant, using the standard TV remote control.

494 About the participants who did not use the system, Costa et al. [85] found some  
495 factors that can contribute to the understanding: lack of equipment functionality (for not  
496 providing the desired independence), difficulty in use, embarrassment in using the device,  
497 lack of support from family members, lack of user motivation.

498 Regarding non-acceptance of diagnoses, studies have shown that this is an important  
499 factor to be considered when prescribing or selecting an AT device or resource [25,86];  
500 however, in the present study, this information only appeared at the reevaluation.

501 Wessels et al. [25] reported that there is a difference in the way the AT resource will  
502 be viewed between people who were born with a disability (for them, technology opens a  
503 new range of possibilities) and those who have acquired a disability (because, for them,  
504 technology will never replace the lost function).

505 Participants PP2 and PP4 are in the second group, since they acquired the disability  
506 as adults. A recurring line in the interviews is that they were very active and  
507 independent in the past, and now they are dependent for practically all activities. For  
508 them, the disability has also brought other types of losses, such as moving from their  
509 hometowns, changing their standard of living, ending relationships, or losing jobs. Such  
510 cases often result in periods of depression [25]. In this sense, for these people, it is  
511 hypothesized that they would only benefit from technology if their dependency could be  
512 completely reversed.

513 Another associated factor that may have contributed to non-use of the SE is that the  
514 AT device can highlight the disability [19,23,86]. Verza et al. [86] found that 30.3% of  
515 the reasons for abandoning or not using an AT device are due to the patient's non-  
516 acceptance. For those authors, although the AT device is seen as a possibility to increase



517 functionality, it can be interpreted as a validation of the disability and loss of  
518 independence, resulting in decreased self-esteem.

519 It should be noted that, although the system registers activation of the equipment, this  
520 information was not passed on to the participants, so that the use of the system was based  
521 on their real needs and desires, and not on the fact that they felt obliged to use it.

522 It is worth restating that it is important that the professional involved perform a wide  
523 and in-depth assessment of the patient's real demands, expectations, and possibilities of  
524 the proposed AT device, as well as consider their participation in the choice. These points  
525 are important to ensure acceptance and continuity of use, since abandonment can  
526 represent a waste of time and financial expenses (their own or from the government)  
527 [17,24,26,27].

528

## 529 **Conclusions**

530 **Participants** who used the IROG-controlled SE system showed better occupational  
531 performance and satisfaction with performance. In addition, the psychosocial impact  
532 was close to the maximum, satisfaction with the system was well evaluated and, for  
533 three participants, the usability was considered good. The **participant** who had a more  
534 pronounced motor impairment and, therefore, more difficulty in using the system, rated  
535 its psychosocial impact and usability with lower scores.

536 The two participants who did not use the system presented characteristics such as  
537 non-acceptance of their diagnoses or current health conditions, weak relationship with  
538 caregivers, and need for assistance with using the equipment. Besides that, the fact that  
539 an AT device possibly reinforces disability may have corroborated these results.

540 The HAAT model was used as a basis for definition of the study methodology  
541 aiming to achieve its objectives. Although the AT resource (SE system) was previously  
542 defined, in order to be evaluated, the choice of **participants** was not random, and  
543 professionals were asked to ~~indicate the possible~~ participants. Regarding the Activity  
544 component, the activities considered important for each participant were evaluated  
545 according to their wishes, even though other possibilities are available for control. ~~Still~~  
546 ~~in the Activity component, it~~ was considered the most familiar place to conduct the  
547 research, that is, each of the **participant's** homes.

548 Regarding the Human component, the motor and cognitive skills of the participant  
549 were taken into account. The eye tracker using IROG technology was ~~choose~~ as the  
550 most suitable technique, because is less intrusive. Motivation to resume performance of  
551 the activities was assessed through the COPM **contemplating the most significant.**

552 With respect to the Context component, it was noticed that the **participants** who had  
553 greater social support (from family members and/or formal caregivers) actually used the  
554 SE and were able to provide a more in-depth assessment. Those who did not have this  
555 support, or had it in a ~~weakened~~ way, did not use the SE.

556 Finally, regarding the Assistive Technology component, it was evaluated that the  
557 SE system functioned as a facilitator to carry out the desired activities, enabling greater  
558 exercise of autonomy and independence.

559 Concerning the ICF, its components can also be broken down into the elements of  
560 this research. Health Condition considered the severe motor disability of the  
561 participants. In Body Functions and Structures, the movement limitations interfered in  
562 the way each of them interacted with the electronic equipment. Activities important for  
563 the participants and their Participation were assessed through the FIM<sup>TM</sup> and COPM  
564 instruments. Personal Factors were verified using the QUEST 2.0 and PIADS

565 instruments. Finally, about Environmental Factors, the SE system, as in the HAAT  
566 model, is considered a facilitator, and its usability was assessed through the SUS scale.

567       Considering that disability is indicated by the HAAT model and the ICF as inherent  
568 in social structures, and not in the person, the results found suggest that the SE system  
569 enabled reduction in the incapacity of the **participants**, who thus had greater  
570 participation in related activities.

571       This study provided a wide evaluation of equipment that aims to allow greater  
572 independence for people with severe motor disabilities, from the point of view of its  
573 operation and usability, as well as the benefits it provided to the people who used it.  
574 Several assessment instruments were used to achieve the study objectives.

575       For professionals, this study highlights the importance of a good evaluation for the  
576 prescription and development of AT resources, as well as new possibilities to provide  
577 people with severe motor disabilities with greater independence to carry out their  
578 everyday activities with regard to equipment control, avoiding abandonment or non-use.

579       Future studies with larger samples and longer duration should be conducted,  
580 expanding the possibilities of controlled equipment and devices, in order to understand  
581 whether the benefits remain in long term.

582

## 583 **Patents**

584       The gBox patent, together with the environment control system named “Remote  
585 micro-controlled device for charging residential loads via the Internet with emitter and  
586 receiver of commands via integrated infrared”, was submitted to the Institute of  
587 Technological Innovation – INIT at UFES, Brazil, and evaluation is under process.

588

## 589 **Acknowledgments**

590 The authors would like to thank all the professionals and participants involved in this  
591 study for their contribution.

592

## 593 **References**

- 594 1. Brasil. CORDE. Comitê de Ajudas Técnicas, ATA VII; 2008. Available from:  
595 <[http://www.mj.gov.br/sedh/ct/corde/dpdh/corde/comite\\_at.asp](http://www.mj.gov.br/sedh/ct/corde/dpdh/corde/comite_at.asp)>.
- 596 2. United States Congress. Assistive Technology Act of 2004: Amendment to the  
597 assistive technology act of 1998 (Public Law 108–364); 2004.
- 598 3. Siqueira SC, Vitorino PVO, Prudente COM, Santana TS, Melo GF. Quality of life  
599 of patients with Amyotrophic Lateral Sclerosis. *Rev Rene*. 2017; 18(1):139-146.  
600 doi: 10.15253/2175-6783.2017000100019.
- 601 4. Marrie RA, Cutter GR, Tyry T, Cofield SS, Fox R, Salter A. Upper limb  
602 impairment is associated with use of assistive devices and unemployment in  
603 multiple sclerosis. *Multiple Sclerosis and Related Disorders*. 2017; 13:87-92. doi:  
604 10.1016/j.msard.2017.02.013.
- 605 5. Shamshiri H, Fatehi F, Abolfazli R, Harirchian MH, Sedighi B, Zamani B, et al.  
606 Trends of quality of life changes in amyotrophic lateral sclerosis patients. *J Neurol*  
607 *Sci*. 2016; 368:35-40. doi: 10.1016/j.jns.2016.06.056.
- 608 6. Bertoni R, Lamers I, Chen CC, Feys P, Cattaneo D. Unilateral and bilateral upper  
609 limb dysfunction at body functions, activity and participation levels in people with  
610 multiple sclerosis. *Mult Scler*. 2015; 21(12):1566-1574. doi:  
611 10.1177/1352458514567553.
- 612 7. Souza FDA, Cruz DMC, Ferrigno ISV, Tsukimoto GR, Figliolia CS. Correlação  
613 entre papéis ocupacionais e independência de usuários com lesão medular em

- 614 processo de reabilitação. *Mundo da Saúde*. 2013; 37(2):166-175. doi:  
615 10.15343/0104-7809.2013372166175.
- 616 8. Riazi A, Bradshaw SA, Playford ED. Quality of life in the care home: a qualitative  
617 study of the perspectives of residents with multiple sclerosis. *Disabil Rehabil*. 2012;  
618 34(24):2095-2102. doi: 10.3109/09638288.2012.672539.
- 619 9. Lee YC, Chen YM, Hsueh IP, Wang YH, Hsieh CL. The impact of stroke: insights  
620 from patients in Taiwan. *Occup Ther Int*. 2010; 17(3):152-158. doi:  
621 10.1002/oti.301.
- 622 10. Wolf TJ, Baum C, Connor LT. Changing face of stroke: Implications for  
623 occupational therapy practice. *AJOT*. 2009; 63:621-625. doi:  
624 10.5014/ajot.63.5.621.
- 625 11. Pedretti LW, Early ME. Desempenho ocupacional e modelos de prática para  
626 disfunção física. In: Pedretti LW, Early ME. *Terapia ocupacional: capacidades*  
627 *práticas para disfunções físicas*. São Paulo: Roca; 2004.
- 628 12. Camacho A, Esteban J, Paradas C. Informe de la Fundación del Cerebro sobre el  
629 impacto social de la esclerosis lateral amiotrófica y las enfermedades  
630 neuromusculares. *Neurología*. 2015; 33:35-46. doi: 10.1016/j.nrl.2015.02.003.
- 631 13. World Health Organization – WHO. *International Classification of Functioning,*  
632 *Disability and Health: ICF*. World Health Organization; 2001.
- 633 14. Farias N, Buchalla CM. A Classificação Internacional de Funcionalidade,  
634 Incapacidade e Saúde da Organização Mundial da Saúde: conceitos, usos e  
635 perspectivas. *Rev Bras Epidemiol*. 2005; 8(2):187-193. doi: 10.1590/S1415-  
636 790X2005000200011.

- 637 15. Dahl TH. International classification of functioning, disability and health: an  
638 introduction and discussion of its potential impact on rehabilitation services and  
639 research. *J Rehabil Med.* 2002; 34:201-204. doi: 10.1080/165019702760279170.
- 640 16. Borg J, Lindström A, Larsson S. Assistive technology in developing countries:  
641 national and international responsibilities to implement the Convention on the  
642 Rights of Persons with Disabilities. Viewpoint. *Lancet.* 2009; 374(28):1863-1865.  
643 doi: 10.1016/S0140-6736(09)61872-9.
- 644 17. Jamwal R, Callaway L, Ackerl J, Farnworth L, Winkler D. Electronic assistive  
645 technology used by people with acquired brain injury in shared supported  
646 accommodation: Implications for occupational therapy. *British Journal of*  
647 *Occupational Therapy.* 2017; 80(2):89-98. doi: 10.1177/0308022616678634.
- 648 18. Cruz DMC, Ioshimoto MTA. Tecnologia assistiva para as atividades de vida diária  
649 na tetraplegia completa C6 pós-lesão medular. *Rev Triang: Ens. Pesq. Ext.*  
650 *Uberaba.* 2010; 3(2):177-190. doi: 10.18554/rt.v3i2.153.
- 651 19. Andrade VS, Pereira LSM. Influência da tecnologia assistiva no desempenho  
652 funcional e na qualidade de vida de idosos comunitários frágeis: uma revisão  
653 bibliográfica. *Rev Bras Geriatr Gerontol.* 2009; 12(1):113-122. doi: 10.1590/1809-  
654 9823.2009120110.
- 655 20. Plotkin A, Sela L, Weissbrod A, Kahana R, Haviv L, Yeshurun Y, et al. Sniffing  
656 enables communication and environmental control for the severely disabled. *PNAS.*  
657 2010; 107(32):14413-14418. doi: 10.1073/pnas.1006746107.
- 658 21. Lulé D, Zickler C, Häcker S, Bruno MA, Demertzi A, Pellas F, et al. Life can be  
659 worth living in locked-in syndrome. *Progress in Brain Research.* 2009; 177:339-  
660 351. doi: 10.1016/S0079-6123(09)17723-3.

- 661 22. Lenker JA, Harris F, Taugher M, Smith RO. Consumer perspectives on assistive  
662 technology outcomes. *Disabil Rehabil Assist Technol.* 2013; 8(5):373-380. doi:  
663 10.3109/17483107.2012.749429.
- 664 23. Squires LA, Williams N, Morrison VL. Matching and accepting assistive  
665 technology in multiple sclerosis: A focus group study with people with multiple  
666 sclerosis, carers and occupational therapists. *Journal of Health Psychology.* 2016;  
667 24:1-15. doi: 10.1177/1359105316677293.
- 668 24. Cruz DMC, Emmel MLG, Manzini MG, Mendes PVB. Assistive technology  
669 accessibility and abandonment: challenges for occupational therapists. *The Open*  
670 *Journal of Occupational Therapy.* 2016; 4(1):Article 10. doi: 10.15453/2168-  
671 6408.1166.
- 672 25. Wessels R, Dijcks B, Soede M, Gelderblom GJ, De Witte L. Non-use of provided  
673 assistive technology devices: a literature overview. *Technology and Disability.*  
674 2003; 15(4):231-238. doi: 10.3233/TAD-2003-15404.
- 675 26. Riemer-Reiss ML, Wacker RR. Factors associated with assistive technology  
676 discontinuance among individuals with disabilities. *Journal of Rehabilitation.* 2000;  
677 66(3):44-50.
- 678 27. Phillips B, Zhao H. Predictors of assistive technology abandonment. *Assistive*  
679 *Technology.* 1993; 5(1):36-45. doi: 10.1080/10400435.1993.10132205.
- 680 28. Alper S, Raharimirina S. Assistive technology for individuals with disabilities: a  
681 review and synthesis of the literature. *Journal of Special Education Technology.*  
682 2006; 21(2):47-64. doi: 10.1177/016264340602100204.
- 683 29. Cook A, Polgar J. *Assistive Technologies: Principles and Practice.* 4th ed. St.  
684 Louis: Mosby Elsevier; 2015.

- 685 30. Kinney A, Goodwin DM, Gitlow L. Measuring assistive technology outcomes: a  
686 user centered approach. *Assistive Technology Outcomes and Benefits*. 2016; 10:94-  
687 110.
- 688 31. Peterson DB, Murray GC. Ethics and assistive technology service provision.  
689 *Disabil Rehabil Assist Technol*. 2006; 1:59-67. doi: 10.1080/09638280500167241.
- 690 32. Rocha EF, Castiglioni MC. Reflexões sobre recursos tecnológicos: ajudas técnicas,  
691 tecnologia assistiva, tecnologia de assistência e tecnologia de apoio. *Rev Ter Ocup*  
692 *Univ São Paulo*. 2005; 16(3):97-104. doi: 10.11606/issn.2238-6149.v16i3p97-104.
- 693 33. Netten JJ, Dijkstra PU, Geertzen JHB, Postema K. What influences a patient's  
694 decision to use custom-made orthopaedic shoes? *BMC Musculoskeletal Disorders*.  
695 2012; 13:92. doi: 10.1186/1471-2474-13-92.
- 696 34. Rampinelli M, Bastos TF, Vassallo RF, Pizarro D. Implementation of an intelligent  
697 space for localizing and controlling a robotic wheelchair. In: 2012 ISSNIP  
698 Biosignals and Biorobotics Conference: Biosignals and Robotics for Better and  
699 Safer Living (BRC); 9-11th January 2012; Manaus-Brazil: IEEE – Institute of  
700 Electrical and Electronics Engineers; 2012. 1-4. doi: 10.1109/BRC.2012.6222187.
- 701 35. Lee JH, Hashimoto H. Intelligent Space: concept and contents. *Advanced Robotics*.  
702 2002; 16(3):265-280. doi: 10.1163/156855302760121936.
- 703 36. Aarts EH, Encarnação JL. Into Ambient Intelligence. In. Aarts EH, Encarnação JL,  
704 editors. *True visions: The emergence of ambient intelligence*. Springer:  
705 Netherlands; 2008. pp. 1-16.
- 706 37. Kadam R, Mahamuni P, Parikh Y. Smart Home System. *International Journal of*  
707 *Innovative Research in Advanced Engineering*. 2015; 2:81-86.
- 708 38. Rivera-illingworth F, Callaghan V, Hagaras H. A neural network agent based  
709 approach to activity detection in AmI environments. In: *Proceedings of IEEE*



- 710 International Workshop on Intelligent Environments; 28-29th June 2005;  
711 Colchester (United Kingdom). Institution of Engineering and Technology; 2005. 1-  
712 12. doi: 10.1049/ic:20050222.
- 713 39. Tello RJMG, Bissoli ALC, Ferrara F, Müller S, Ferreira A, Bastos-Filho TF.  
714 Development of a Human Machine Interface for Control of Robotic Wheelchair  
715 and Smart Environment. IFAC-PapersOnLine. 2015; 48:136-141. doi:  
716 10.1016/j.ifacol.2015.12.023.
- 717 40. Hussein A, Adda M, Atieh M, Fahs W. Smart Home Design for Disabled People  
718 based on Neural Networks. Procedia Computer Science. 2014; 37:117-126. doi:  
719 10.1016/j.procs.2014.08.020.
- 720 41. Rampinelli M, Covre VB, Queiroz FM, Vassallo RF, Bastos-Filho TF, Mazo M.  
721 An intelligent space for mobile robot localization using a multi-camera system.  
722 Sensors. 2014; 14:15039-15064. doi: 10.3390/s140815039.
- 723 42. Adami I, Antona M, Stephanidis C. Ambient Assisted Living for the Motor  
724 Impaired. In. Koroupetroglou G, editor. Assistive Technologies, Disability  
725 Informatics and Computer Access for Motor Limitations. USA: IGI Global; 2013,  
726 pp. 76-104.
- 727 43. Bastos Filho TF, Fernandes MR, Lucena-Jr VF, Pereira CE. Proposal of  
728 Architecture for Integration of a Wheelchair in an Intelligent Space. In: Proceedings  
729 of 4th IEEE Biosignals and Biorobotics Conference (ISSNIP); 18-20th February  
730 2013; Rio de Janeiro-RJ (Brazil); 2013. 6-11.
- 731 44. Ocepek J, Roberts AEK, Vidmar G. Evaluation of treatment in the smart home IRIS  
732 in terms of functional independence and occupational performance and satisfaction.  
733 Computational and Mathematical Methods in Medicine. 2013; 2013:10 pages. doi:  
734 10.1155/2013/926858.

- 735 45. Gentry T. Smart homes for people with neurological disability: State of the art.  
736 NeuroRehabilitation. 2009; 25:209-217. doi: 10.3233/NRE-2009-0517.
- 737 46. Muñoz D, Fortes P. O princípio da autonomia e o consentimento livre e esclarecido.  
738 In. Iniciação à Bioética. Costa SIF, Oselka G, Garrafa V, coordinators. Brasília:  
739 CFM; 1998. pp. 53-70.
- 740 47. Martin S, Kelly G, Kernohan WG, McCreight B, Nugent C. Smart home  
741 technologies for health and social support. Cochrane Database of Systematic  
742 Reviews. 2008; 4:1-10. doi: 10.1002/14651858.CD006412.pub2.
- 743 48. Brandt Å, Samuelsson K, Töytäri O, Salminen A-L. Activity and participation,  
744 quality of life and user satisfaction outcomes of environmental control systems and  
745 smart home technology: a systematic review. Disability and Rehabilitation:  
746 Assistive Technology. 2011; 6(3):189-206. doi: 10.3109/17483107.2010.532286.
- 747 49. Marikyan D, Papagiannidis S, Alamanos E. A systematic review of the smart home  
748 literature: A user perspective. Technological Forecasting & Social Change. 2019;  
749 138:139-154. doi: 10.1016/j.techfore.2018.08.015.
- 750 50. Bissoli A, Lavino-Junior D, Sime M, Encarnação L, Bastos-Filho T. A Human-  
751 Machine Interface Based on Eye Tracking for Controlling and Monitoring a Smart  
752 Home Using the Internet of Things. Sensors. 2019; 19:859-884. doi:  
753 10.3390/s19040859.
- 754 51. Ding Z, Luo J, Deng H. Accelerated exhaustive eye glints localization method for  
755 infrared video oculography. In: SAC '18 – Proceedings of the 33rd Annual ACM  
756 Symposium on Applied Computing; April 2018; Pau France. New York-NY  
757 (United States of America): Association for Computing Machinery; 2018. 620–627.  
758 doi: <https://doi.org/10.1145/3167132.3167200>.

- 759 52. Eid MA, Giakoumidis N, El-Saddik A. A Novel Eye-Gaze-Controlled Wheelchair  
760 System for Navigating Unknown Environments: Case Study with a Person with  
761 ALS. *IEEE Access*. 2016; 4:558-573. doi:10.1109/ACCESS.2016.2520093.
- 762 53. Giannotto EC. Uso de rastreamento do olhar na avaliação da experiência do tele-  
763 usuário de aplicações de TV interativa. M.Sc. Thesis, Polytechnic School of the  
764 University of São Paulo. Department of Computer Engineering and Digital  
765 Systems. 2009, 290 p. Available from:  
766 <https://teses.usp.br/teses/disponiveis/3/3141/tde-15042009-151212/pt-br.php>.
- 767 54. Duchowski AT. *Eye tracking methodology: Theory and practice*. 2nd ed. London:  
768 Springer-Verlag; 2007.
- 769 55. Anders S, Weiskopf N, Lule D, Birbaumer N. Infrared oculography—validation of  
770 a new method to monitor startle eyeblink amplitudes during fMRI. *NeuroImage*.  
771 2004; 22(2):767-770. doi: 10.1016/j.neuroimage.2004.01.024.
- 772 56. Sharma A, Abrol P. Eye gaze techniques for human computer interaction: a  
773 research survey. *International Journal of Computer Applications*. 2013; 71(9):18-  
774 29. doi: 10.5120/12386-8738.
- 775 57. Van Es MA, Hardiman O, Chio A, Al-Chalabi A, Pasterkamp RJ, Veldink JH, et al.  
776 Amyotrophic lateral sclerosis. *The Lancet*. 2017; 390(10107):2084-2098. doi:  
777 10.1016/S0140-6736(17)31287-4.
- 778 58. Alves ACJ, Matsukura TS. Revisão sobre avaliações para indicação de dispositivos  
779 de tecnologia assistiva. *Rev Ter Ocup Univ São Paulo*. 2014; 25(2):199-207. doi:  
780 10.11606/issn.2238-6149.v25i2p199-207.
- 781 59. Lovarini M, Mccluskey A, Curtin M. Editorial: Critically appraised papers. Limited  
782 high-quality research in the effectiveness of assistive technology. *Aust Occup Ther*  
783 *J*. 2006; 50(1):50.

- 784 60. Gelderblom GJ, De Witte LP. The assessment of assistive technology outcomes,  
785 effects and costs. *Technol and Disabil.* 2002; 14(3):91-94. doi: 10.3233/tad-2002-  
786 14302.
- 787 61. Tobii Eye Tracker 4C. Available from: [https://gaming.tobii.com/product/tobii-eye-](https://gaming.tobii.com/product/tobii-eye-tracker-4c/)  
788 [tracker-4c/](https://gaming.tobii.com/product/tobii-eye-tracker-4c/). Access in: February 24, 2019.
- 789 62. Tobii Dynavox. Gaze Point. Available from: [https://www.tobiidynavox.com/en-](https://www.tobiidynavox.com/en-us/software/free-resources/gaze-point-1/)  
790 [us/software/free-resources/gaze-point-1/](https://www.tobiidynavox.com/en-us/software/free-resources/gaze-point-1/). Access in: February 24, 2019.
- 791 63. Riberto M, Miyazaki MH, Jucá SSH, Sakamoto H, Pinto PPN, Battistella LR.  
792 Validação da Versão Brasileira da Medida de Independência Funcional. *Acta*  
793 *Fisiatr.* 2004; 11(2):72-76. doi: 10.5935/0104-7795.20040003.
- 794 64. Linacre JM, Heinemann AW, Wright BD, Granger CV, Hamilton BB. The structure  
795 and stability of the Functional Independence Measure. *Arch Phys Med Rehabil.*  
796 1994; 75:127-132. doi: 10.1016/0003-9993(94)90384-0.
- 797 65. Law M, Baptiste S, Carswell A, McColl M, Polatajko H, Pollock N. Medida  
798 canadense de desempenho ocupacional (COPM). Magalhães LC, Magalhães, LV,  
799 Cardoso AA, organizers and translators. Belo Horizonte: Ed UFMG; 2009.
- 800 66. Jutai J, Day H. Psychosocial Impact of Assistive Devices Scale (PIADS). *Technol*  
801 *and Disabil.* 2002; 14:107-111. doi: 10.1037/t45599-000.
- 802 67. Demers L, Weiss-Lambrou R, Ska B. The Quebec User Evaluation of Satisfaction  
803 with Assistive Technology (QUEST 2.0): an overview and recent progress. *Technol*  
804 *and Disabil.* 2002; 14:101-105. doi: 10.13072/midss.298.
- 805 68. Carvalho KEC, Gois Junior MB, Sá KN. Tradução e validação do Quebec User  
806 Evaluation of Satisfaction with Assistive Technology (QUEST 2.0) para o idioma  
807 português do Brasil. *Rev. Bras. Reumatol.* 2014; 54(4):260-267. doi:  
808 10.1016/j.rbr.2014.04.003.

- 809 69. Brooke J. SUS: a "quick and dirty" usability scale. In: Jordan PW, Thomas B,  
810 McClelland IL, Weerdmeester B, editors. Usability Evaluation in Industry.  
811 London: Taylor and Francis; 1996. 189-194.
- 812 70. Calvo A, Chiò A, Castellina E, Corno F, Farinetti L, Ghiglione P, et al. Eye  
813 tracking impact on Quality-of-life of ALS patients. In: Computers Helping People  
814 with Special Needs. Proceedings of 11th International conference on computers  
815 helping people with special needs; 9-11th July 2008; Linz (Austria): Springer-  
816 Verlag Berlin Heidelberg; 2008. 70-77. doi: 10.1007/978-3-540-70540-6.
- 817 71. Myburg M, Allan E, Nalder E, Schuurs S, Amsters D. Environmental control  
818 systems – the experiences of people with spinal cord injury and the implications for  
819 prescribers. *Disability and Rehabilitation: Assistive Technology*. 2017; 12(2):128-  
820 136. doi: 10.3109/17483107.2015.1099748.
- 821 72. Demers L, Wessels R, Weiss-Lambrou R, Ska B, de Witte LP. Key dimensions of  
822 client satisfaction with assistive technology: a cross-validation of a Canadian  
823 measure in the Netherlands. *J Rehabil Med*. 2001; 33:187-191. doi:  
824 10.1080/165019701750300663.
- 825 73. Shone SM, Ryan S, Rigby PJ, Jutai JW. Toward a comprehensive evaluation of the  
826 impact of electronic aids to daily living: evaluation of consumer satisfaction.  
827 *Disabil Rehabil*. 2002; 24:115-125. doi: 10.1080/09638280110066794.
- 828 74. Day H, Jutai J. Measuring the psychosocial impact of assistive devices: the PIADS.  
829 *Canadian Journal of Rehabilitation*. 1996; 9(2):159-168.
- 830 75. Bangor A, Kortum P, Miller JA. The System Usability Scale (SUS): An Empirical  
831 Evaluation. *International Journal of Human-Computer Interaction*. 2008; 24(6):574-  
832 594. doi: 10.1080/10447310802205776.

- 833 76. Little R. Electronic aids for daily living. *Phys Med Rehabil Clin N Am*. 2010;  
834 21:33-42. doi: 10.1016/j.pmr.2009.07.008.
- 835 77. Boman I-L, Tham K, Granqvist A, Bartfai A, Hemmingsson H. Using electronic  
836 aids to daily living after acquired brain injury: A study of the learning process and  
837 the usability. *Disability and Rehabilitation: Assistive Technology*. 2007; 2(1):23-  
838 33. doi: 10.1080/17483100600856213.
- 839 78. Boustany G, Itani AED, Youssef R, Chami O, Abu-Faraj ZO. Design and  
840 development of a rehabilitative eye-tracking based home automation system. In:  
841 Proceedings of 2016 3rd Middle East Conference on Biomedical Engineering  
842 (MECBME); 6-7<sup>th</sup> October 2016; Beirut (Lebanon). Institute of Electrical and  
843 Electronics Engineers (IEEE): Curran Associates, Inc.; Jan 2017. 30-33. doi:  
844 10.1109/MECBME.2016.7745401.
- 845 79. Brennan CP, McCullagh PJ, Galway L, Lightbody G. Promoting autonomy in a  
846 smart home environment with a smarter interface. In: Proceedings of 2015 37<sup>th</sup>  
847 Annual International Conference of the IEEE Engineering in Medicine and Biology  
848 Society (EMBC); August 25-29 2015; MiCo – Milano Conference Center, Milan  
849 (Italy). Institute of Electrical and Electronics Engineers (IEEE): Curran Associates,  
850 Inc.; Dec 2015. 5032-5035. doi: 10.1109/EMBC.2015.7319522.
- 851 80. Hooper B, Verdonck M, Amsters D, Myburg M, Allan E. Smart-device  
852 environmental control systems: experiences of people with cervical spinal cord  
853 injuries. *Disability and Rehabilitation: Assistive Technology*. 2018; 13(8):24-730.  
854 doi: 10.1080/17483107.2017.1369591.
- 855 81. Verdonck MC, Chard G, Nolan M. Electronic aids to daily living: be able to do  
856 what you want. *Disability and Rehabilitation: Assistive Technology*. 2010;  
857 6(3):268-281. doi:10.3109/17483107.2010.525291.

- 858 82. Judge S, Robertson Z, Hawley MS. Users' Perceptions of Environmental Control  
859 Systems. In: Emiliani PL, Burzagli L, Como A, Gabbanini F, Salminen A-L (eds.).  
860 Assistive Technology from Adapted Equipment to Inclusive Environments -  
861 AAATE 2009; August 31st–September 2nd 2009; Florence (Italy). Amsterdam:  
862 IOS Press; 2009. 426-431.
- 863 83. Harmer J, Bakheit AMO. The benefits of environmental control systems as  
864 perceived by disabled users and their carers. *British Journal of Occupational*  
865 *Therapy*. 1999; 62(9):394-398. doi: 10.1177/030802269906200902.
- 866 84. Palmer P, Seale J. Exploring the attitudes to environmental control systems of  
867 people with physical disabilities: a grounded theory approach. *Technol Disabil*.  
868 2007; 9(1):17-27. doi: 10.3233/TAD-2007-19103.
- 869 85. Costa CR, Ferreira FMRM, Bortolus MV, Carvalho MGR. Dispositivos de  
870 tecnologia assistiva: fatores relacionados ao abandono. *Cad. Ter. Ocup. UFSCar*.  
871 2015; 23(3):611-624. doi: 10.4322/0104-4931.ctoAR0544.7.8.
- 872 86. Verza R, Carvalho ML, Battaglia MA, Uccelli MM. An interdisciplinary approach  
873 to evaluating the need for assistive technology reduces equipment abandonment.  
874 *Mult Scler*. 2006; 12(1):88-93. doi: 10.1191/1352458506ms1233oa.
- 875

## Response to Reviewers

**Title:** Usability, occupational performance and satisfaction evaluation of a smart environment controlled by infrared oculography by people with severe motor disabilities

In response to the reported pending issues, the following information is required:

- **Point 1:** The paper needs to be substantially shortened and condensed.

Answer to point 1: As recommended by the reviewer, the introduction and review have been combined and condensed. The description of the materials and instruments has been reduced. The results and discussion were separated and reorganized.

- **Point 2:** Details and photos that might allow to identify the participants should be omitted.

Answer to point 2: The vignettes with the details and photos of the participants have been removed and only the sociodemographic information that contributed to the discussion was maintained.

- **Point 3:** About the funding received of the Google Inc.

Answer to point 3: Google Inc. only supported the research through Google's Latin America Research Awards to two authors, Teodiano Freire Bastos-Filho and Alexandre Luís Cardoso Bissoli, and this does not alter our adherence to Plos ONE policies on sharing data and materials. This statement can also be found in the cover letter, in the Competing Interests Statement section, as recommended

- **Point 4:** Please explain in more detail why "data cannot be shared publicly because of Ethics Committee terms".

Answer to point 4: Our data contained information that identified the participants. This information has been omitted and the data are being shared in the Supporting Information files.



- **Point 5:** Please amend the methods section and ethics statement of the manuscript to explicitly state that the patient/participant has provided consent for publication: “The individual in this manuscript has given written informed consent (as outlined in PLOS consent form) to publish these case details”.

Answer to point 5: About the use of personal data, participants or their guardians signed the Free and Informed Consent Form (FICF), which guarantees that all personal data are confidential and private, even after the publication of the research. The data protection has been guaranteed by identifying participants by codes, instead of their names or initials, and by not including information such as date of birth and address. Detailed information about the participants health condition had already been excluded from the manuscript after the original decision letter. The terms with the highlighted subsection in both the original version in Portuguese and the translated version in English were included in the list of documents for submission. The current situation in Brazil, due to the COVID-19 pandemic is very serious, and it has been very difficult to meet the participants to obtain their signature on the PLOS specific consent form. Since they are people with disabilities and comorbidities, they have been in quarantine, as a measure to prevent spread of the Sars-CoV-2 virus.

The methods section and ethics statement of the manuscript were amended to explicitly state that the participants has provided consent for publication, through the FICF.

Sincerely,

Mariana Midori Sime (e-mail: [mariana.sime@ufes.br](mailto:mariana.sime@ufes.br))

Vitória-ES (Brazil), May 01, 2021.
